# Supplementary figures and images for: Improved microwave-assisted ligand-free Suzuki–Miyaura cross-coupling of 5-iodo-2′-deoxyuridine in pure water
Source: Royal Society of Chemistry journal article supplement (doi:10.1039/c3nj00174a), 2013-01-01

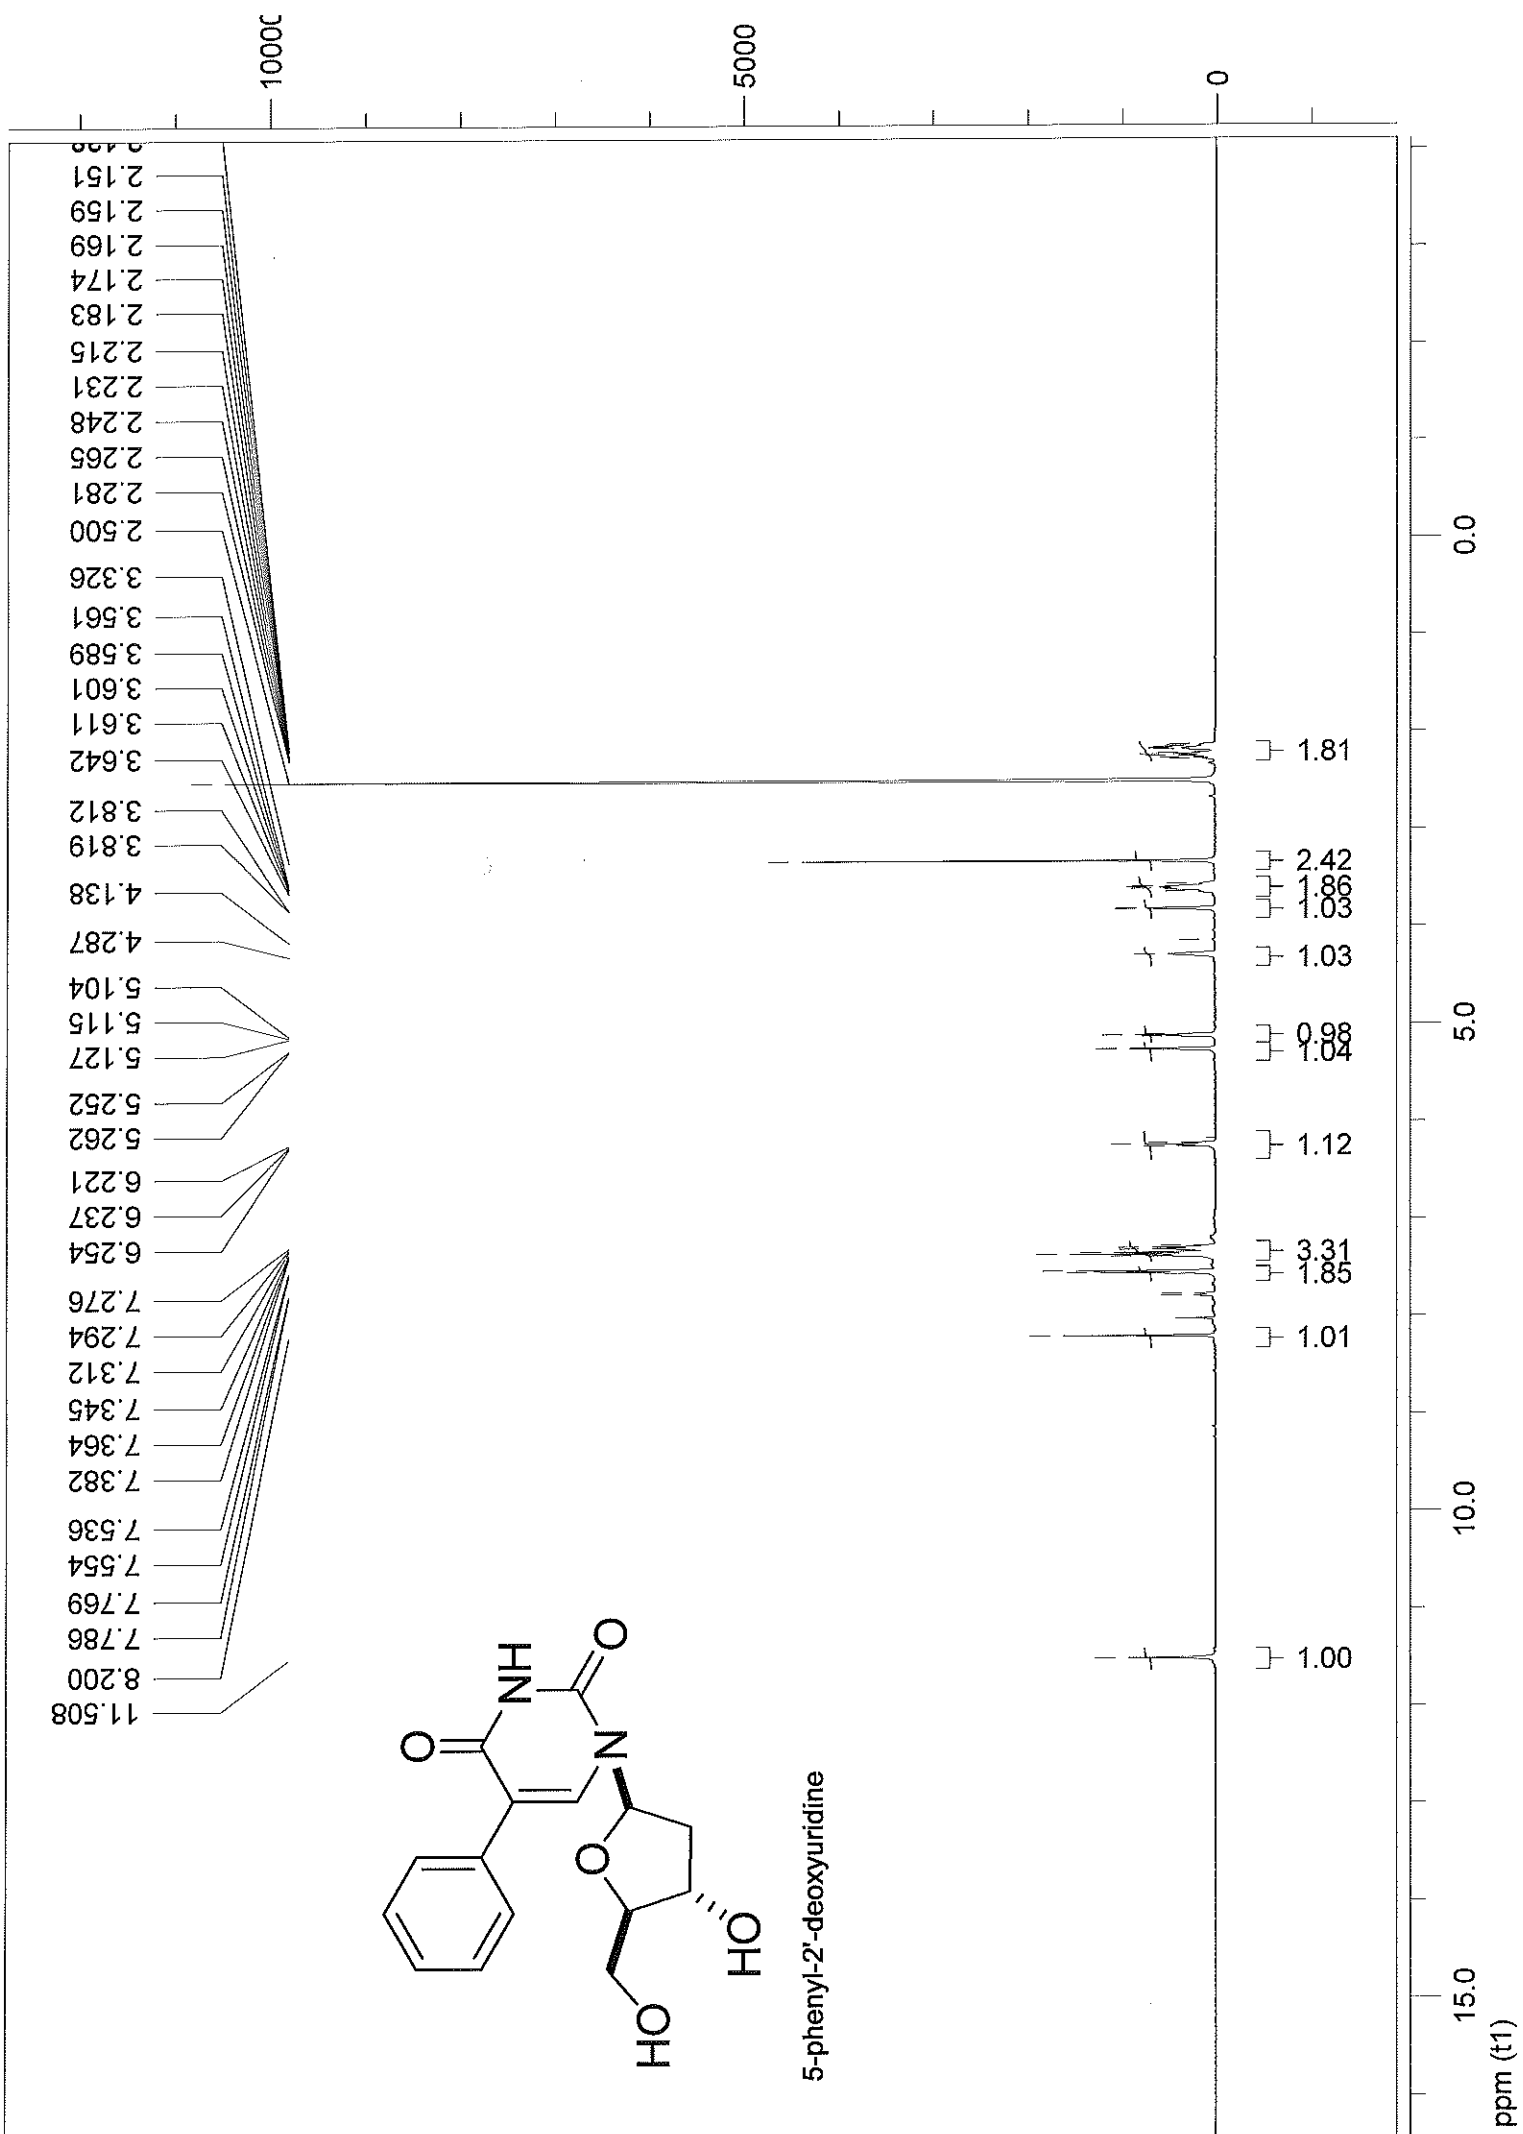

5-phenyl-2'-deoxyuridine

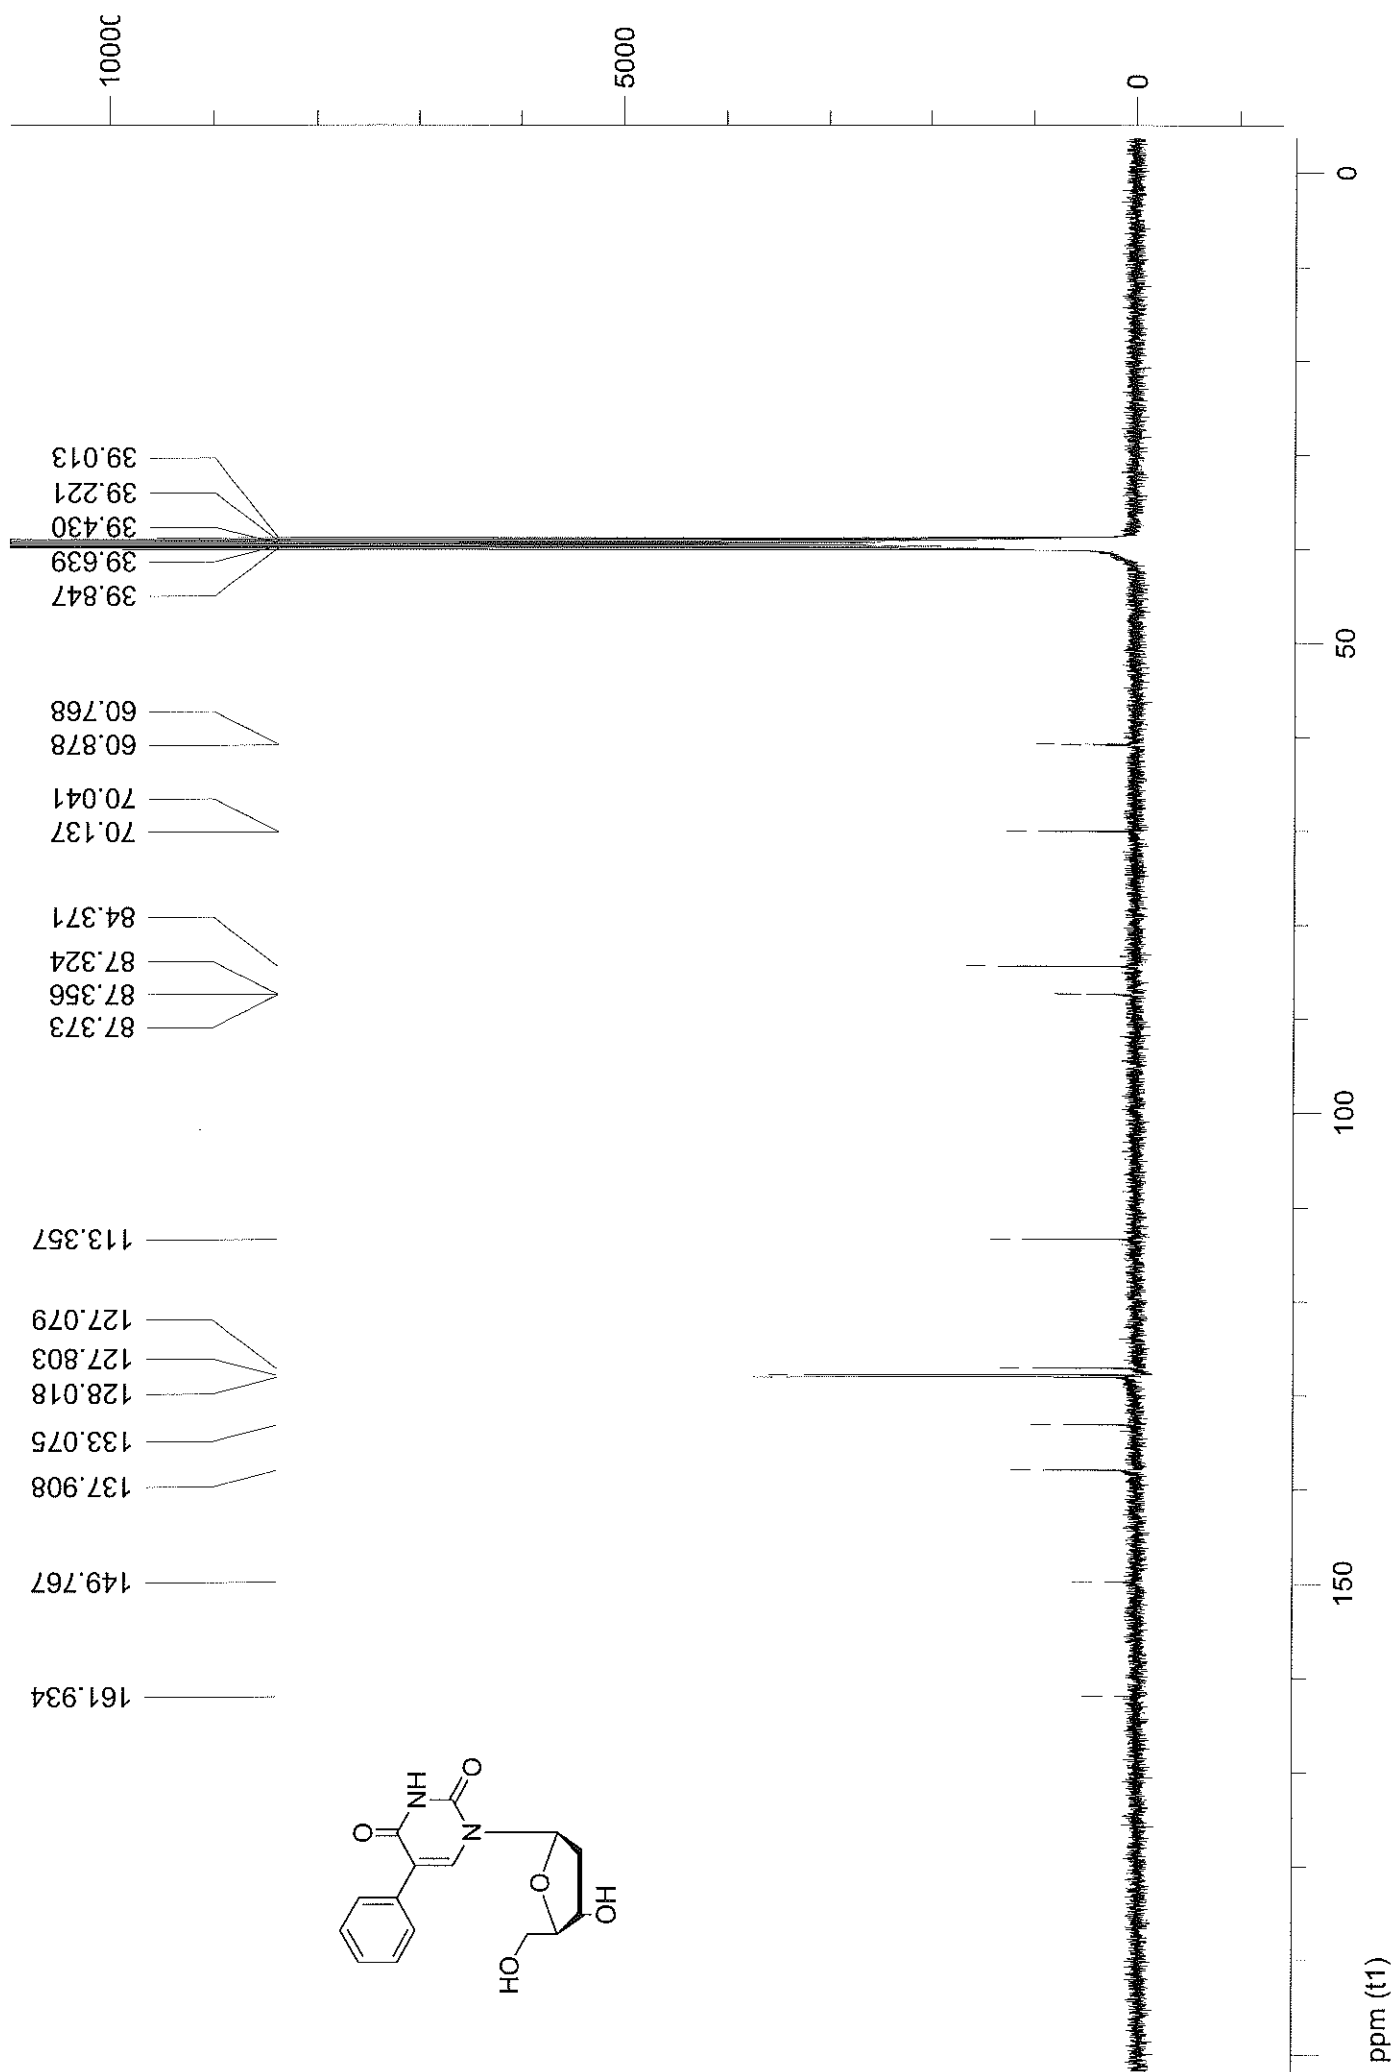

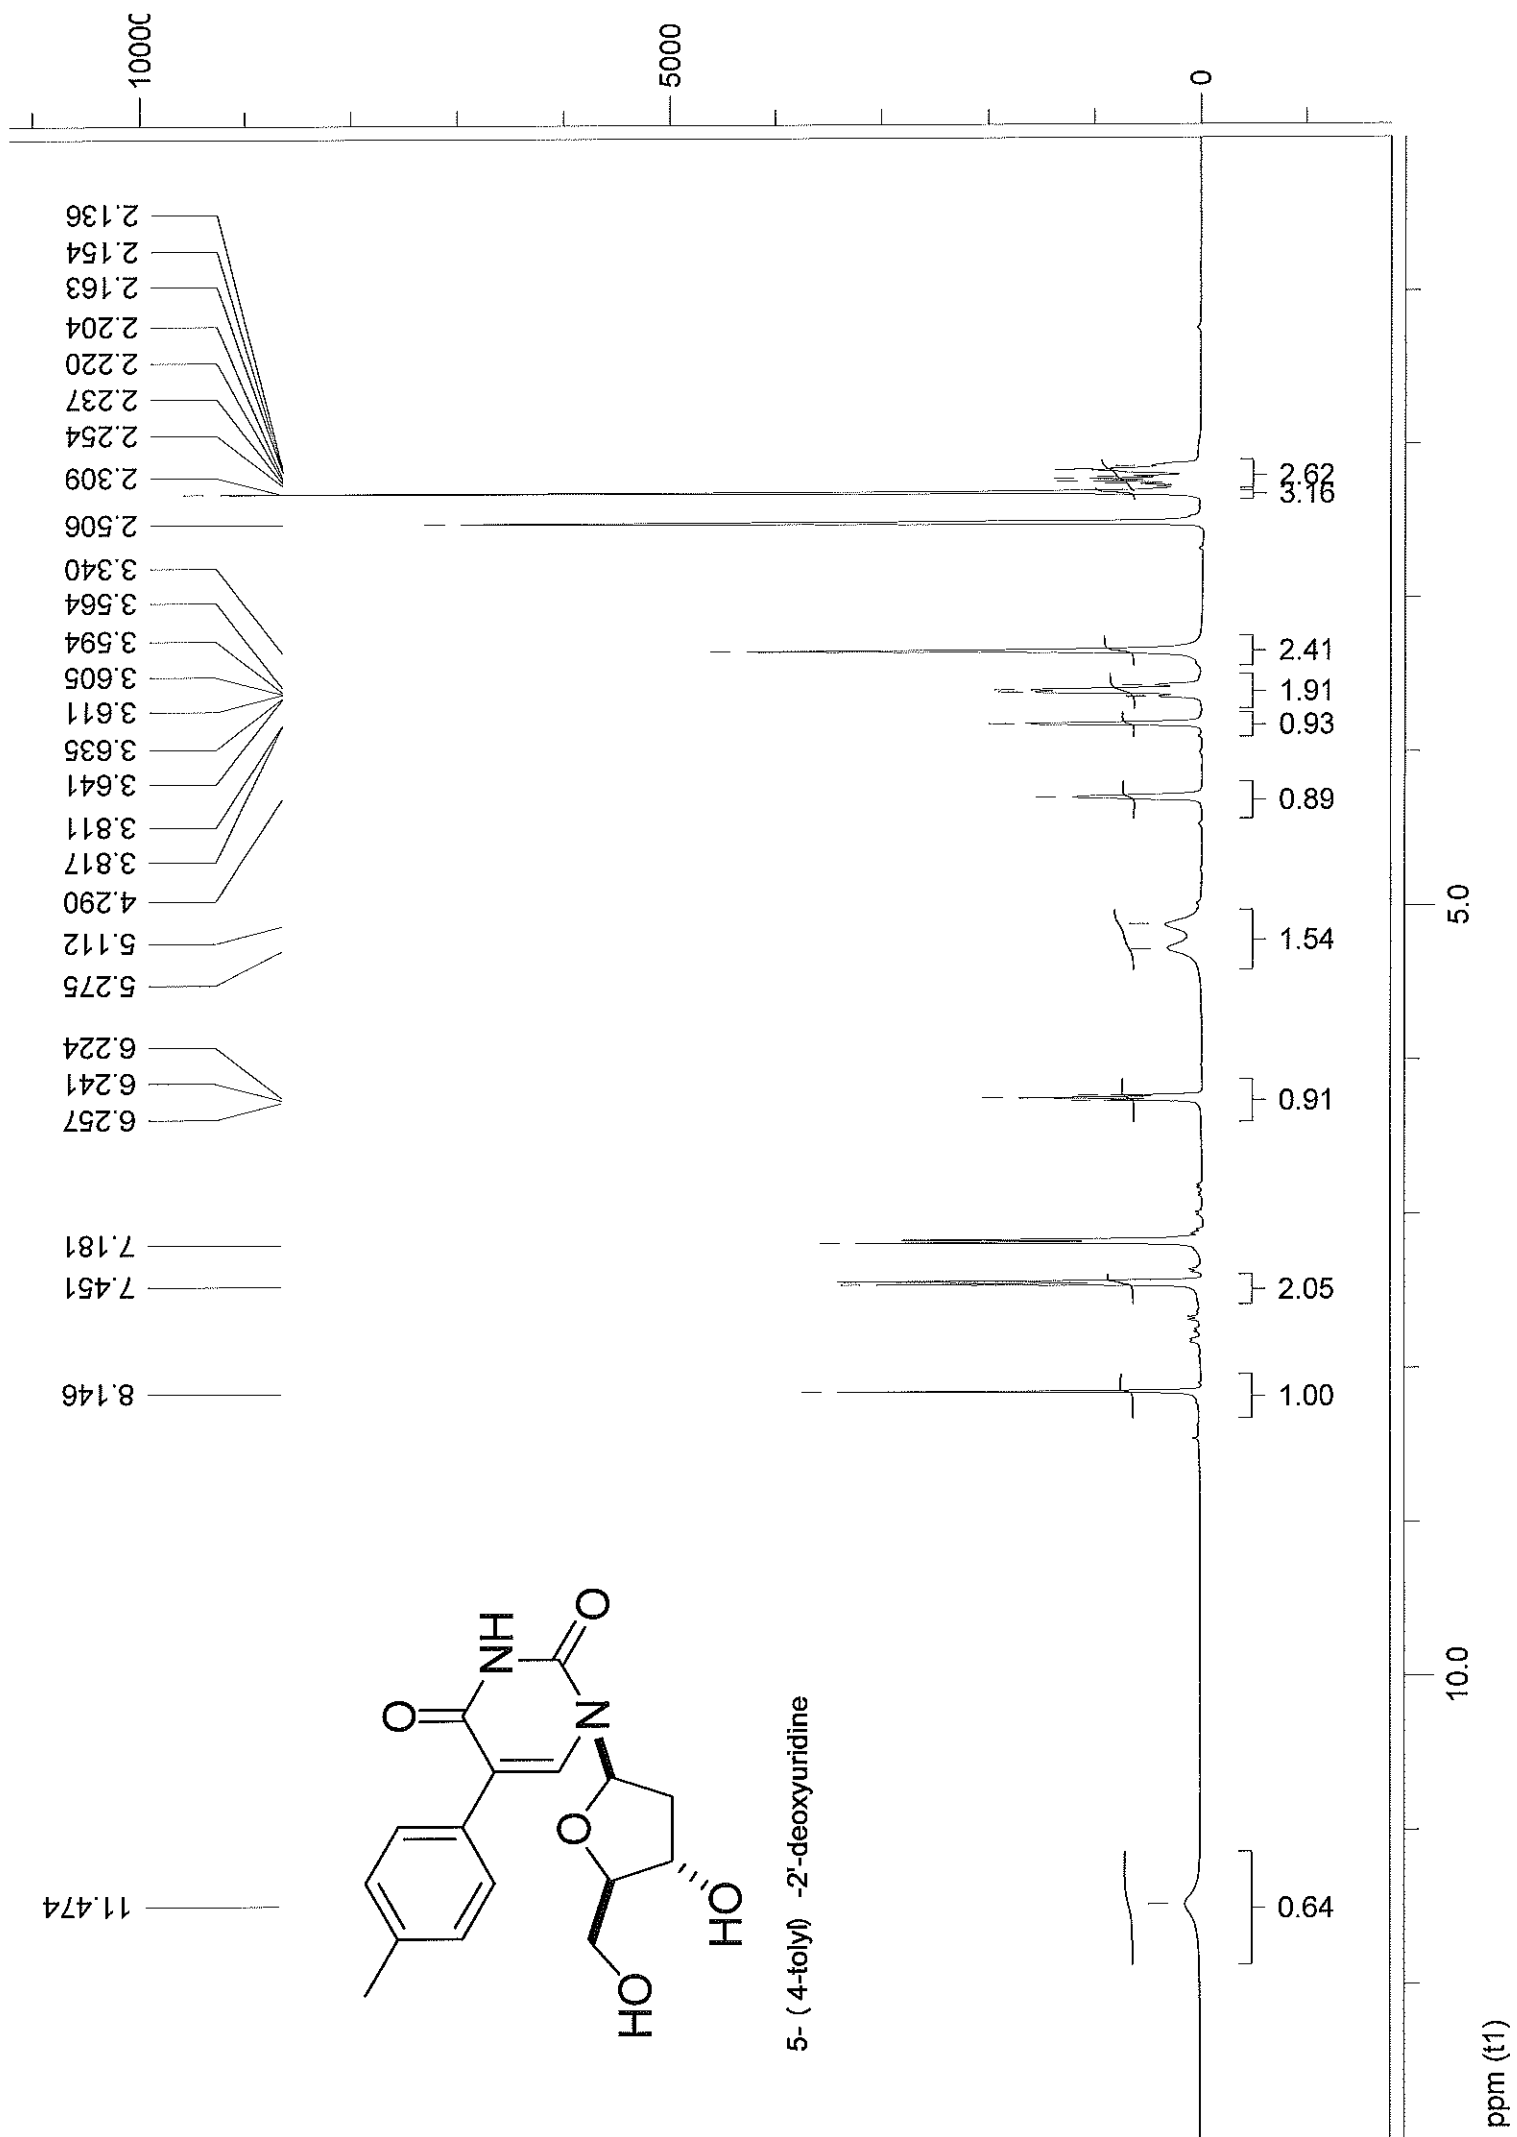

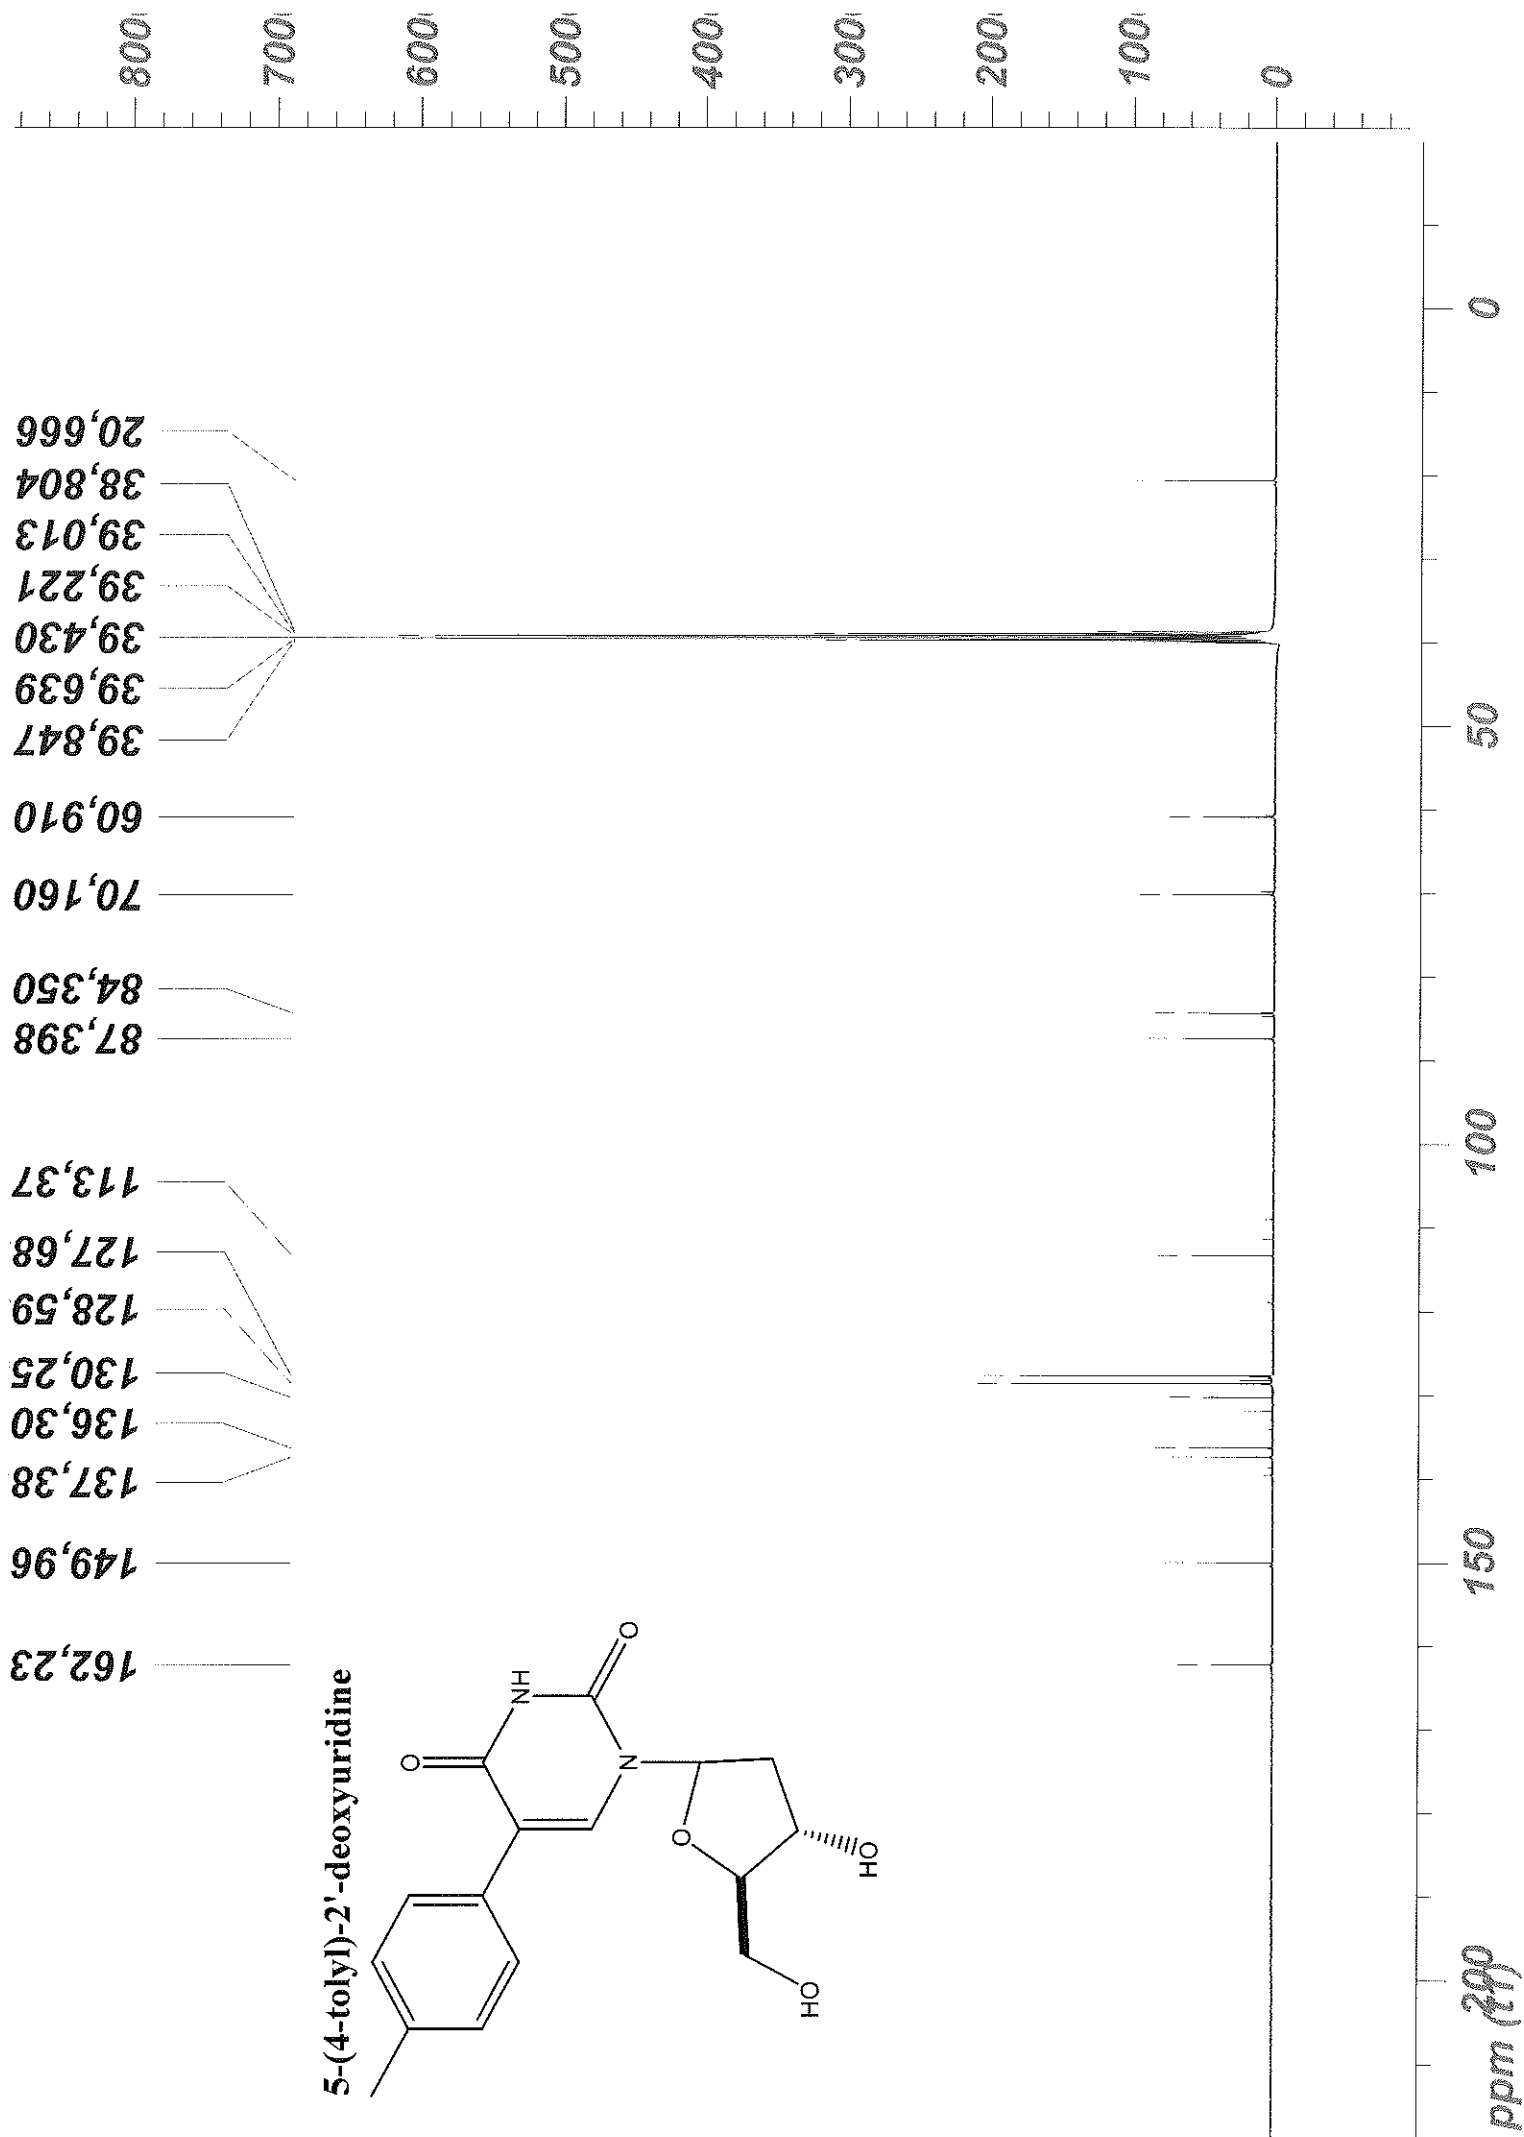

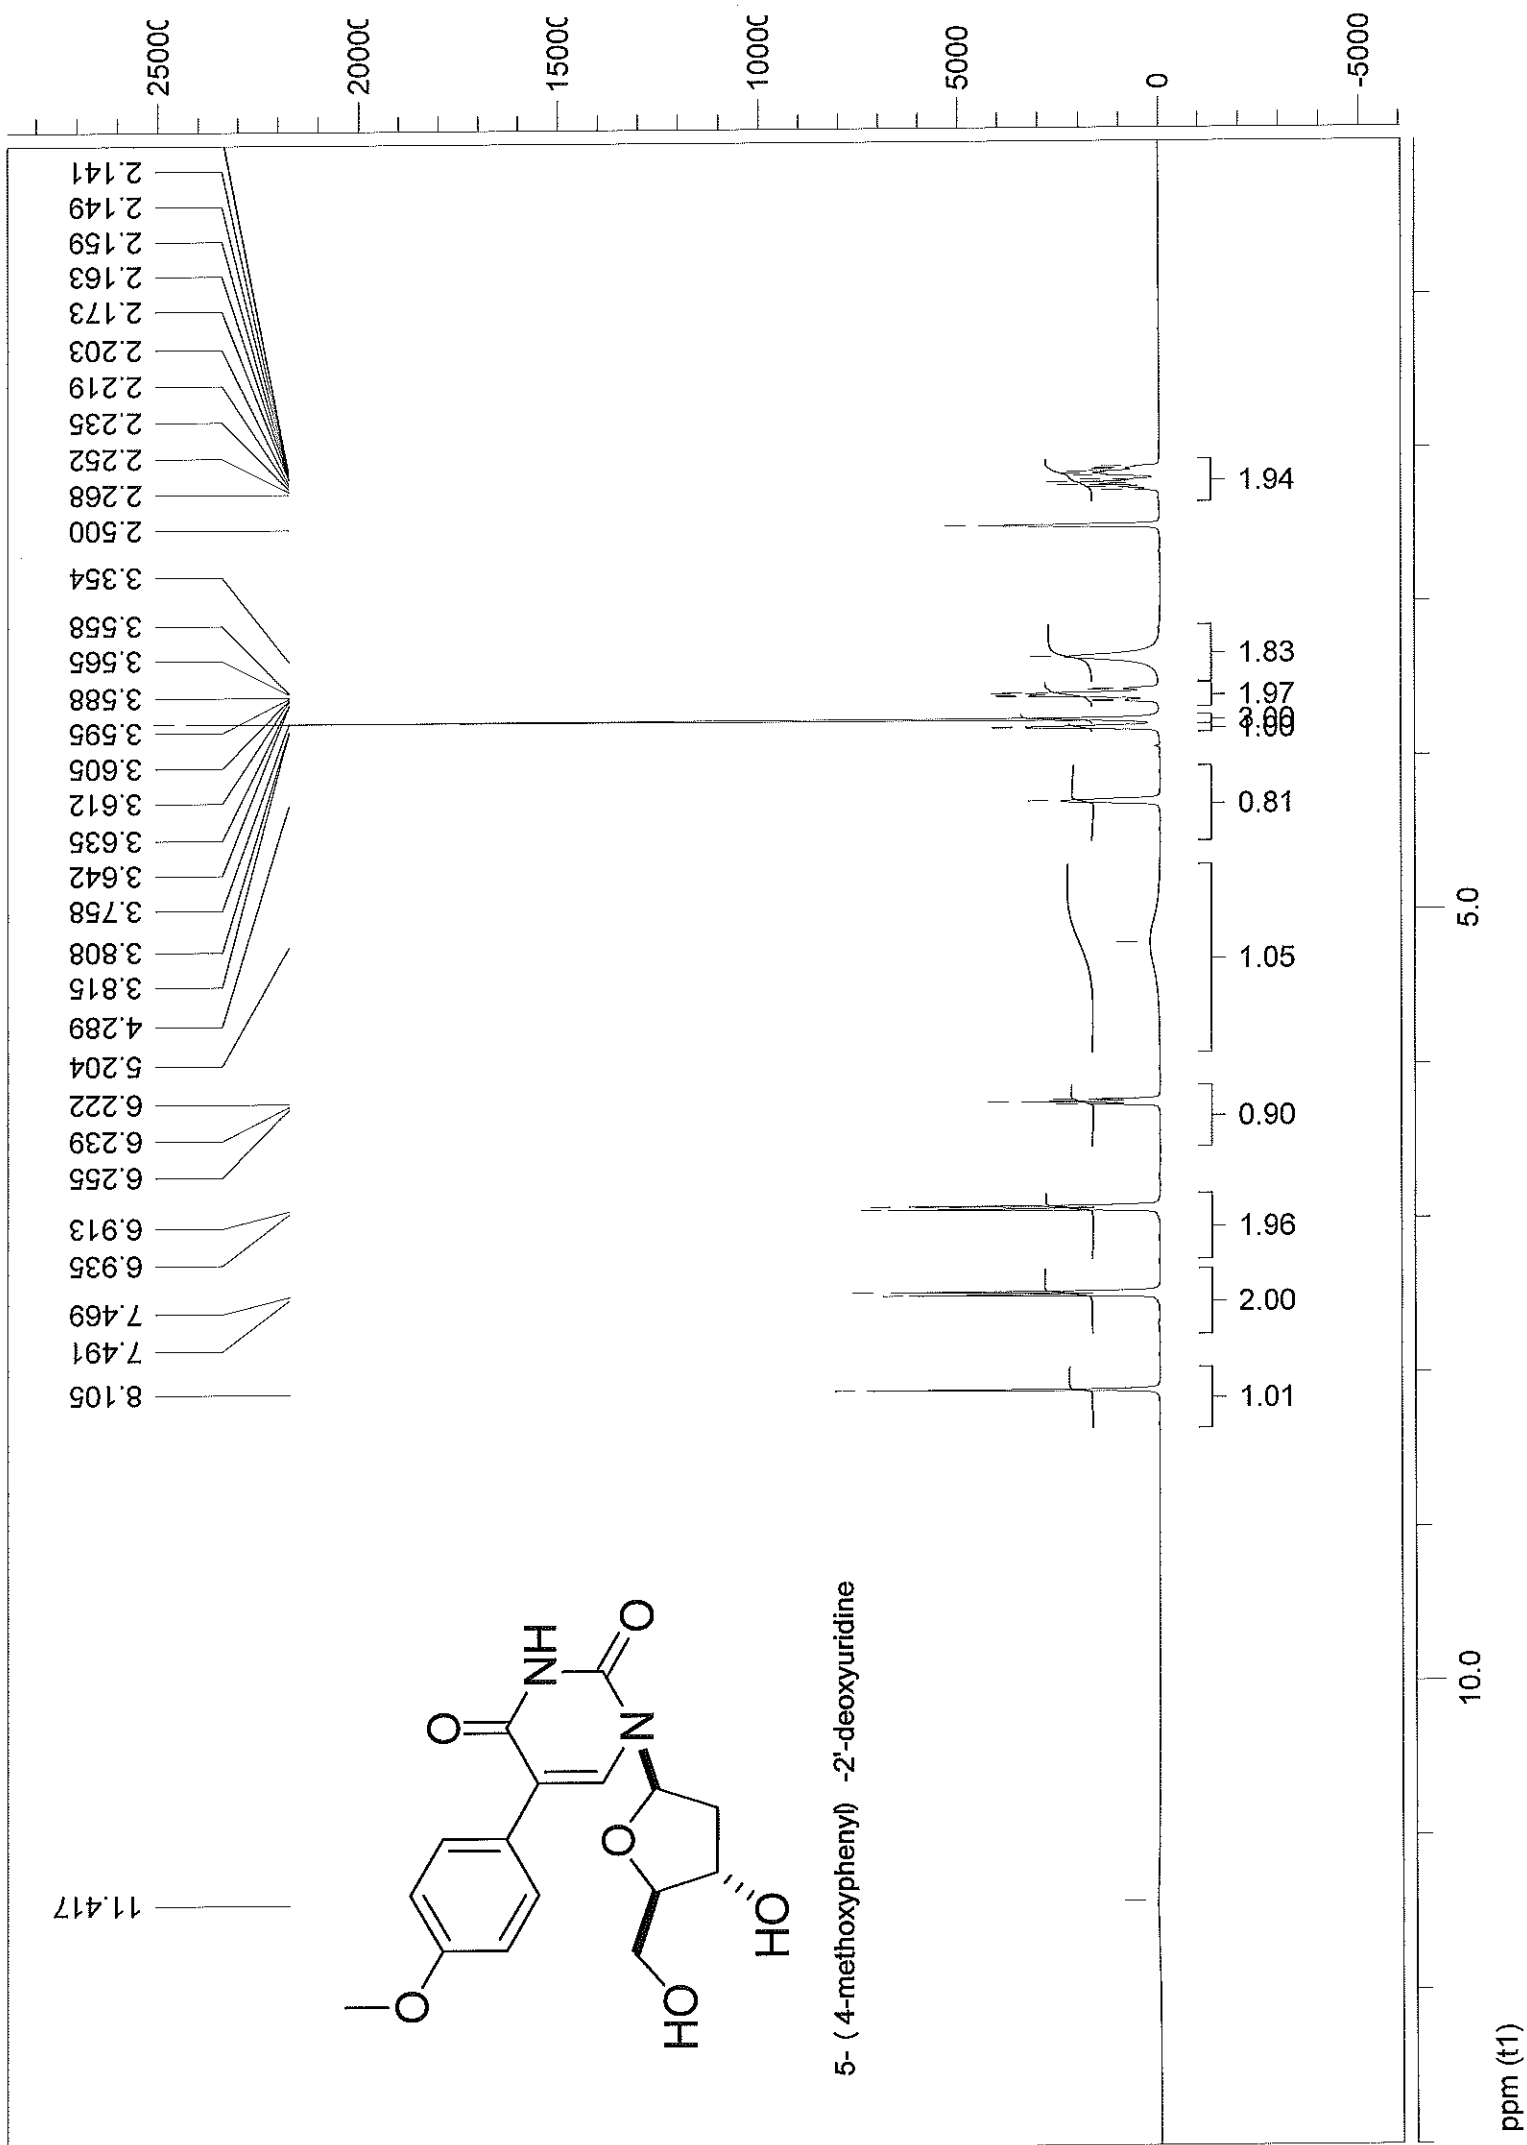

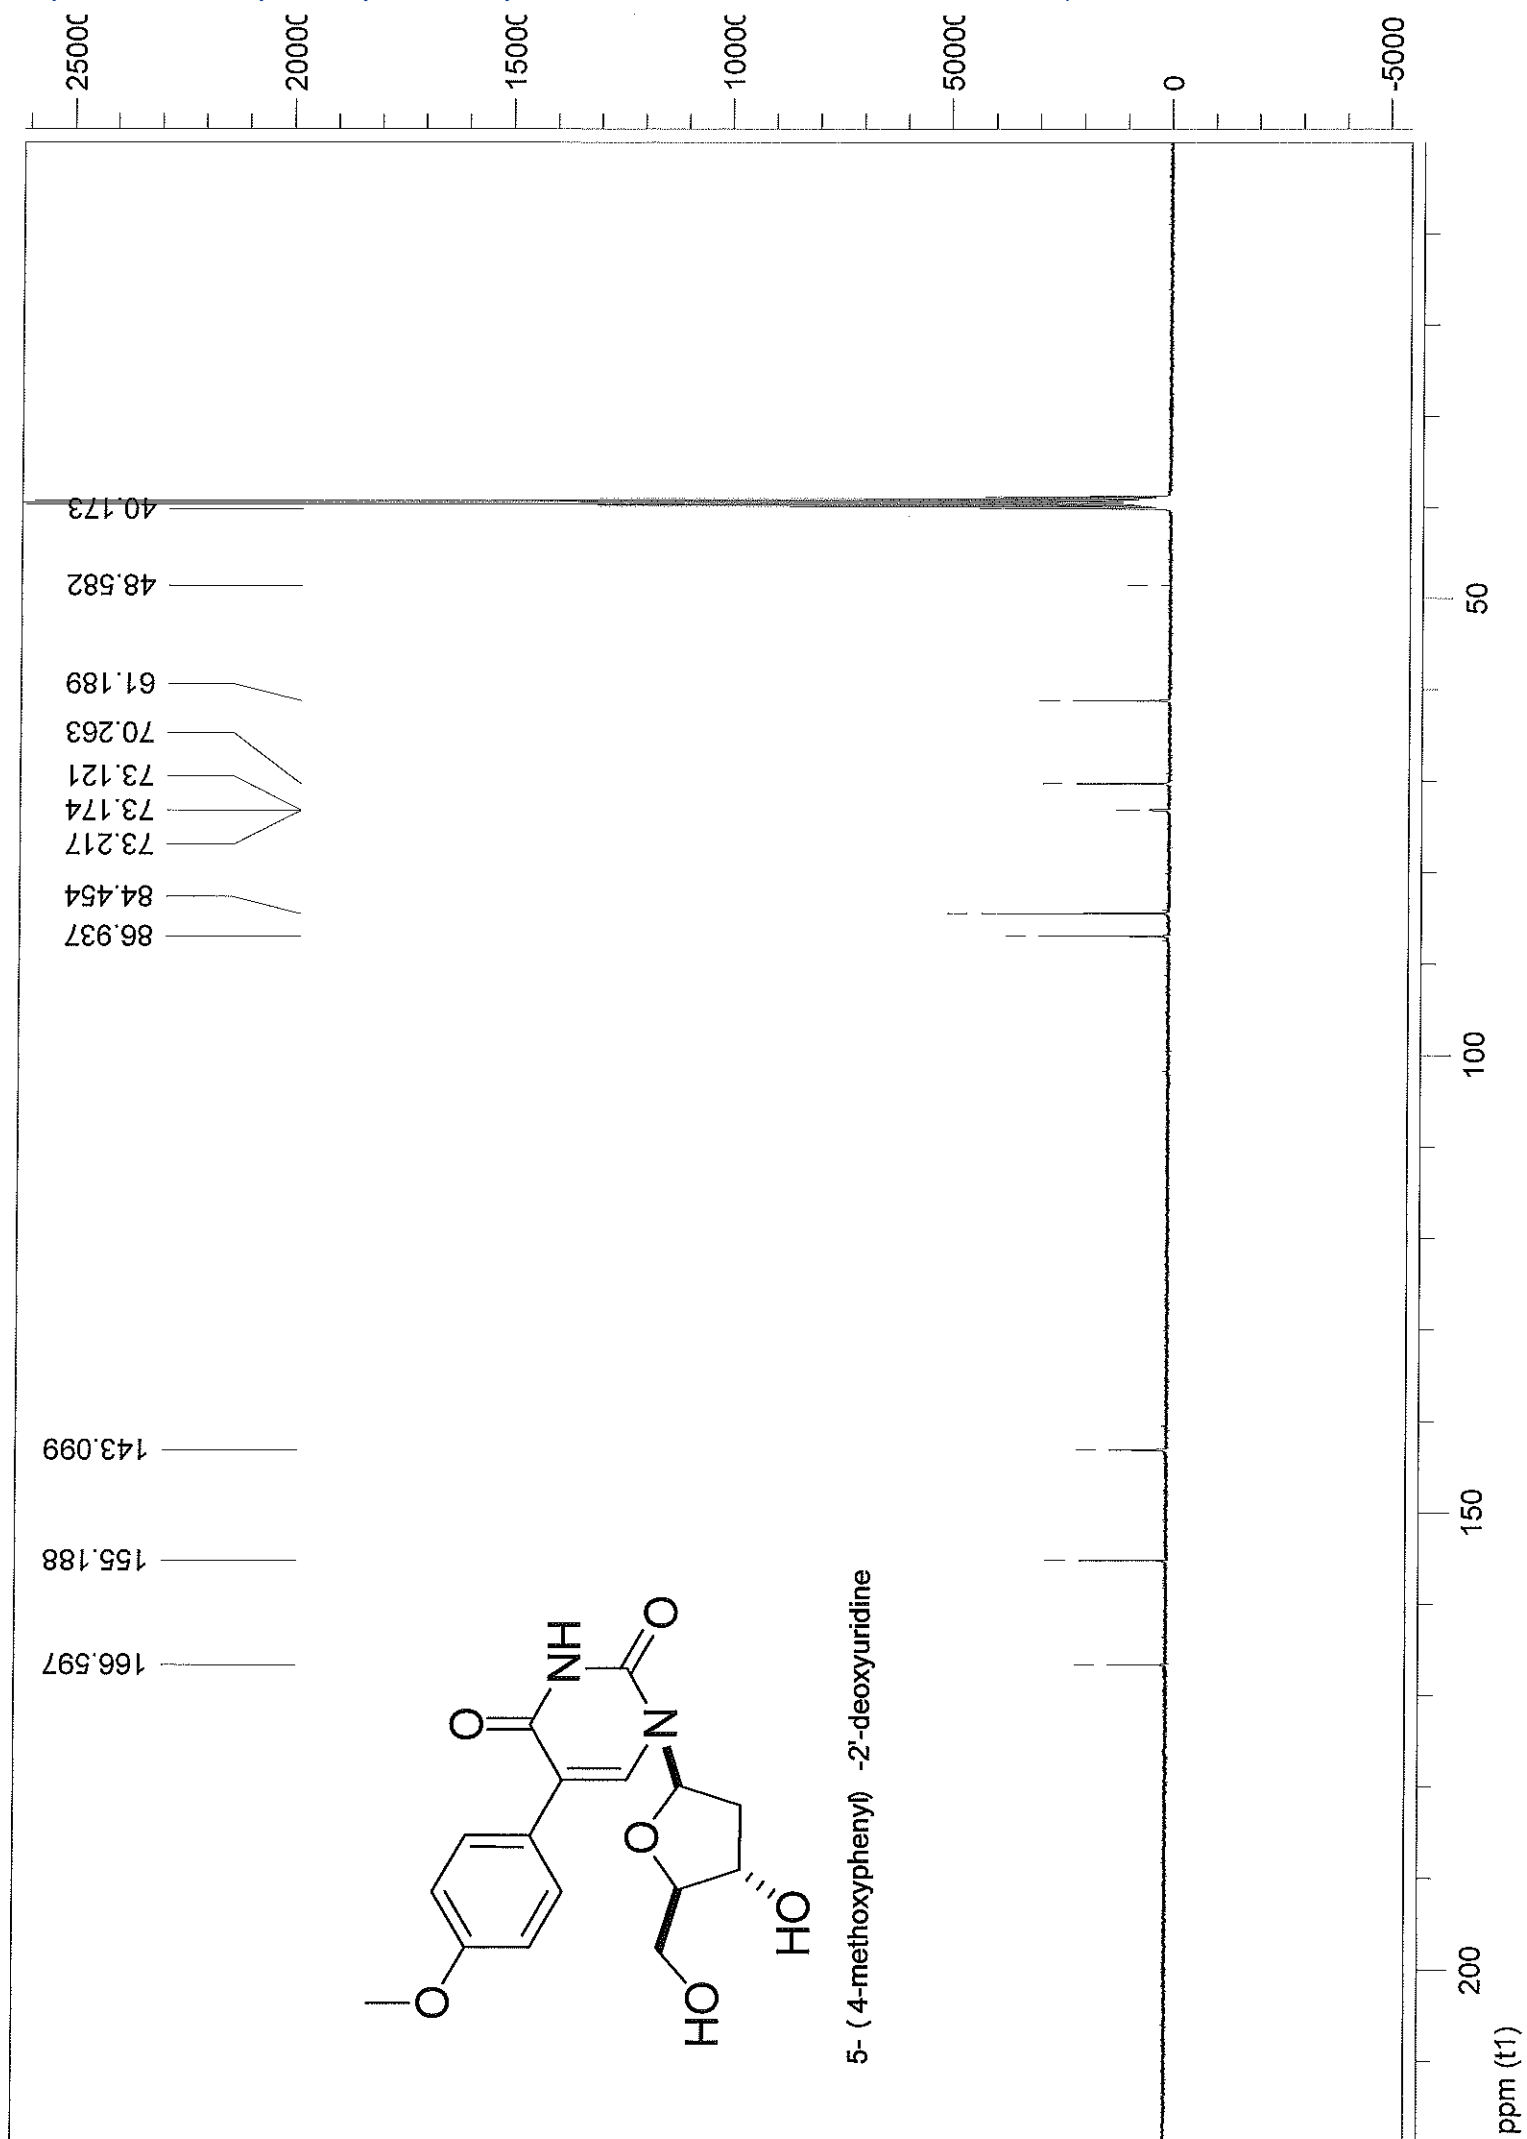

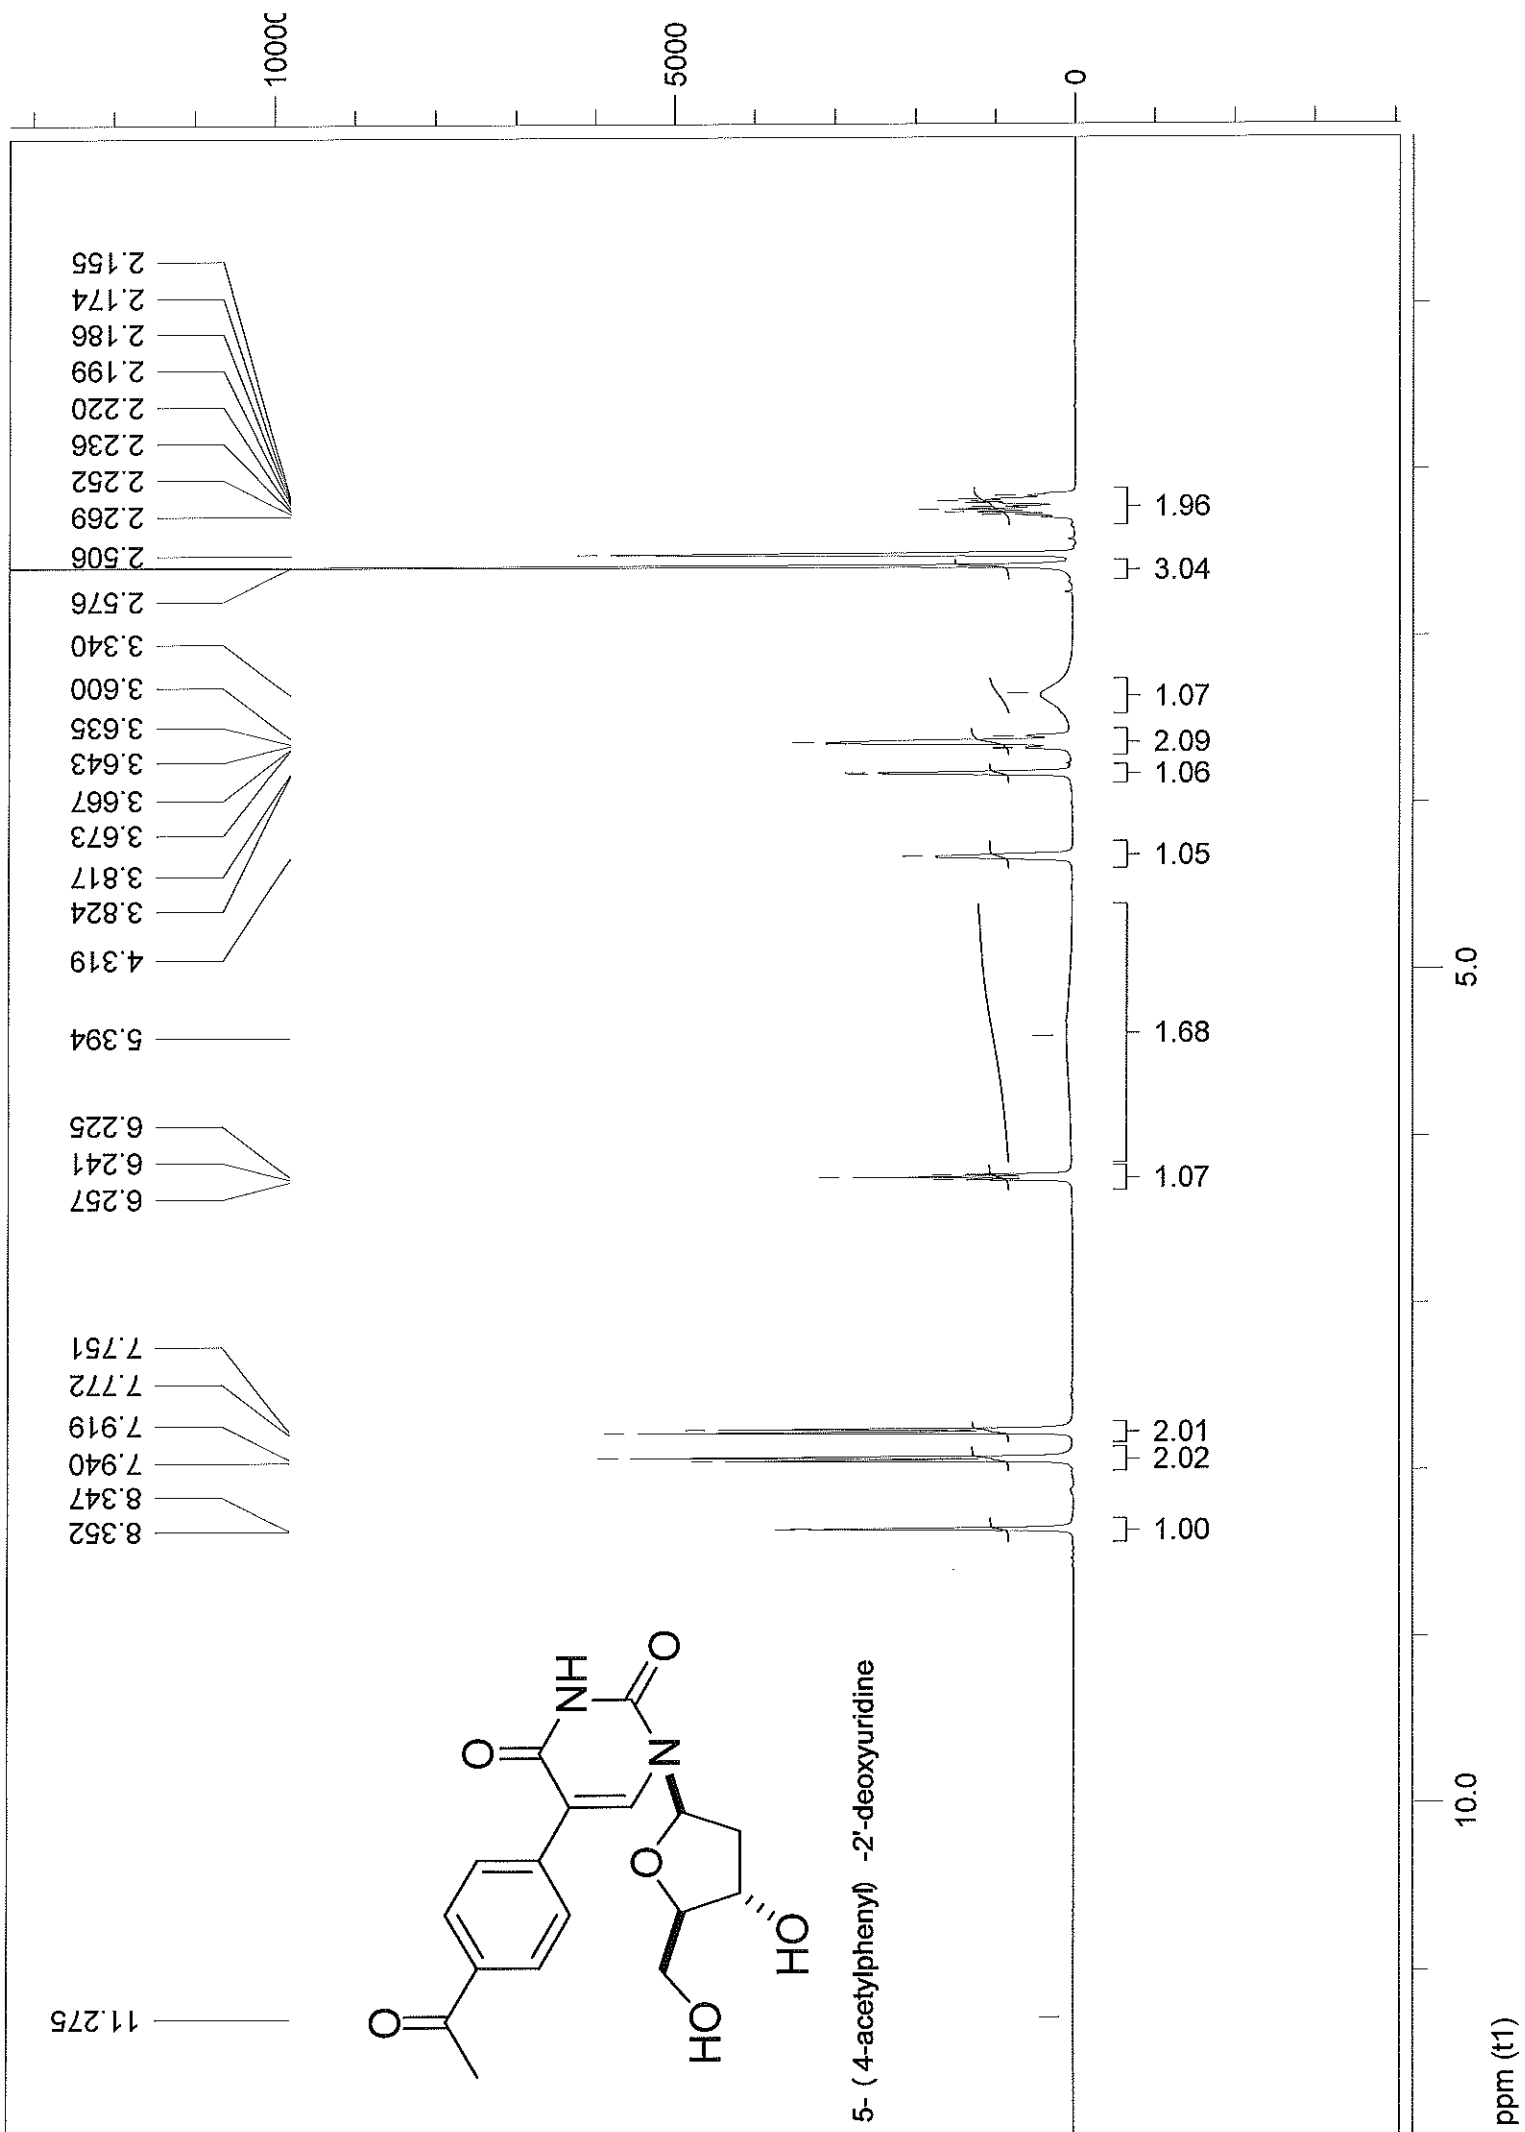

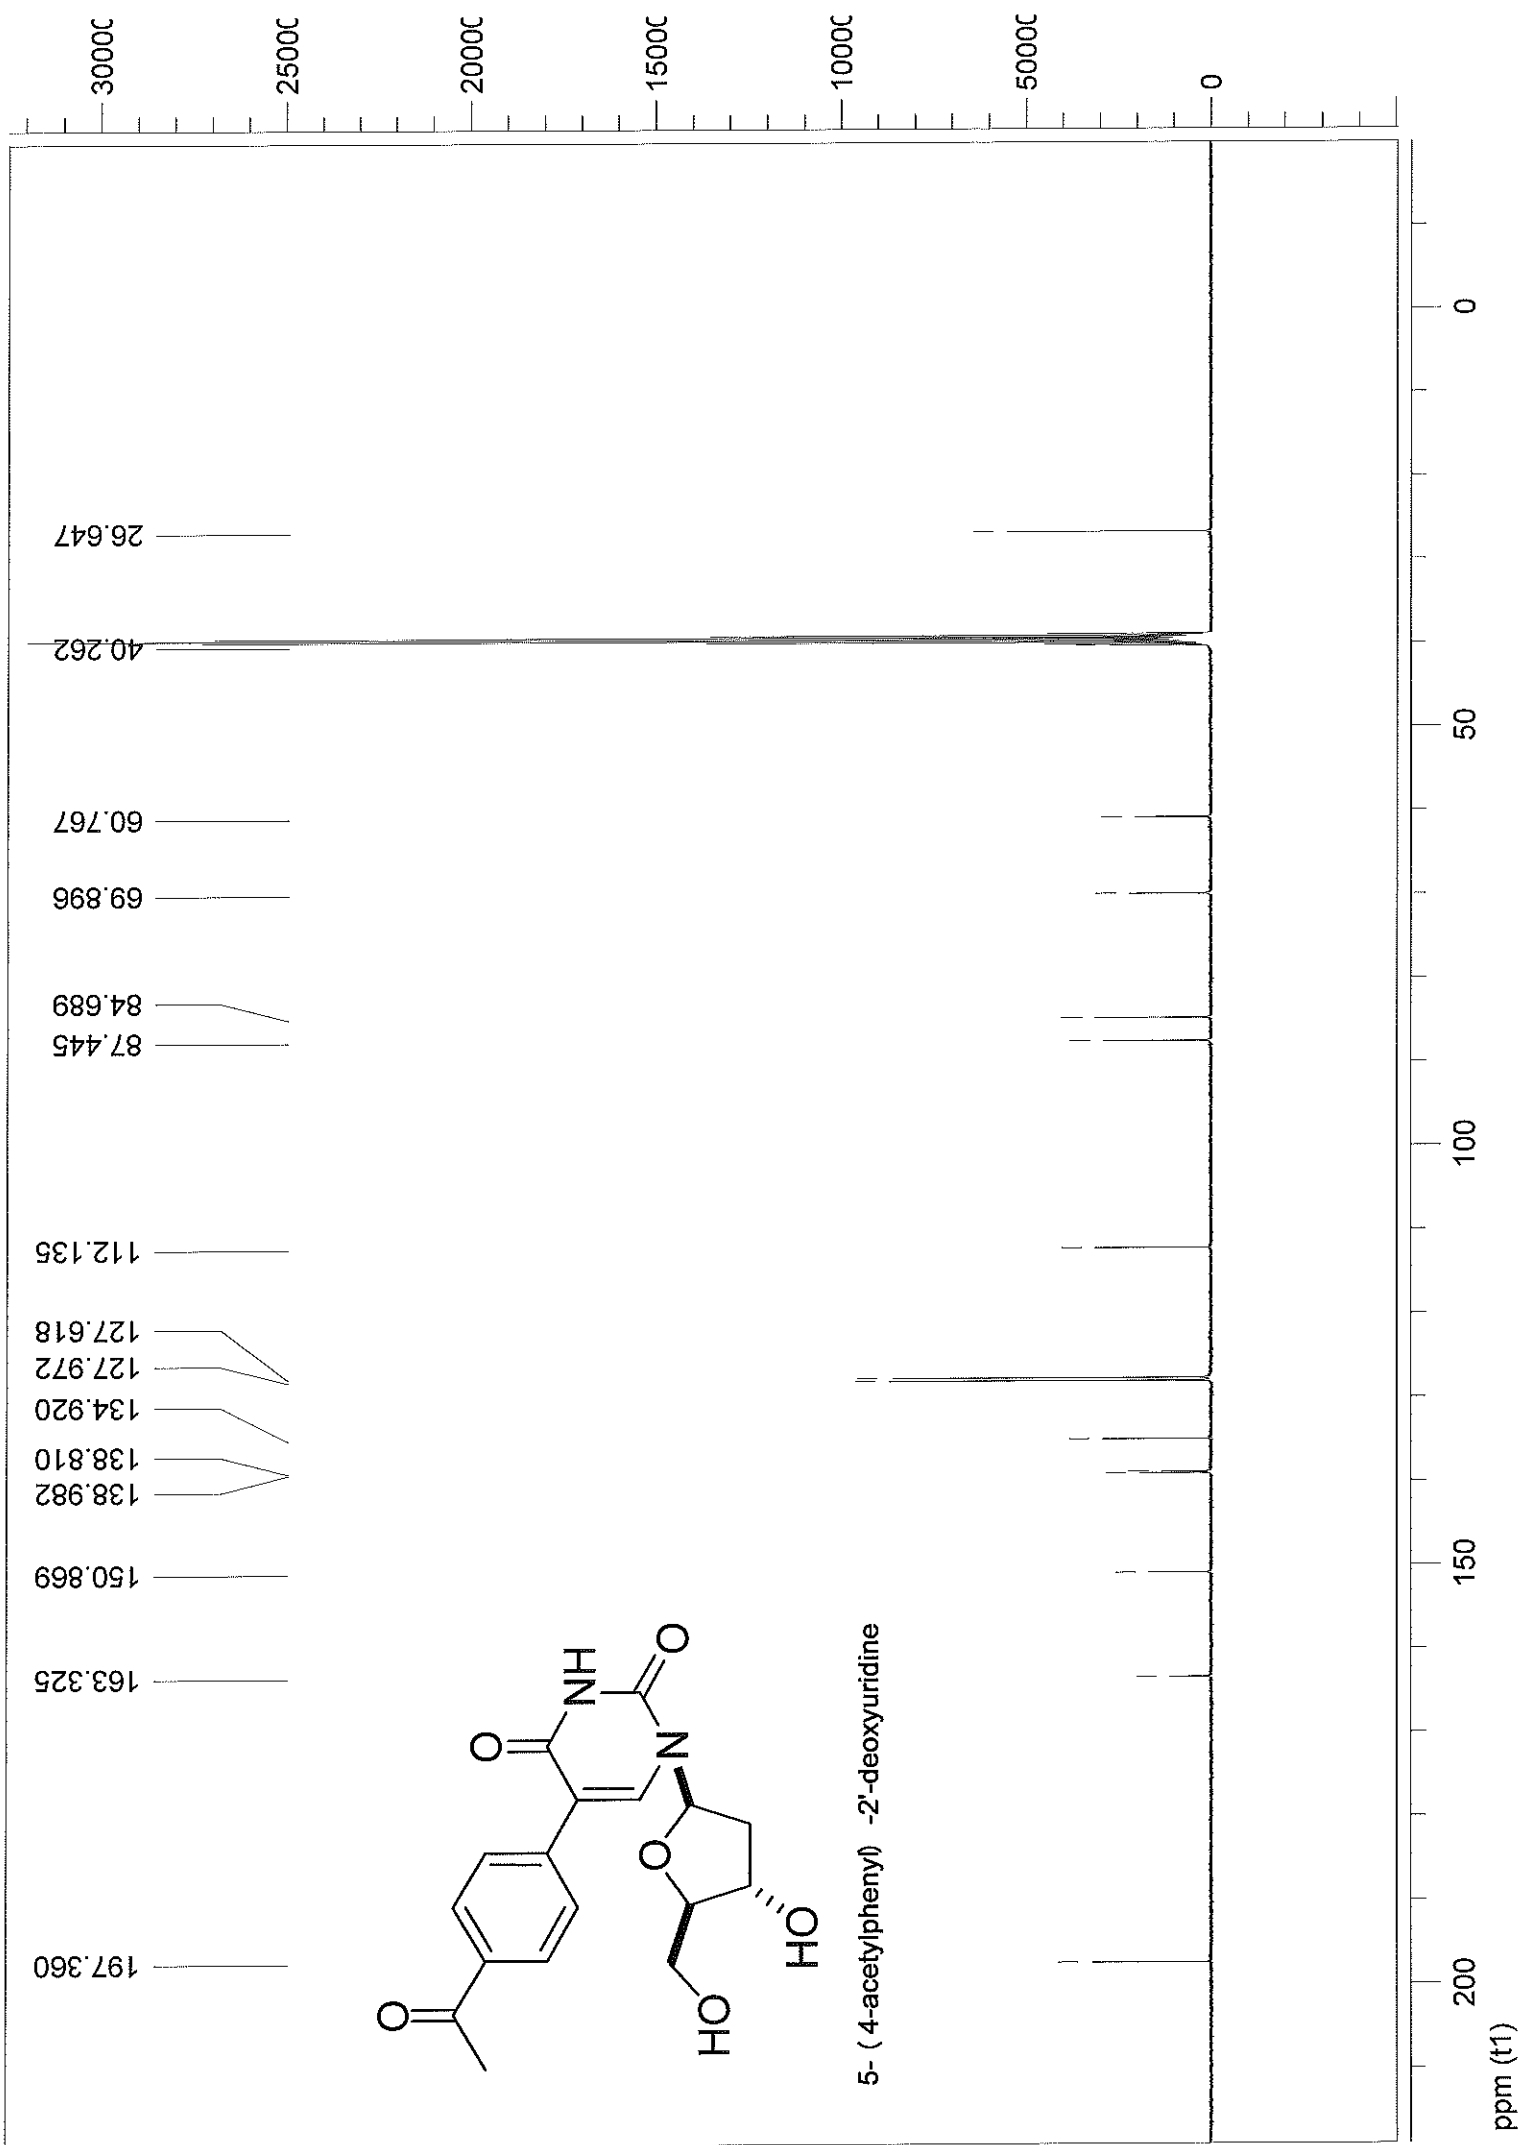



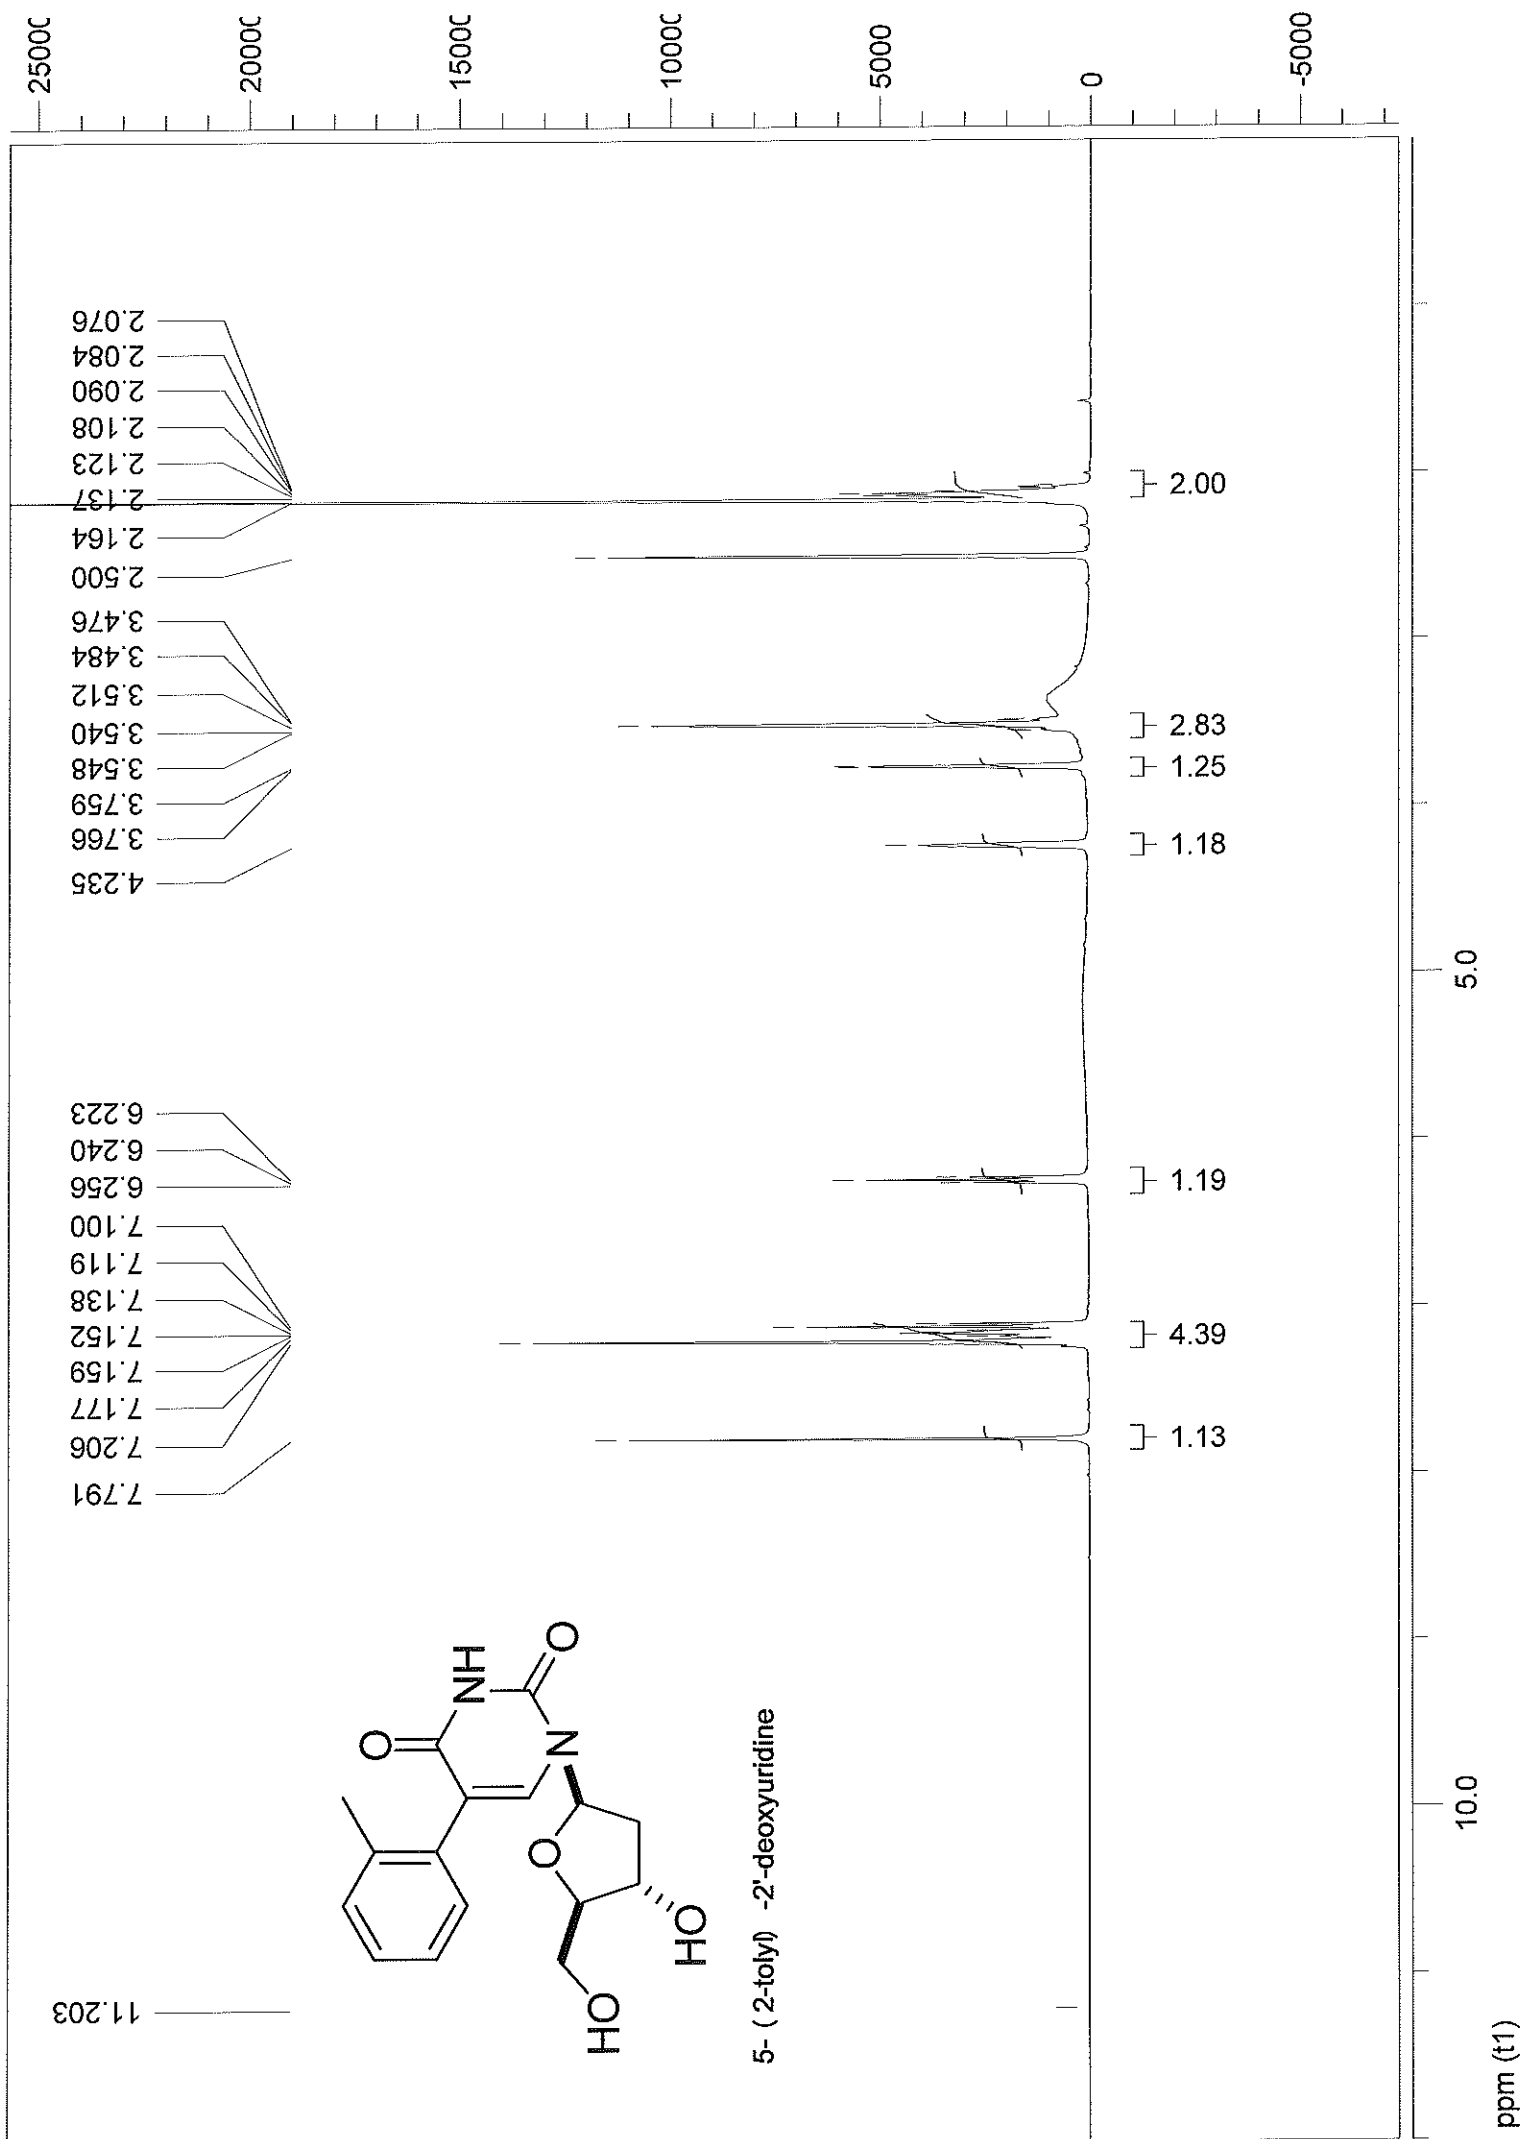

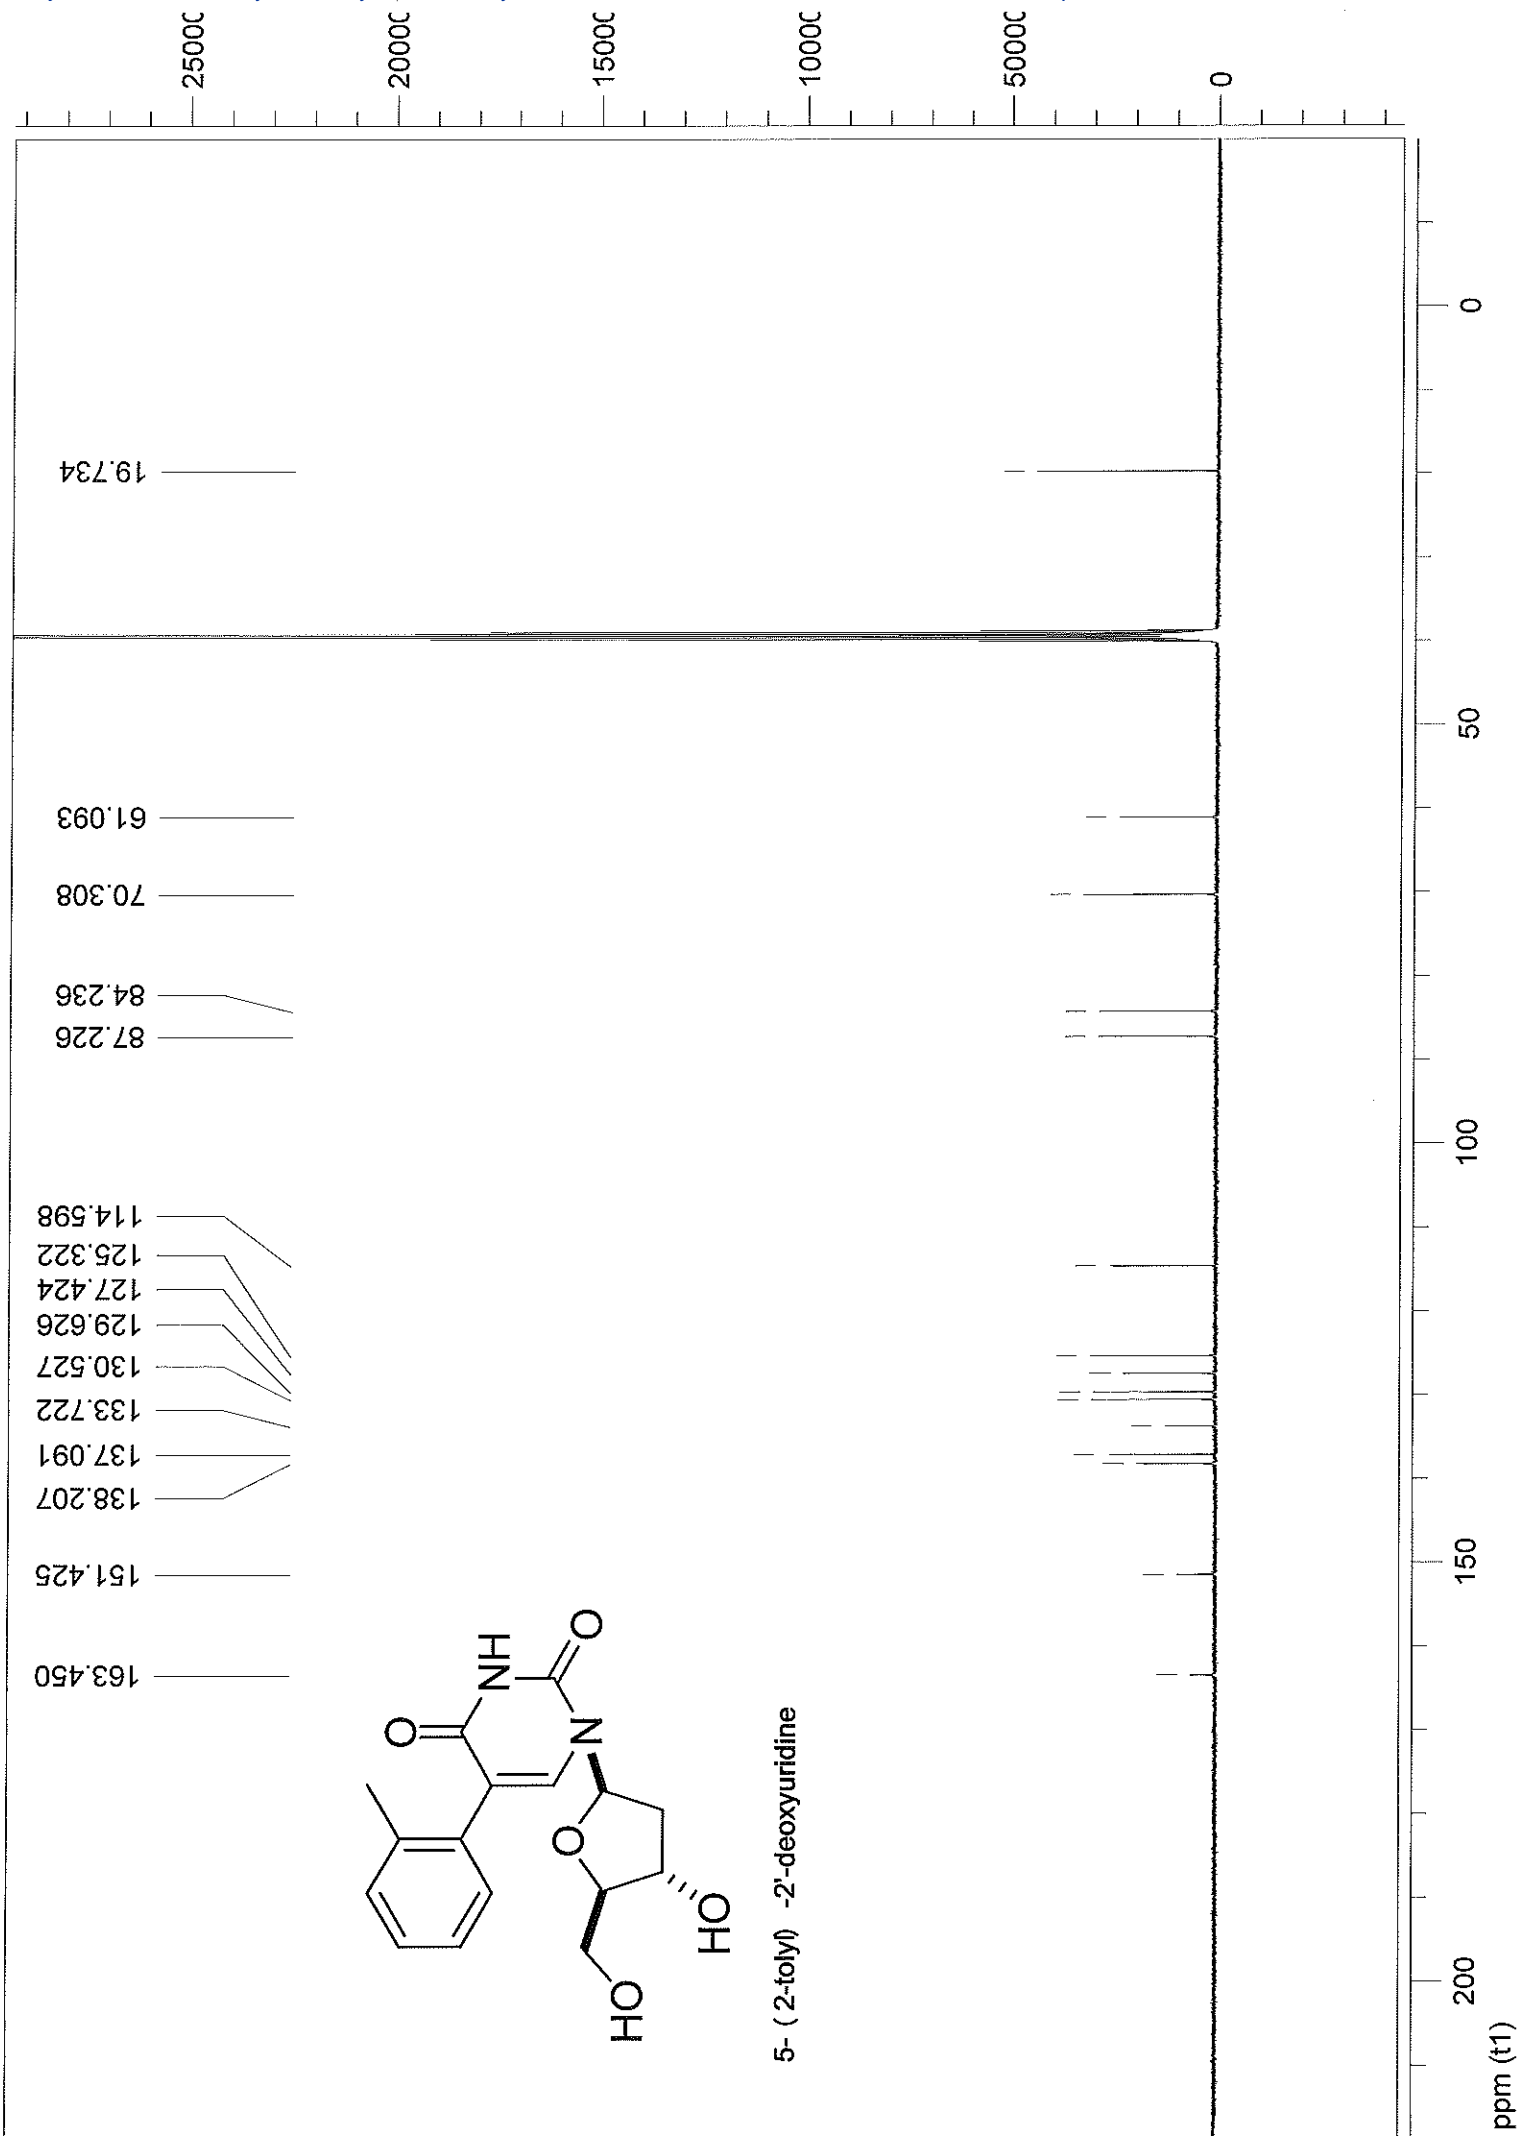

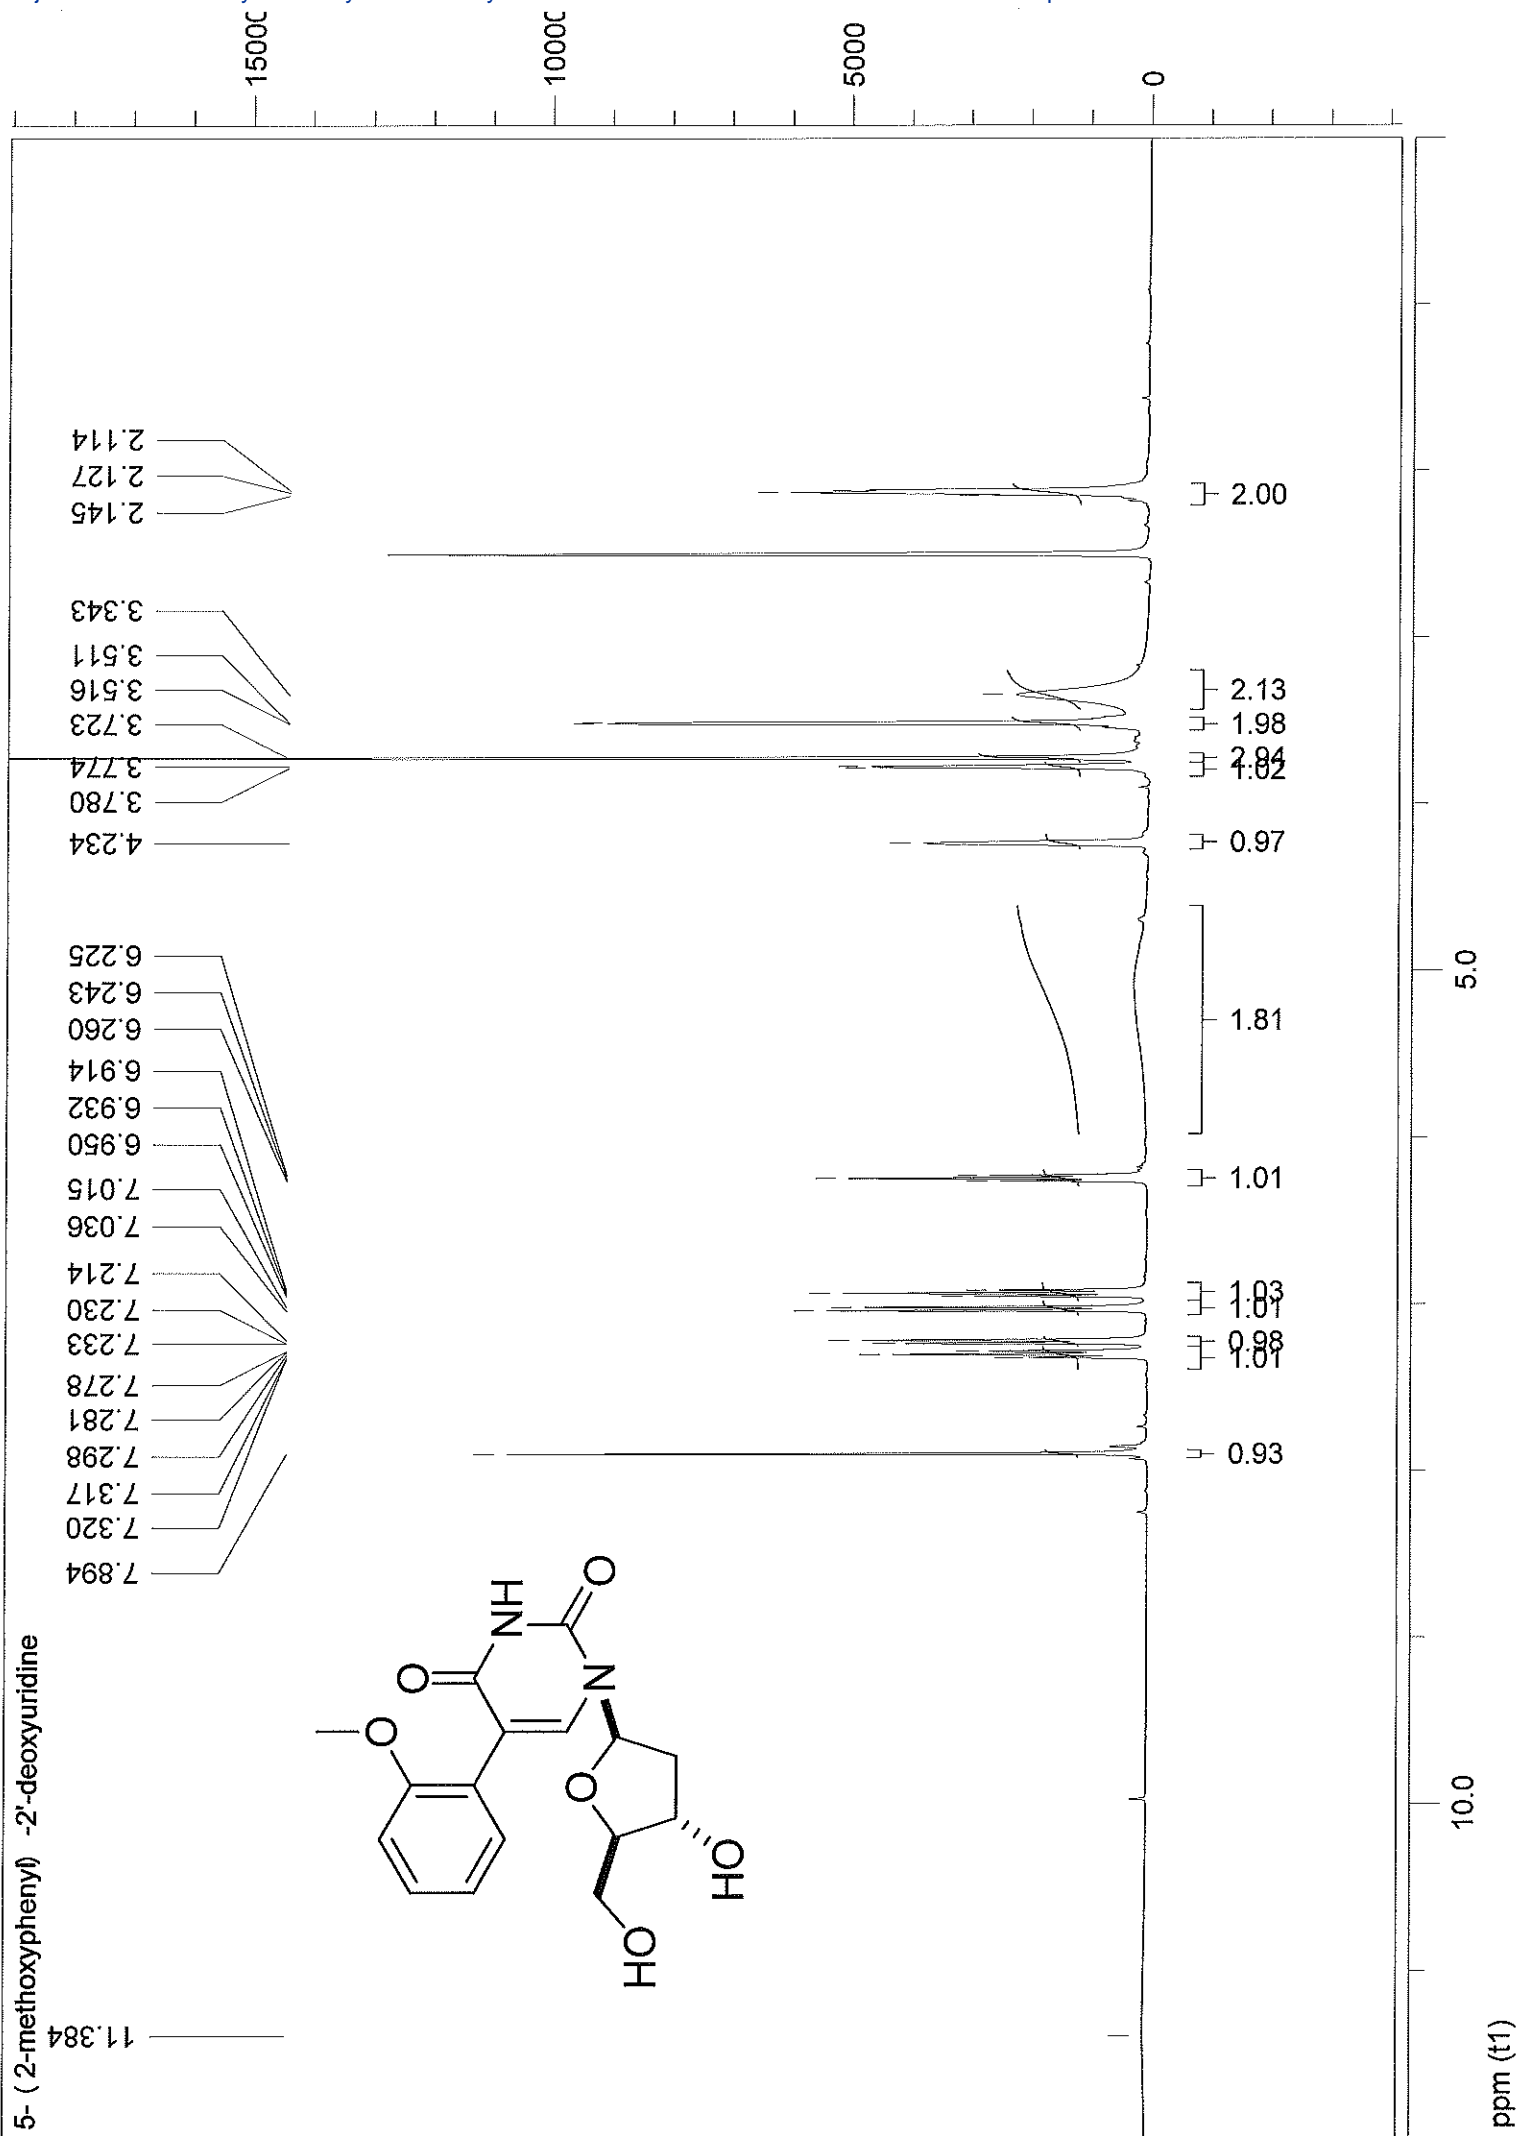

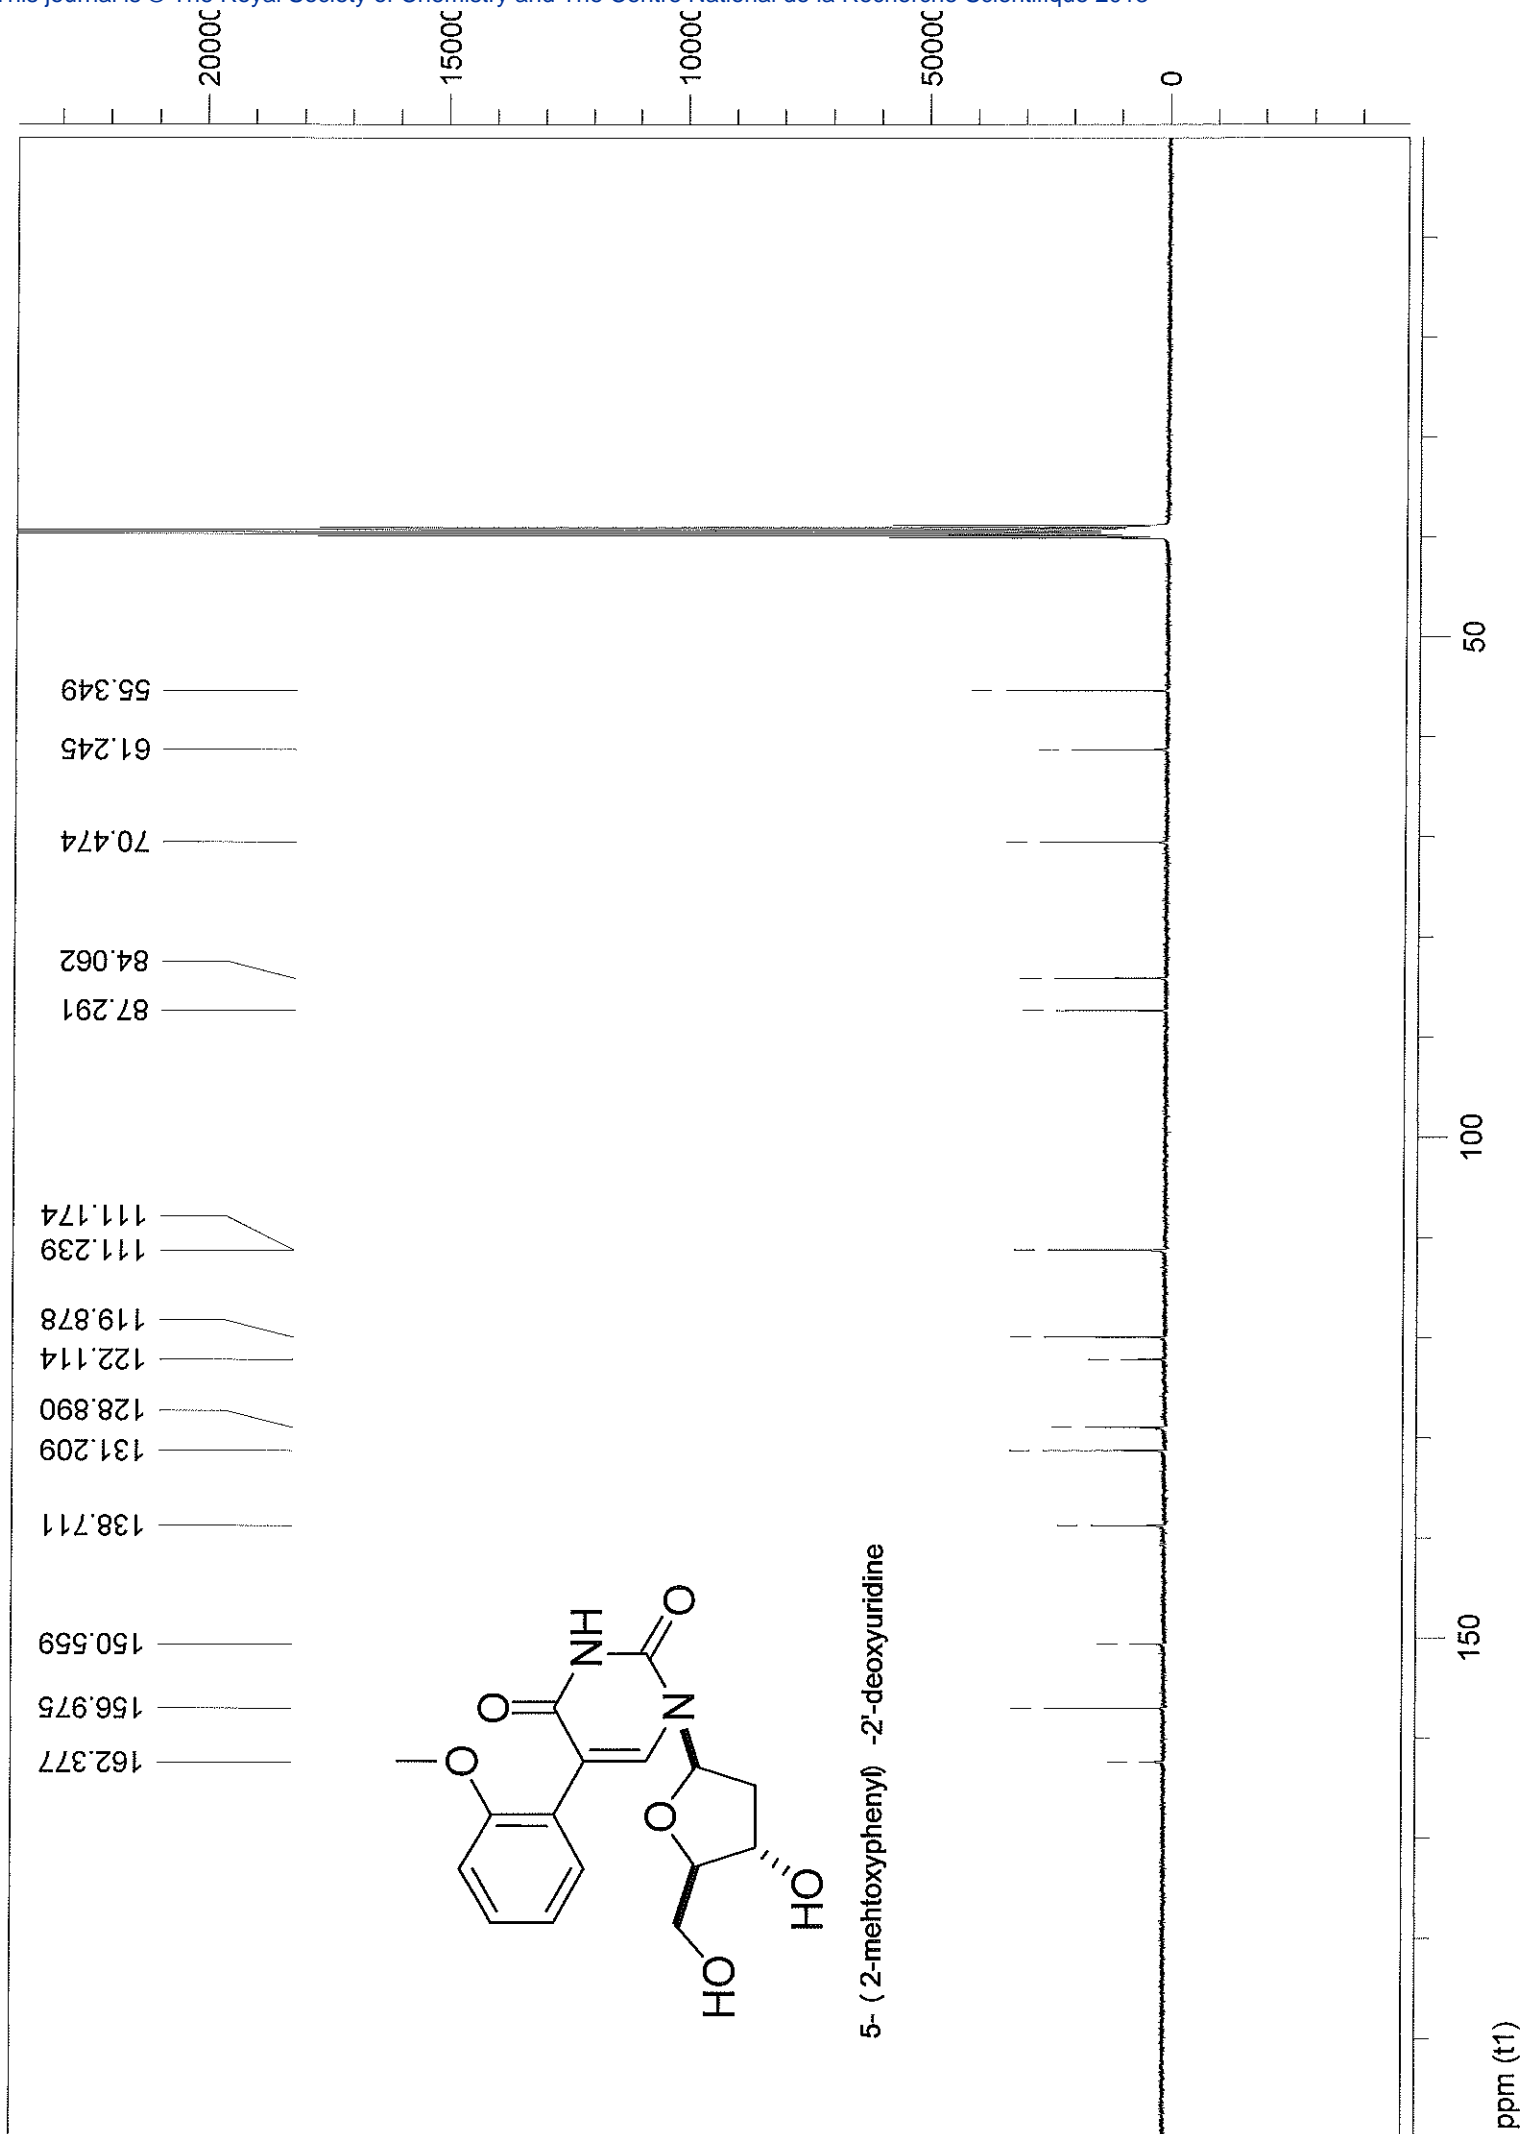

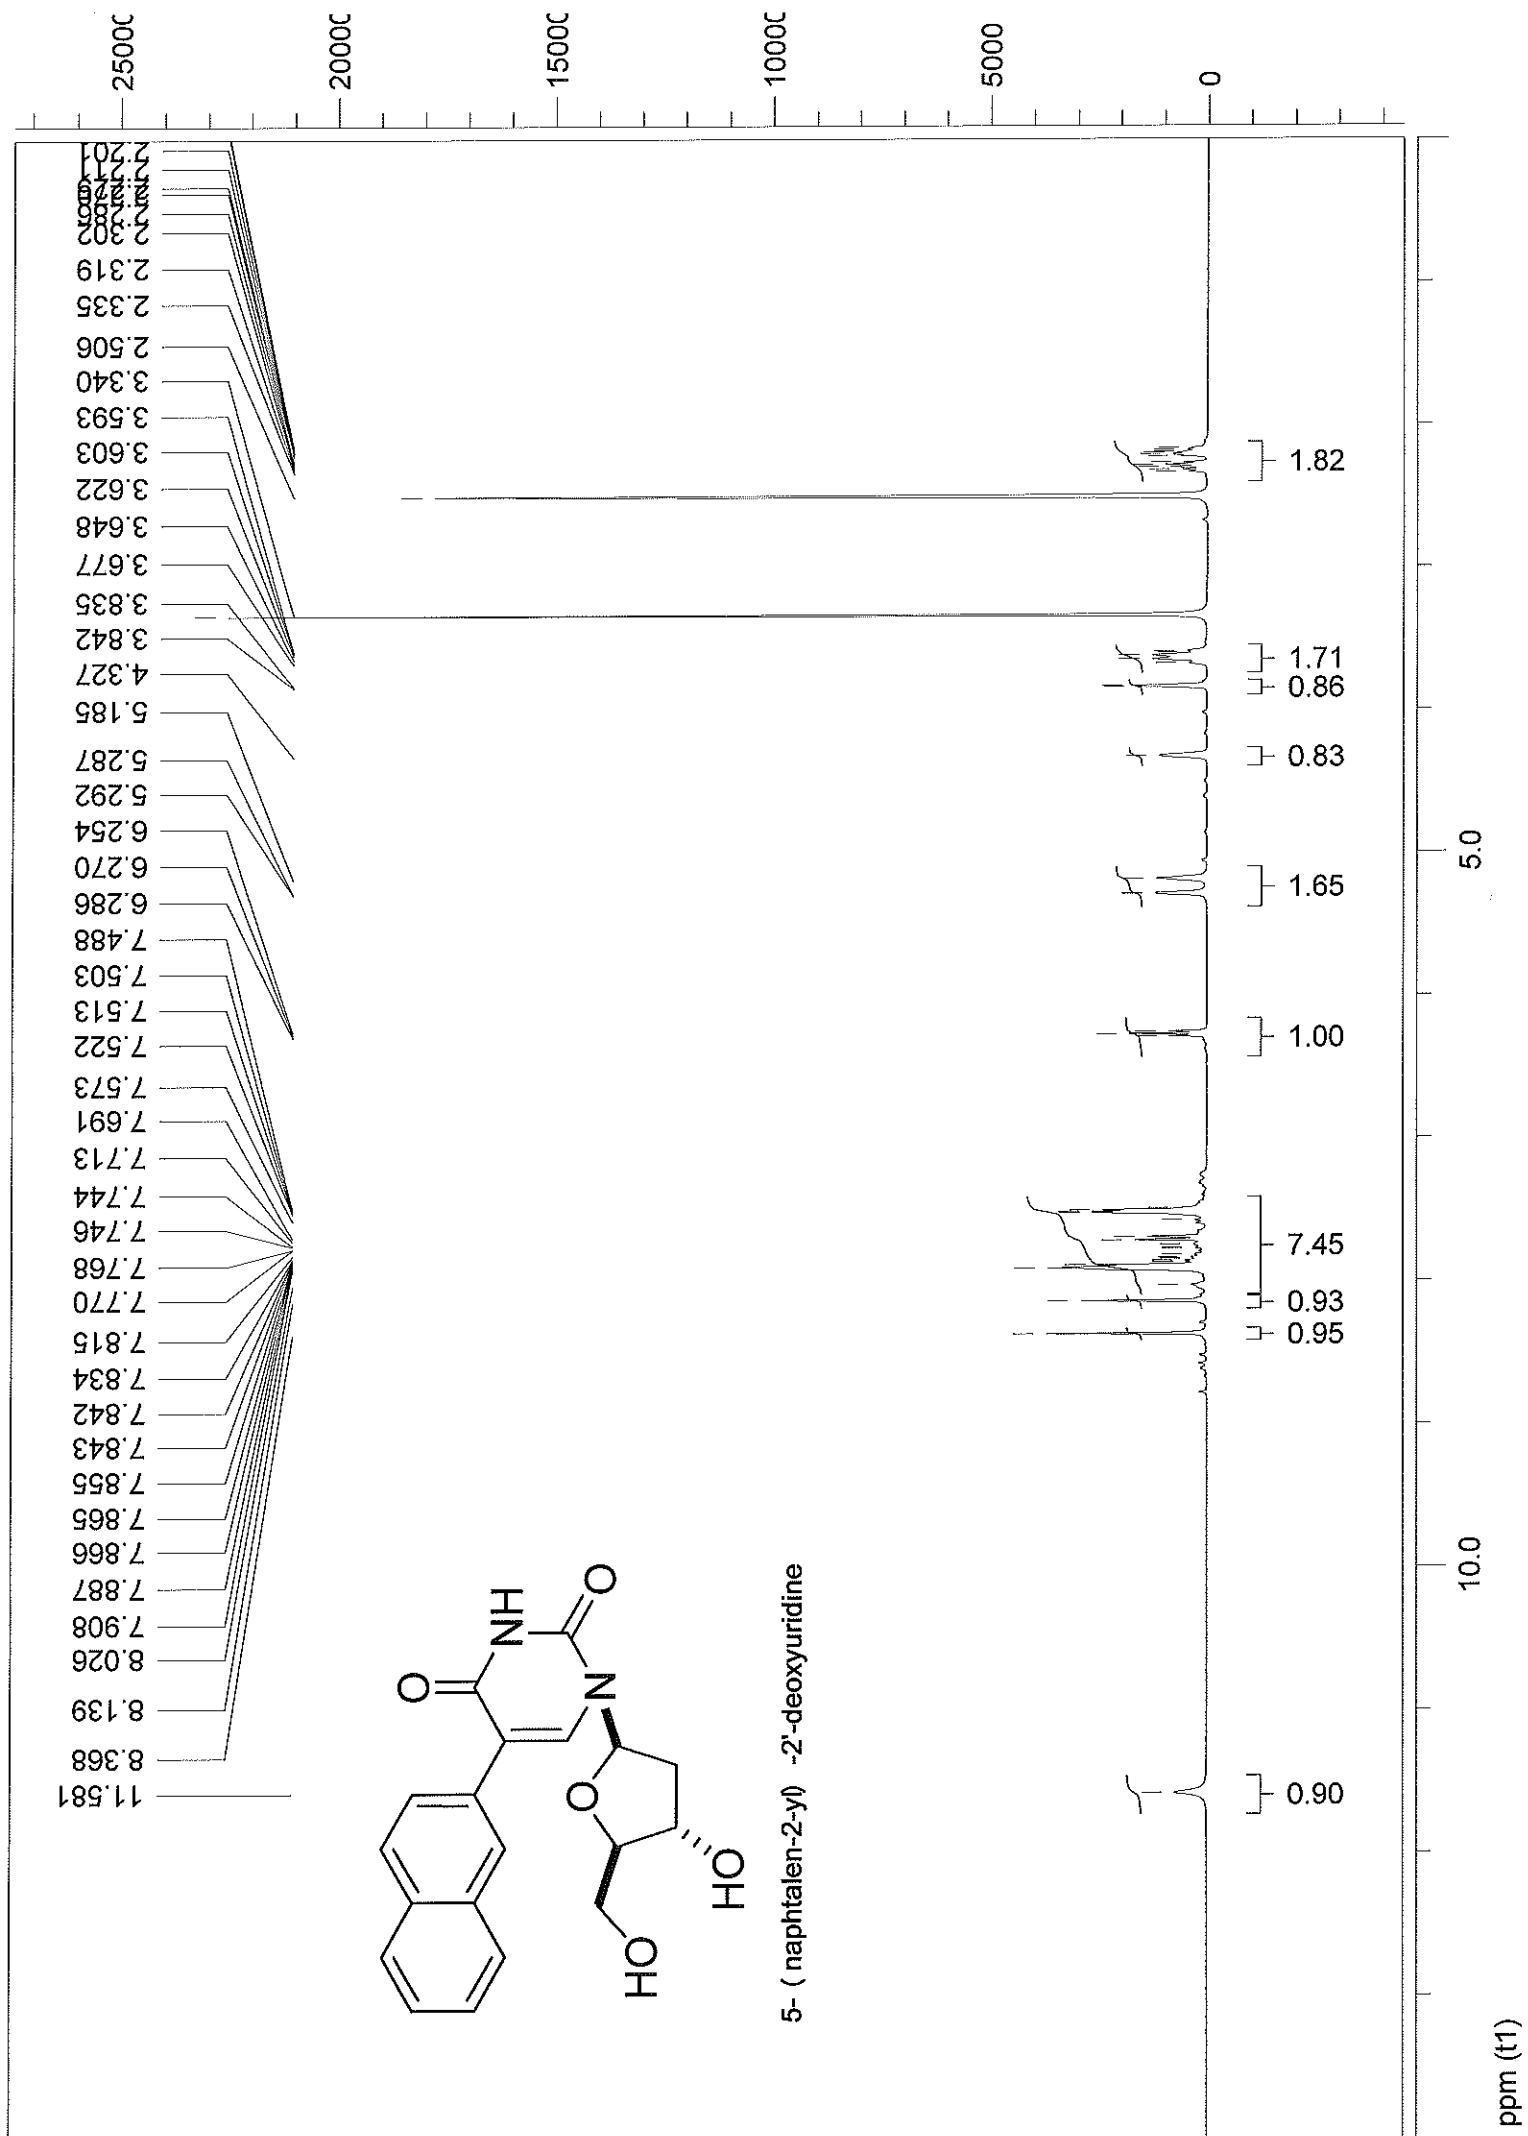

5-(2-naphthyl)-2'-deoxyuridine

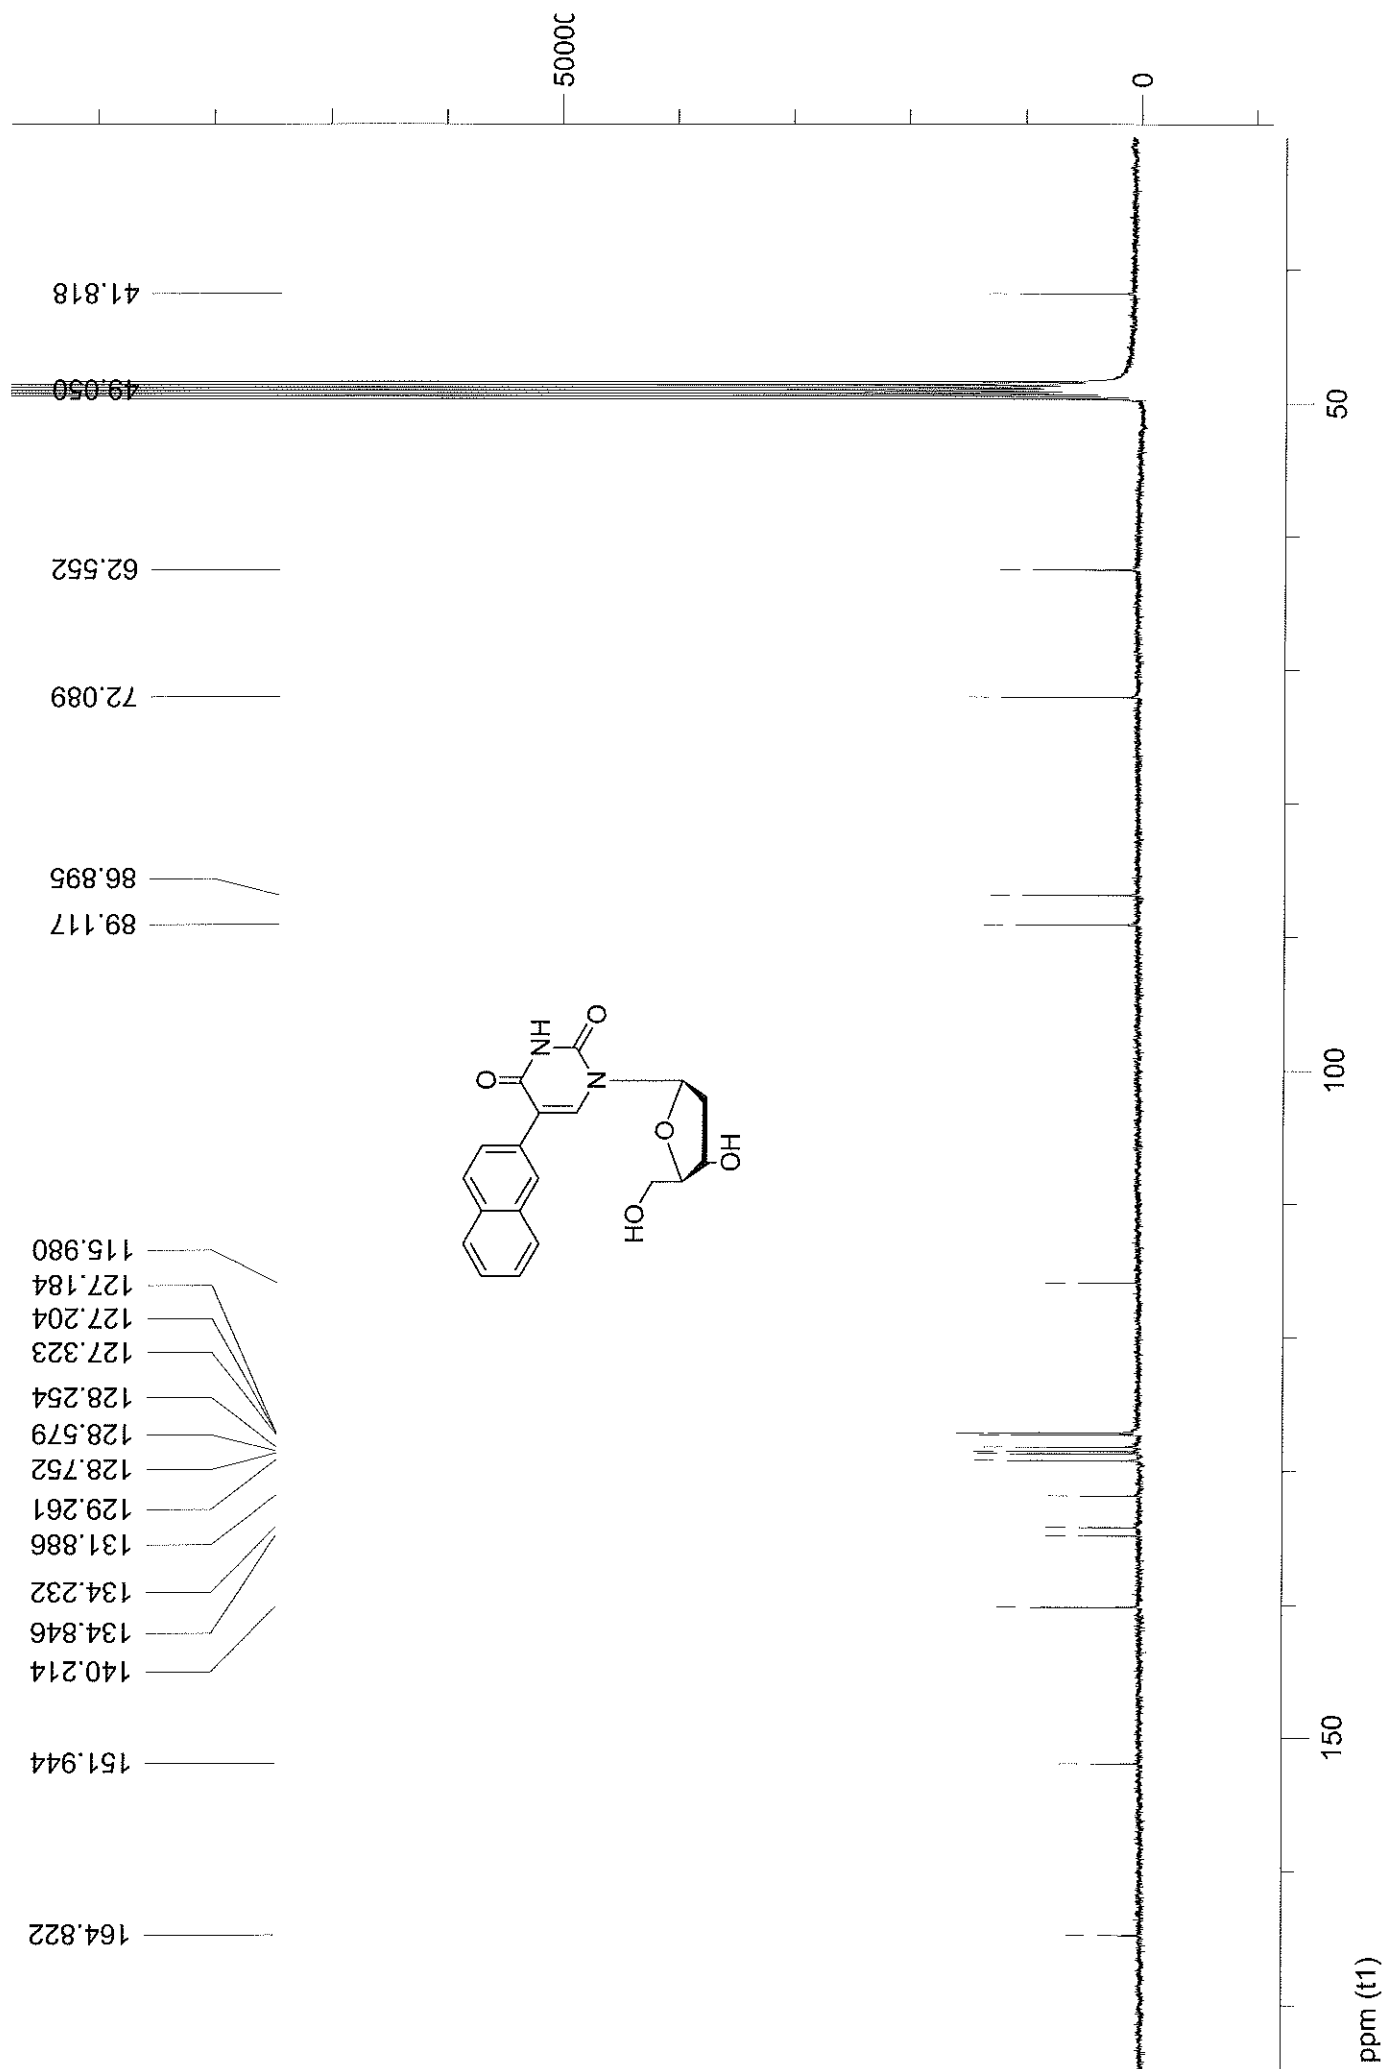

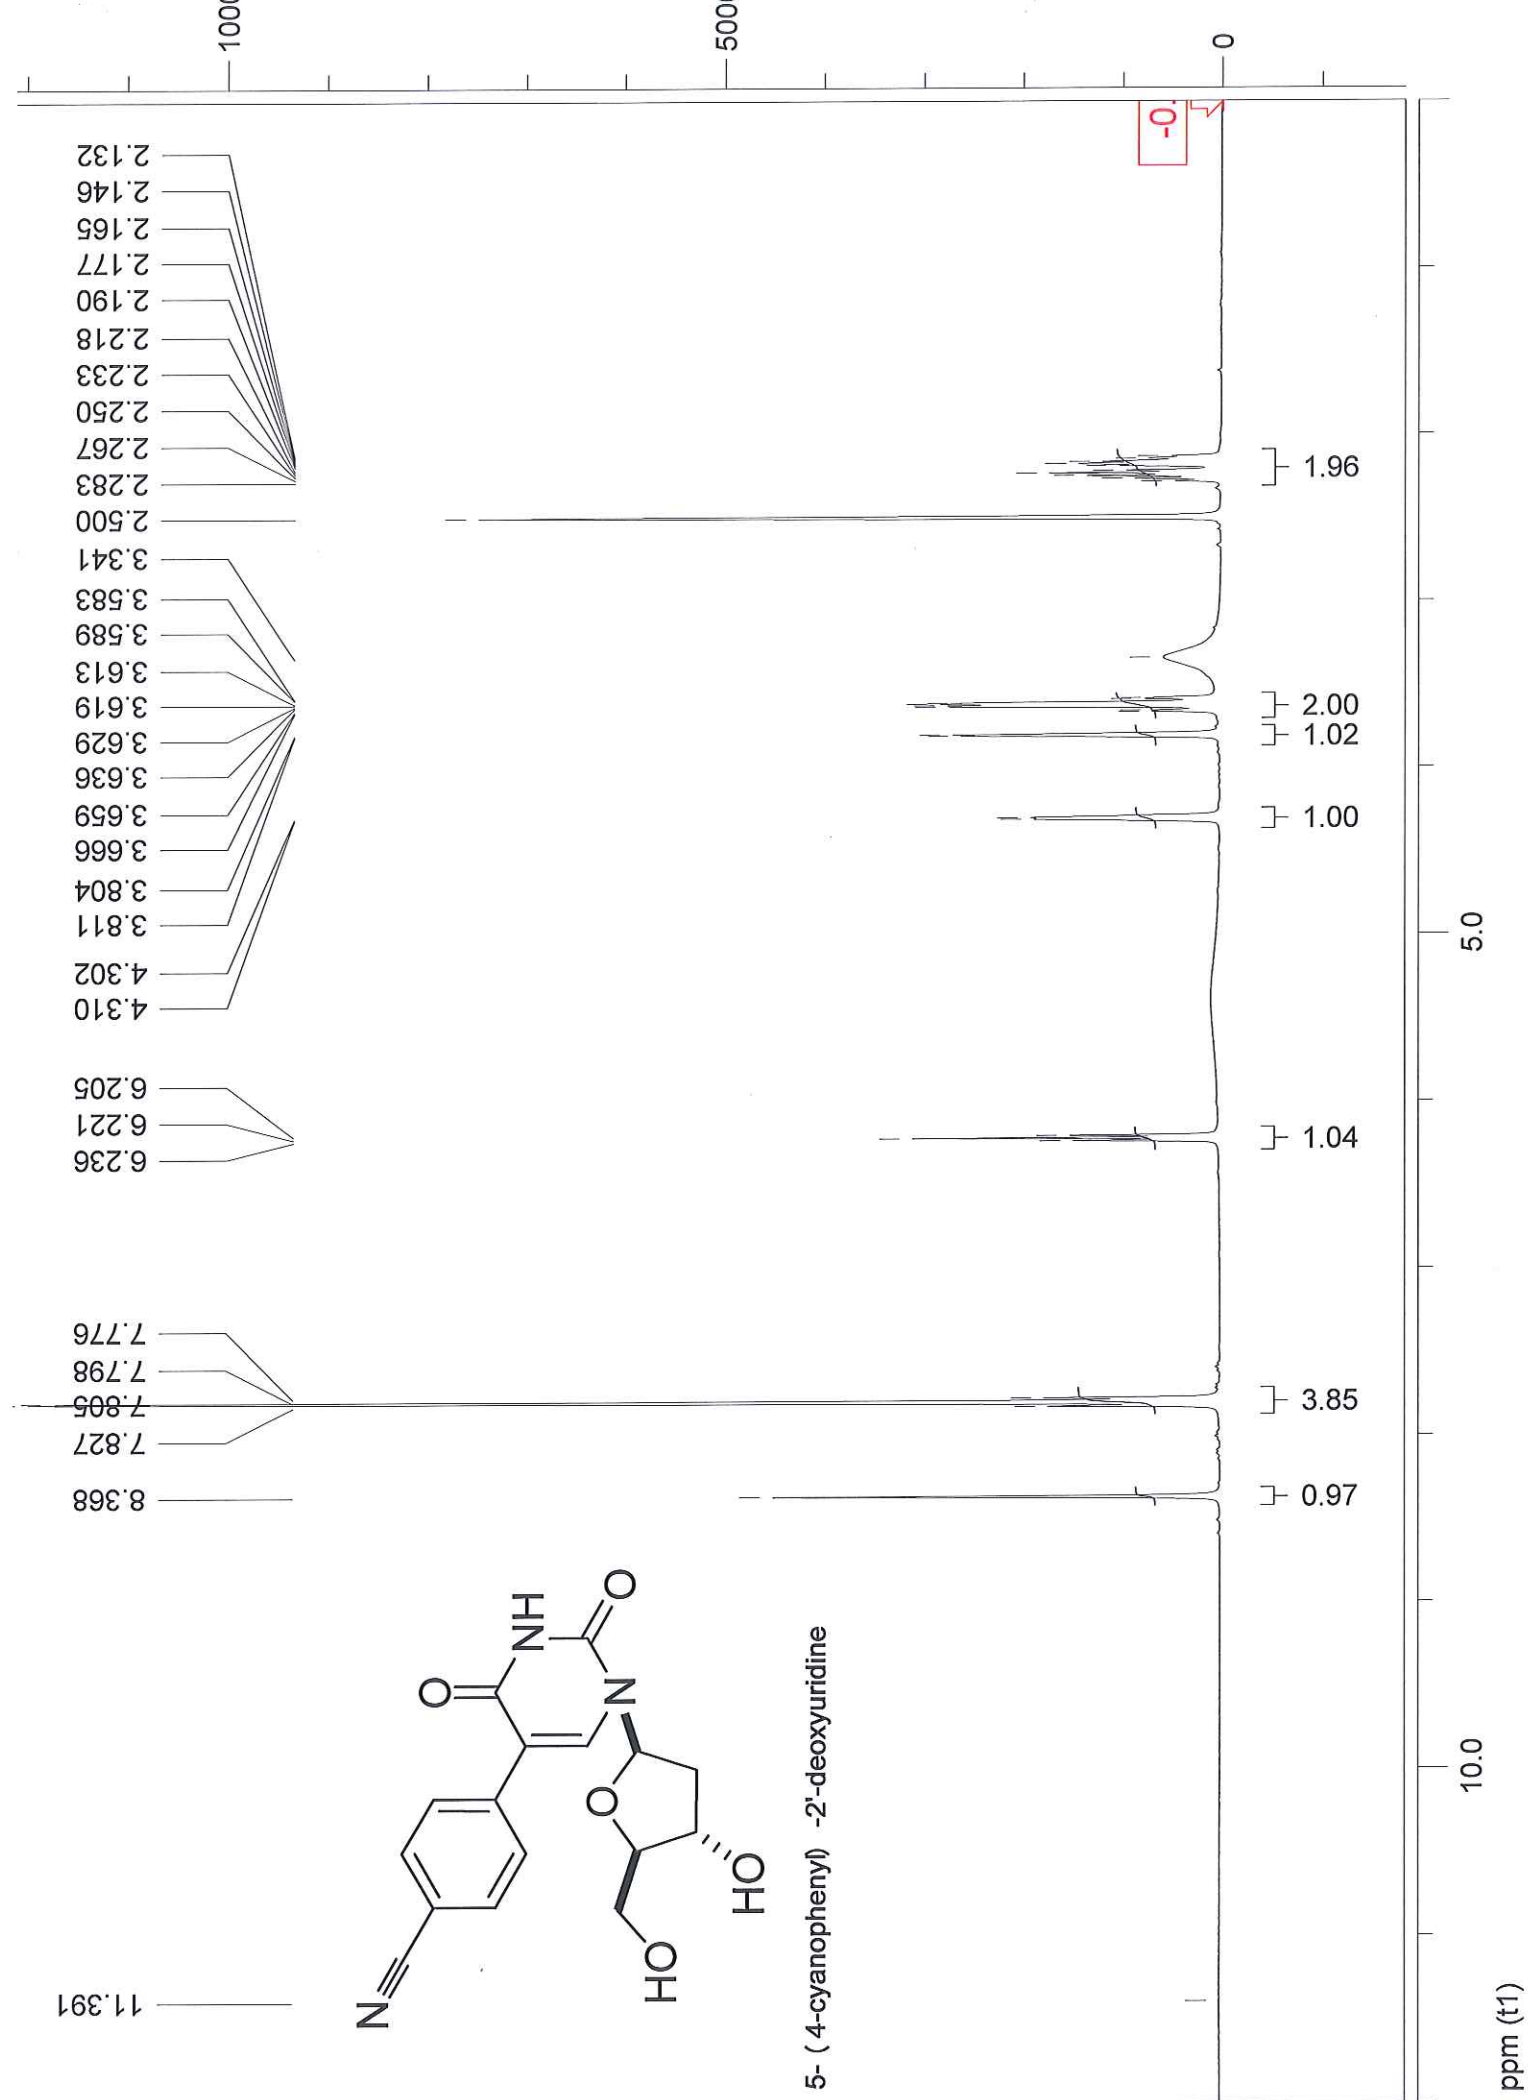

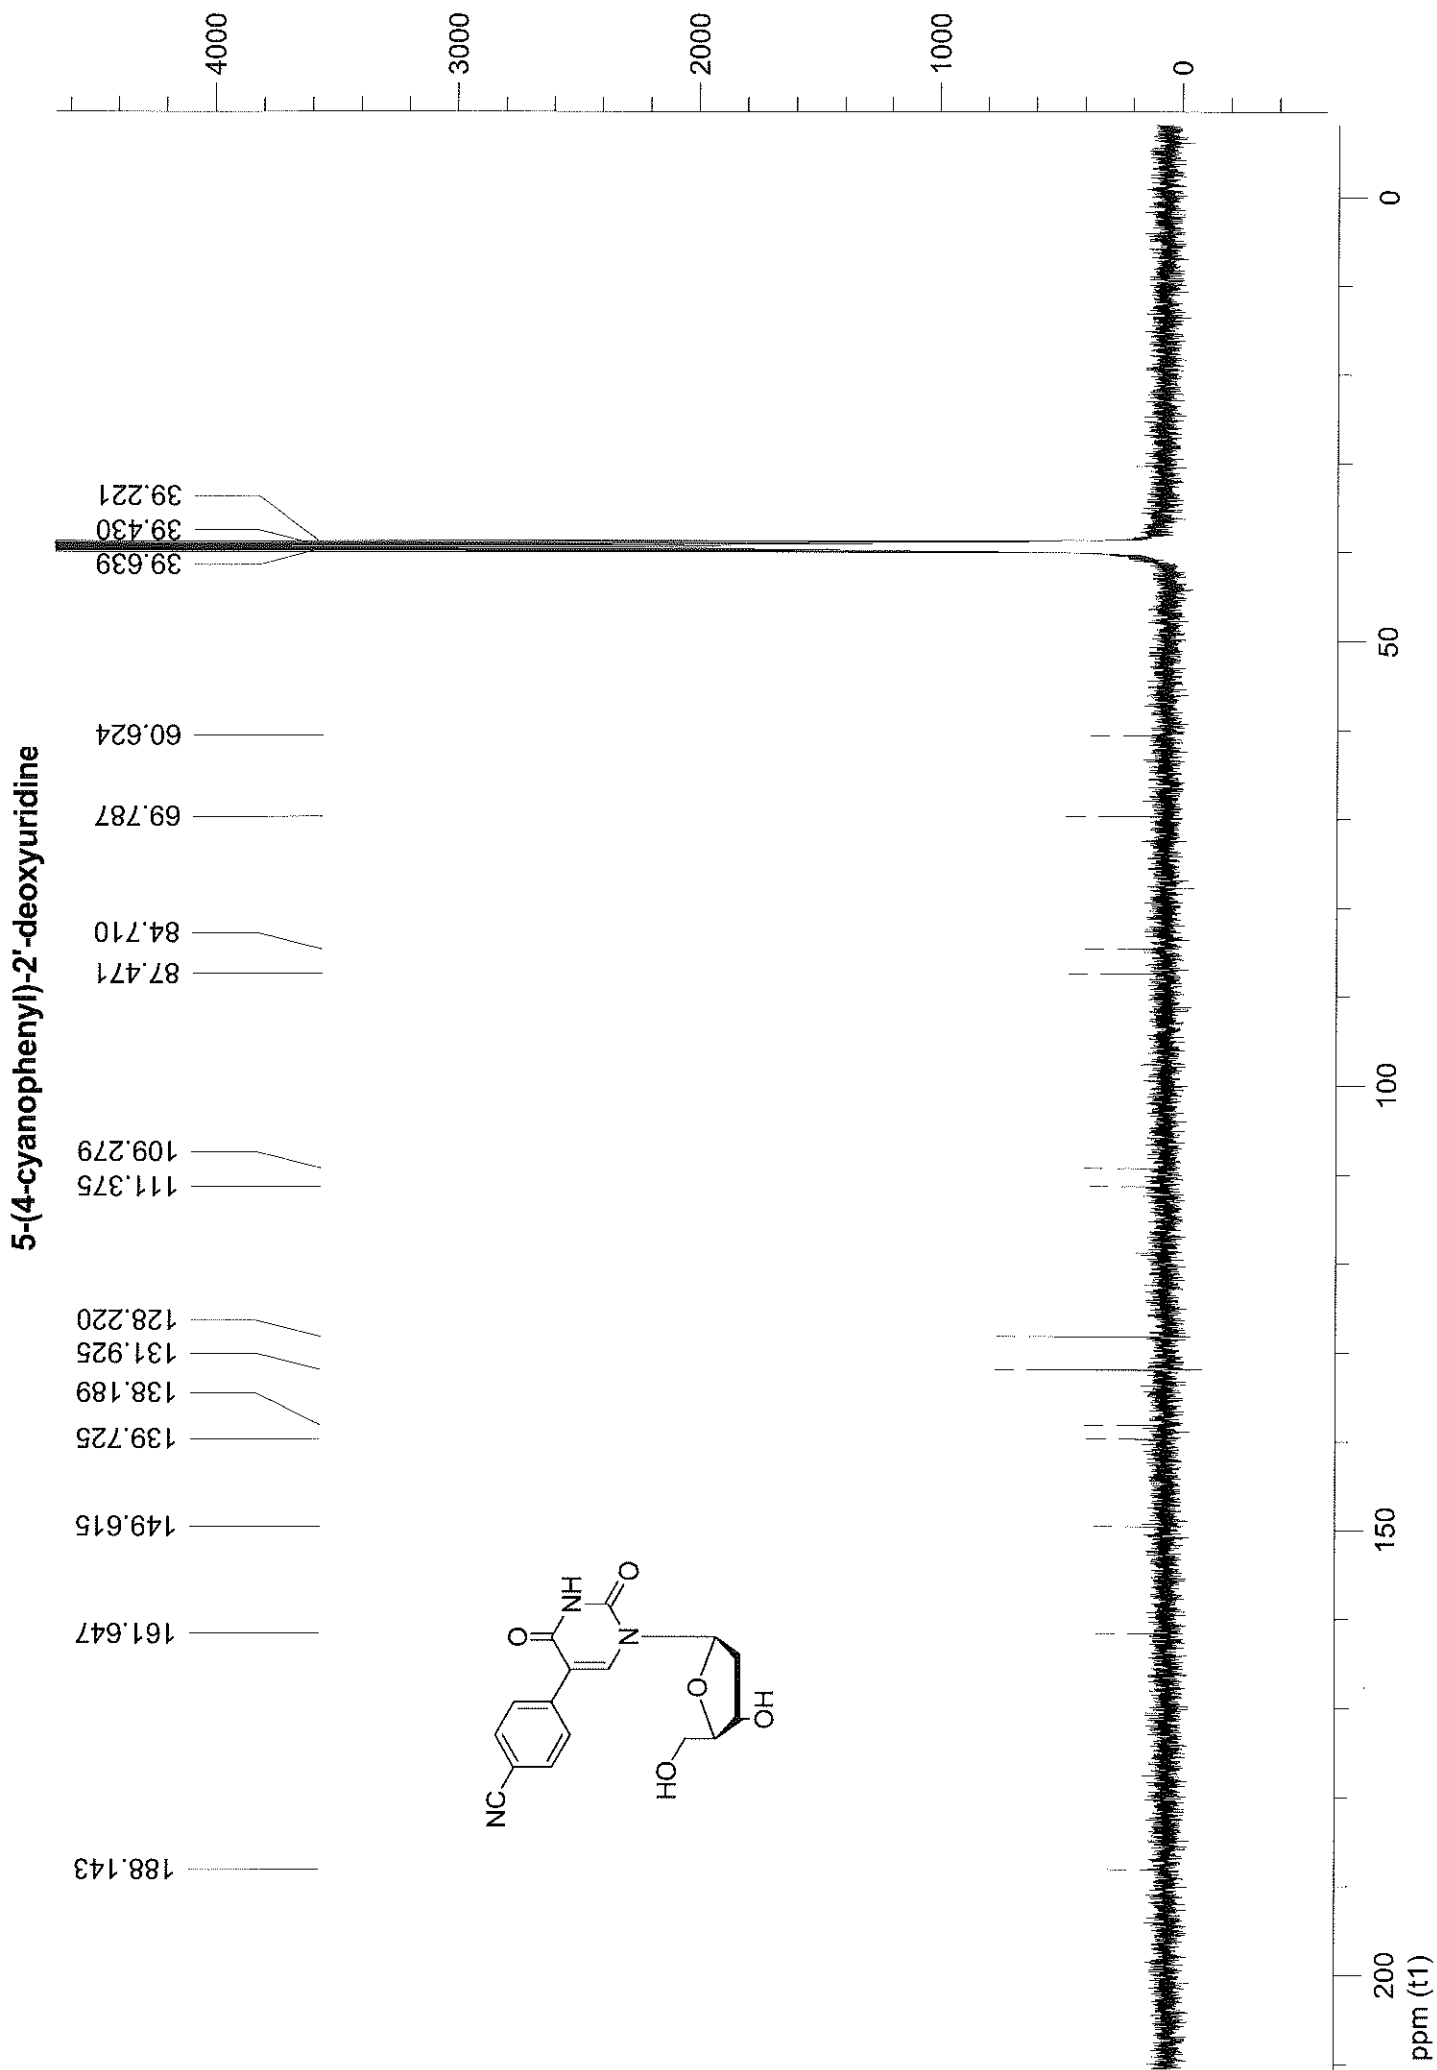





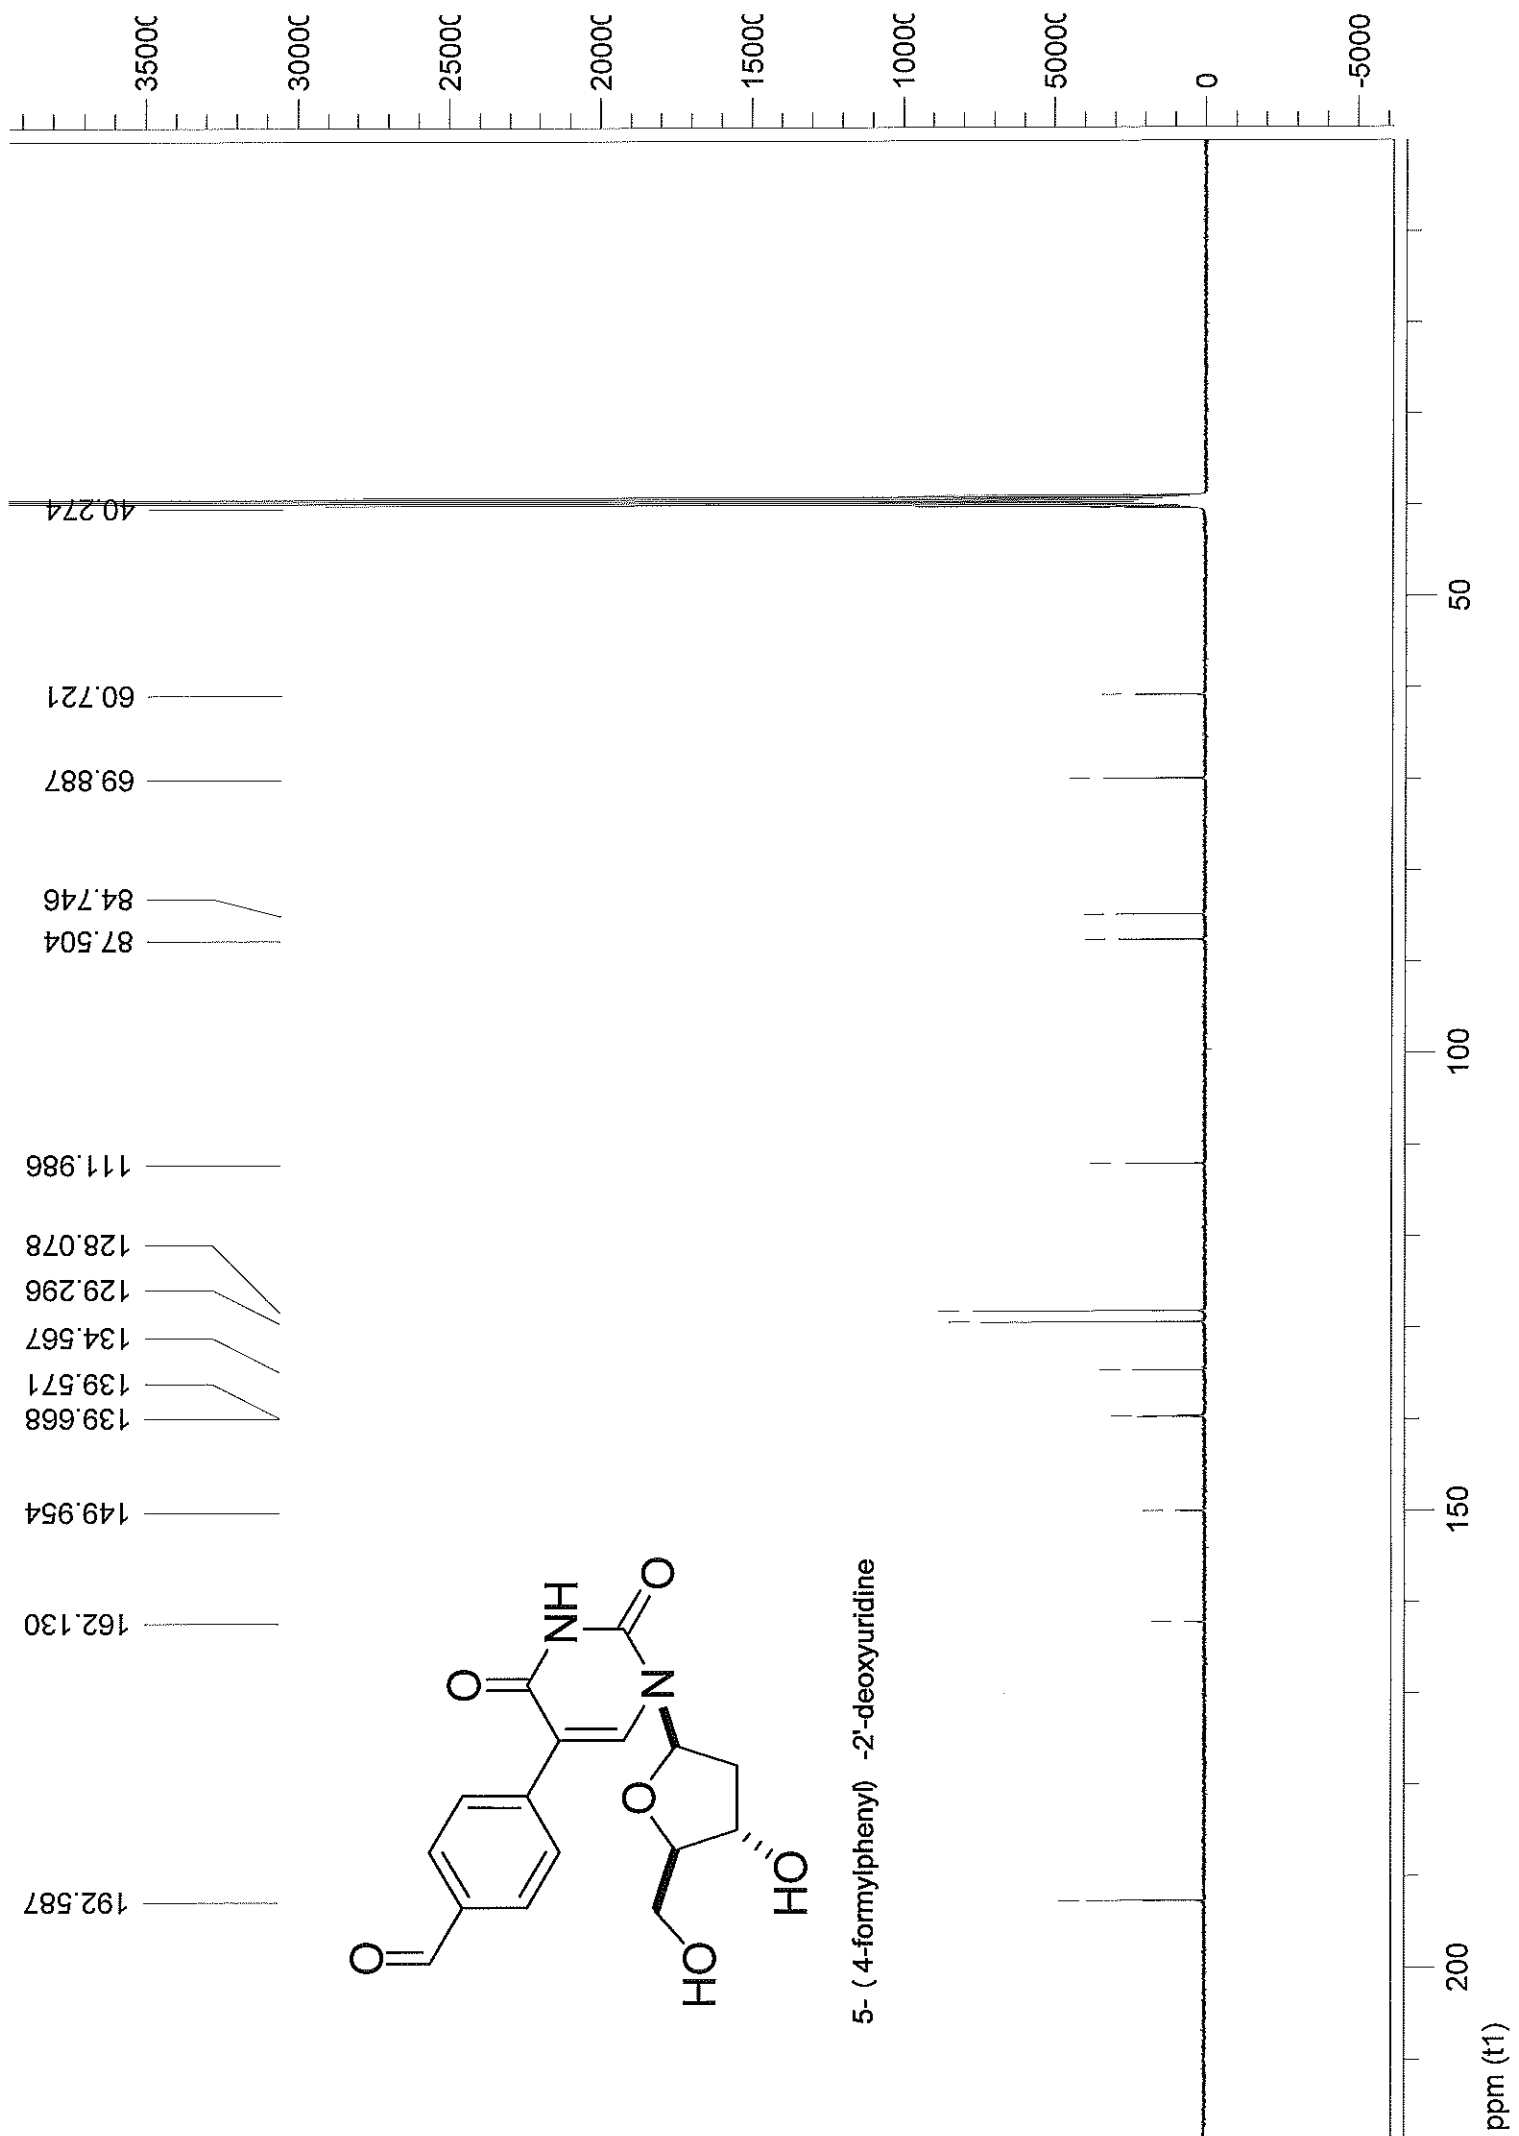

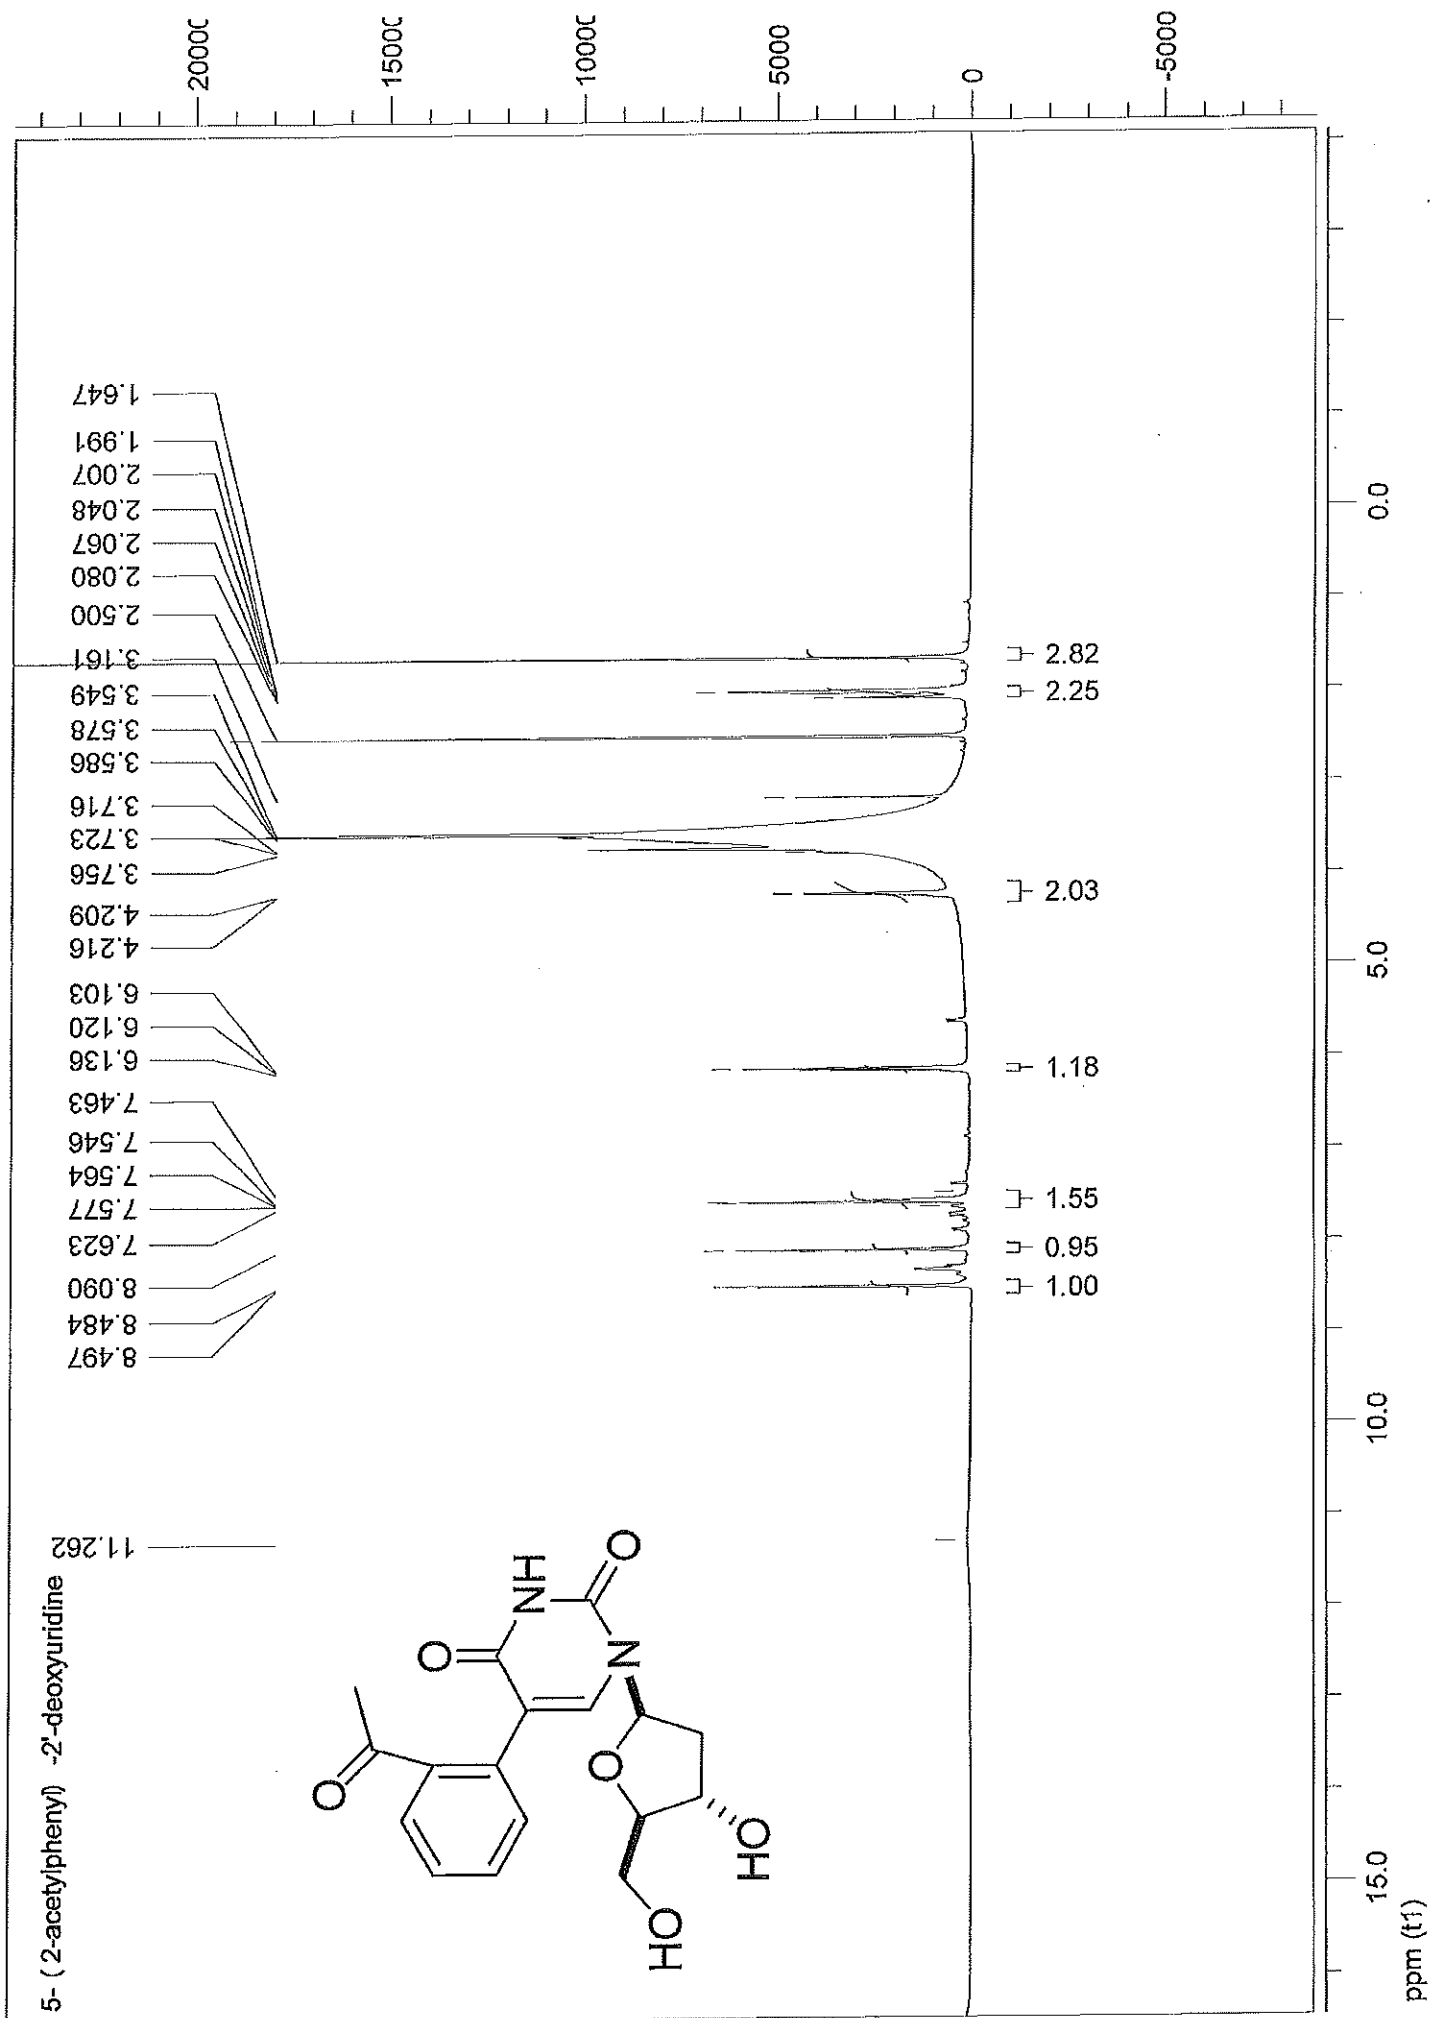

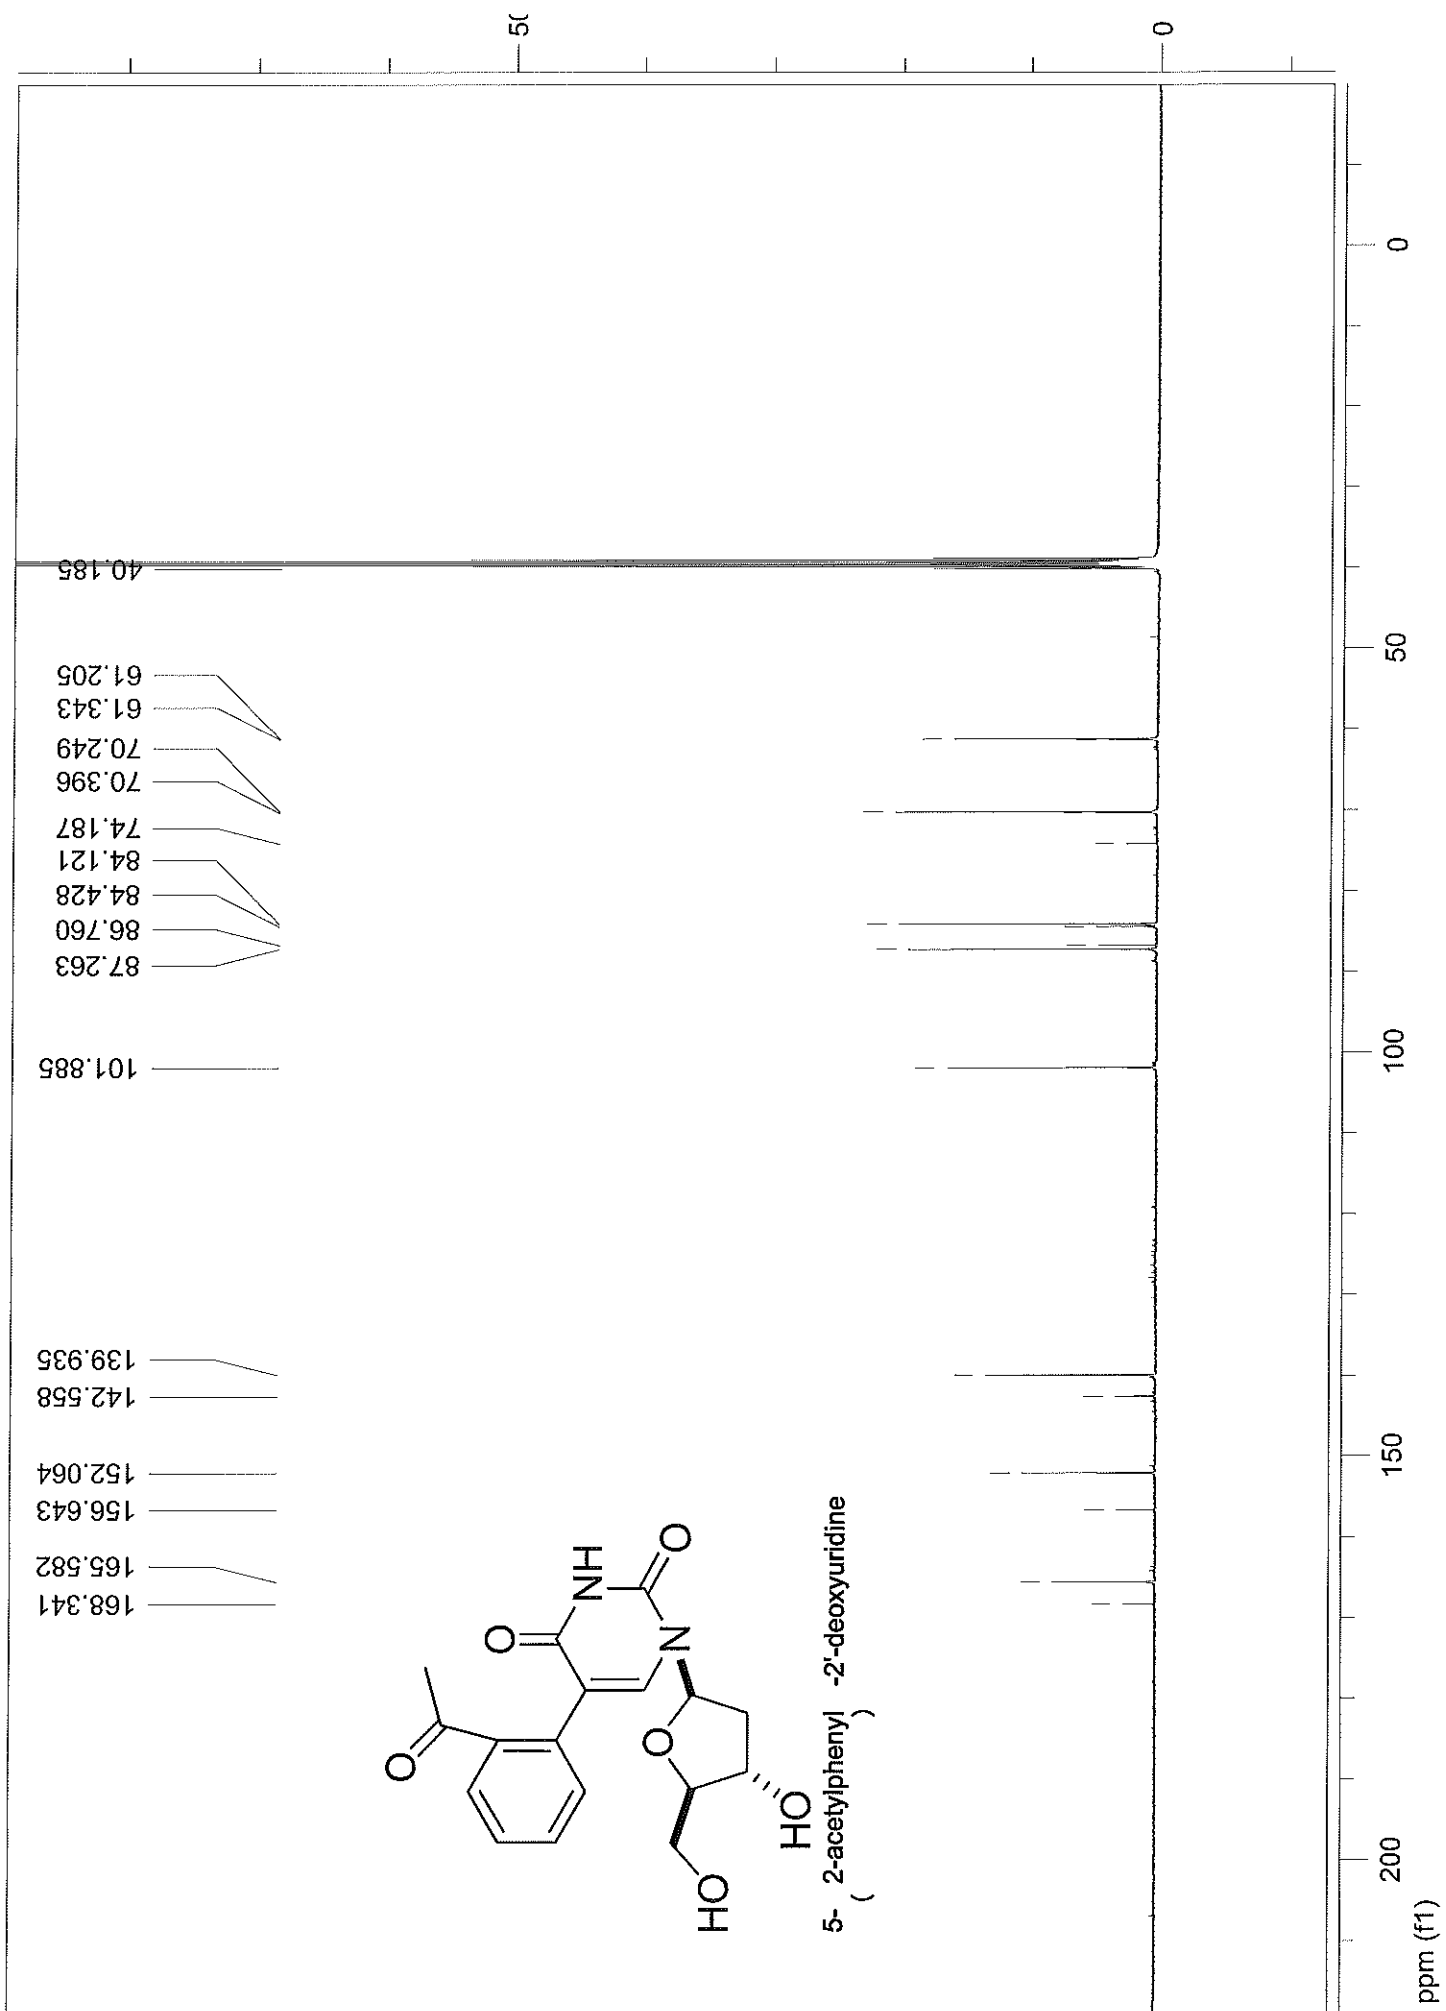

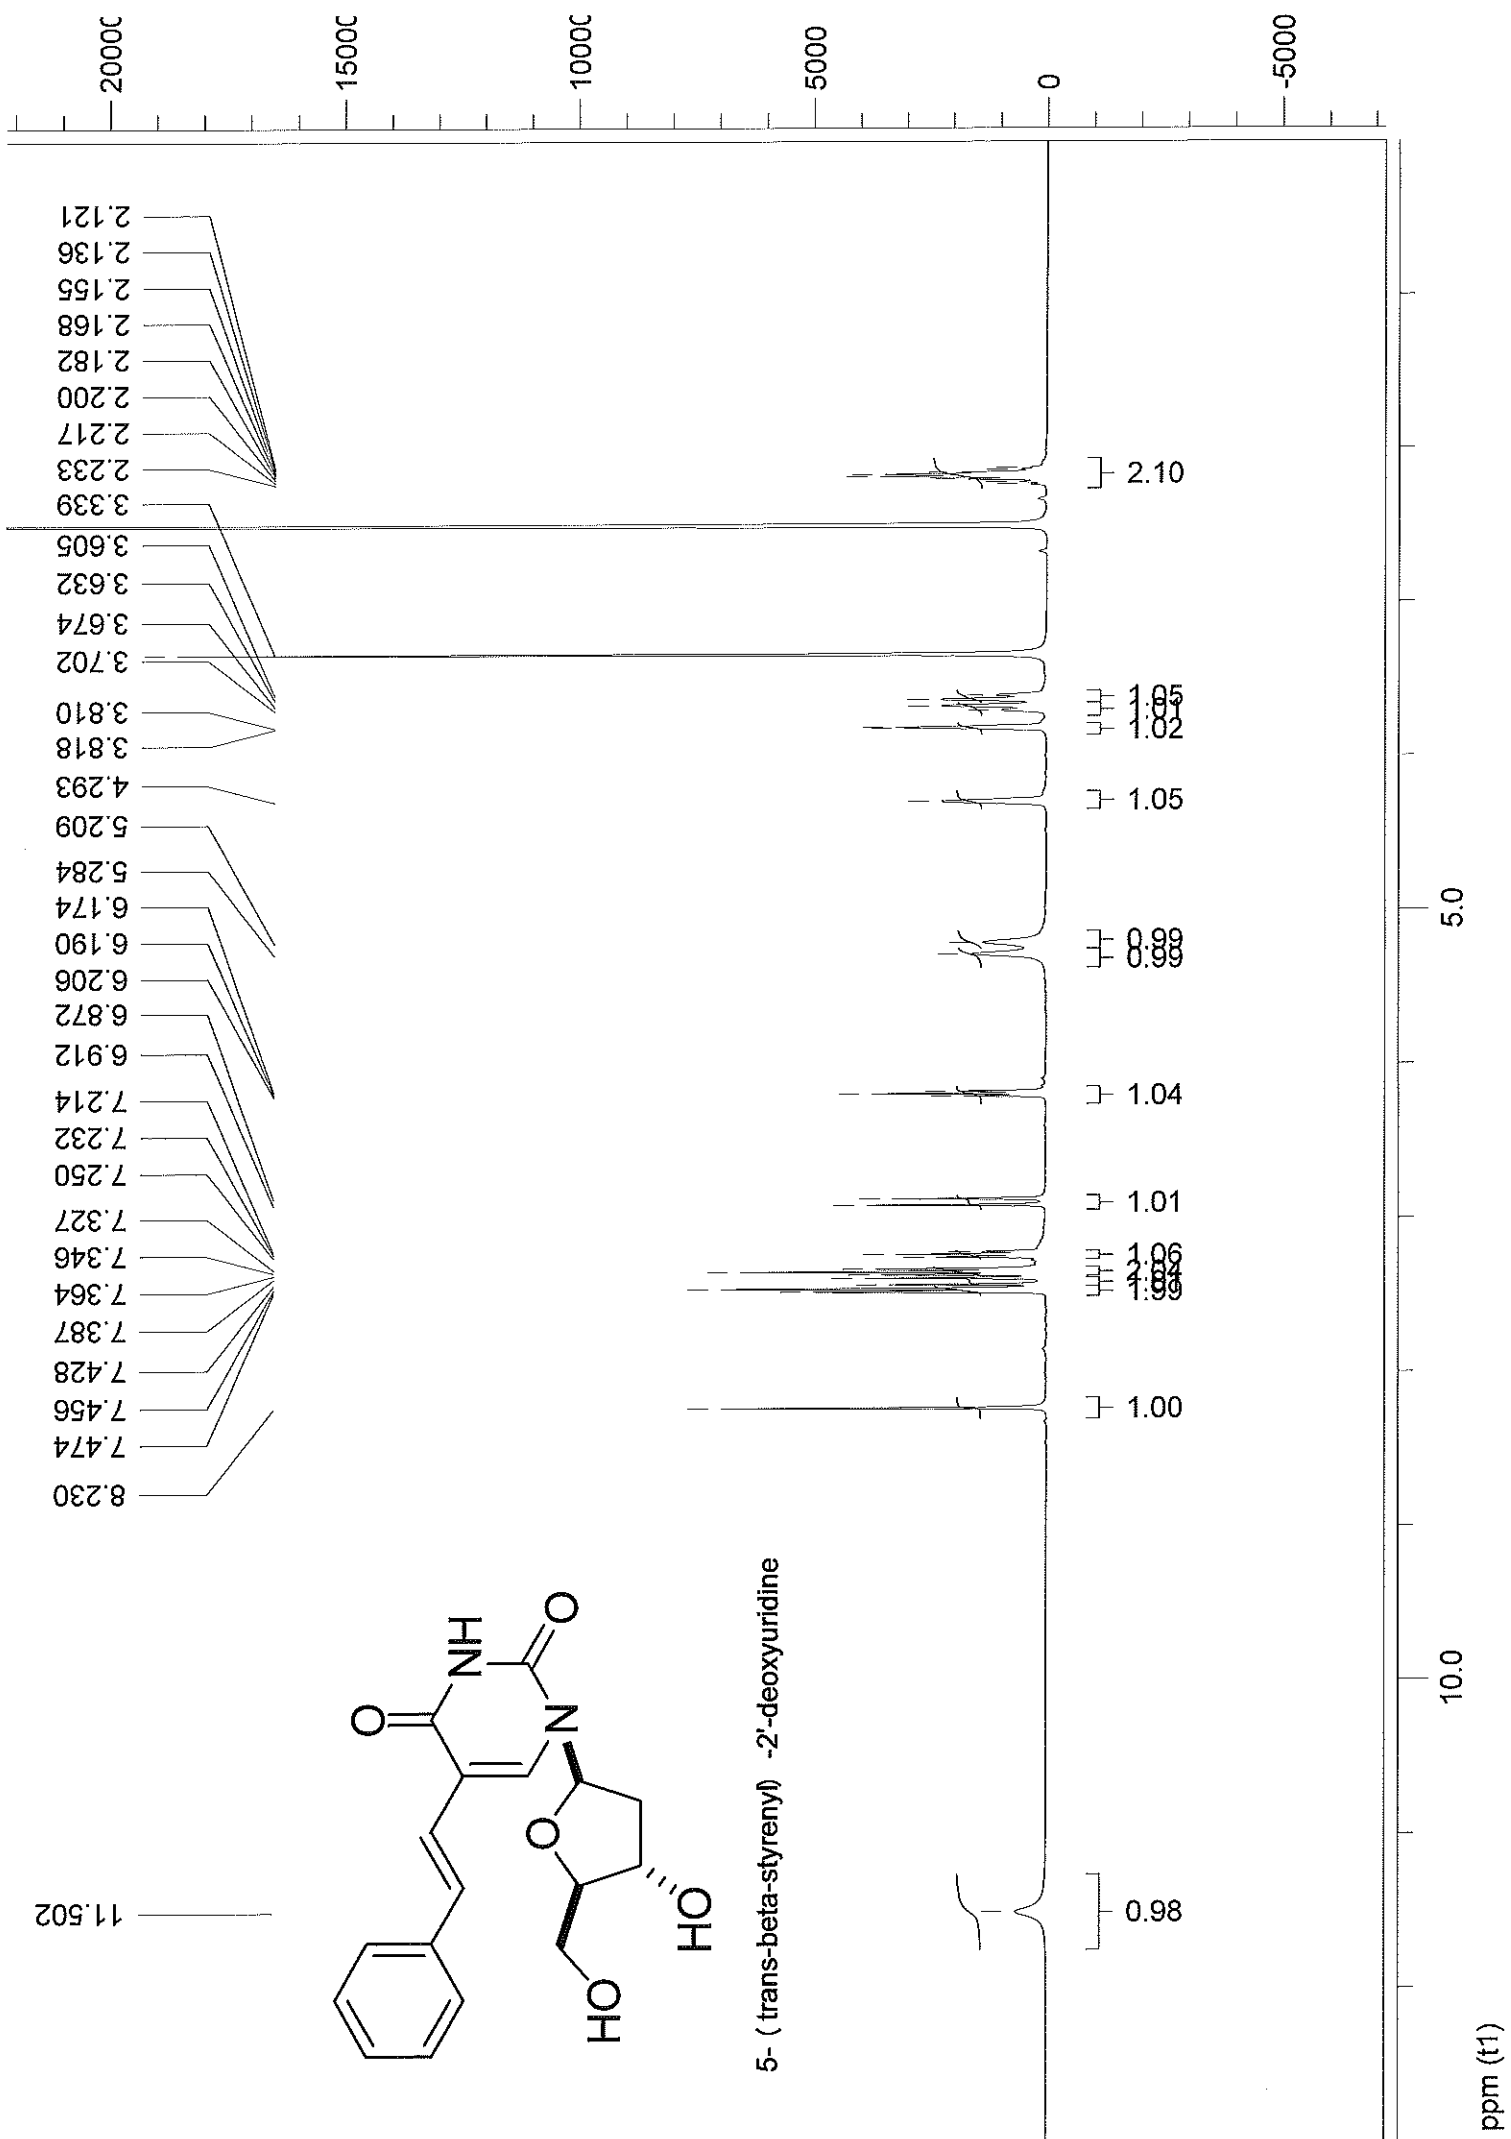

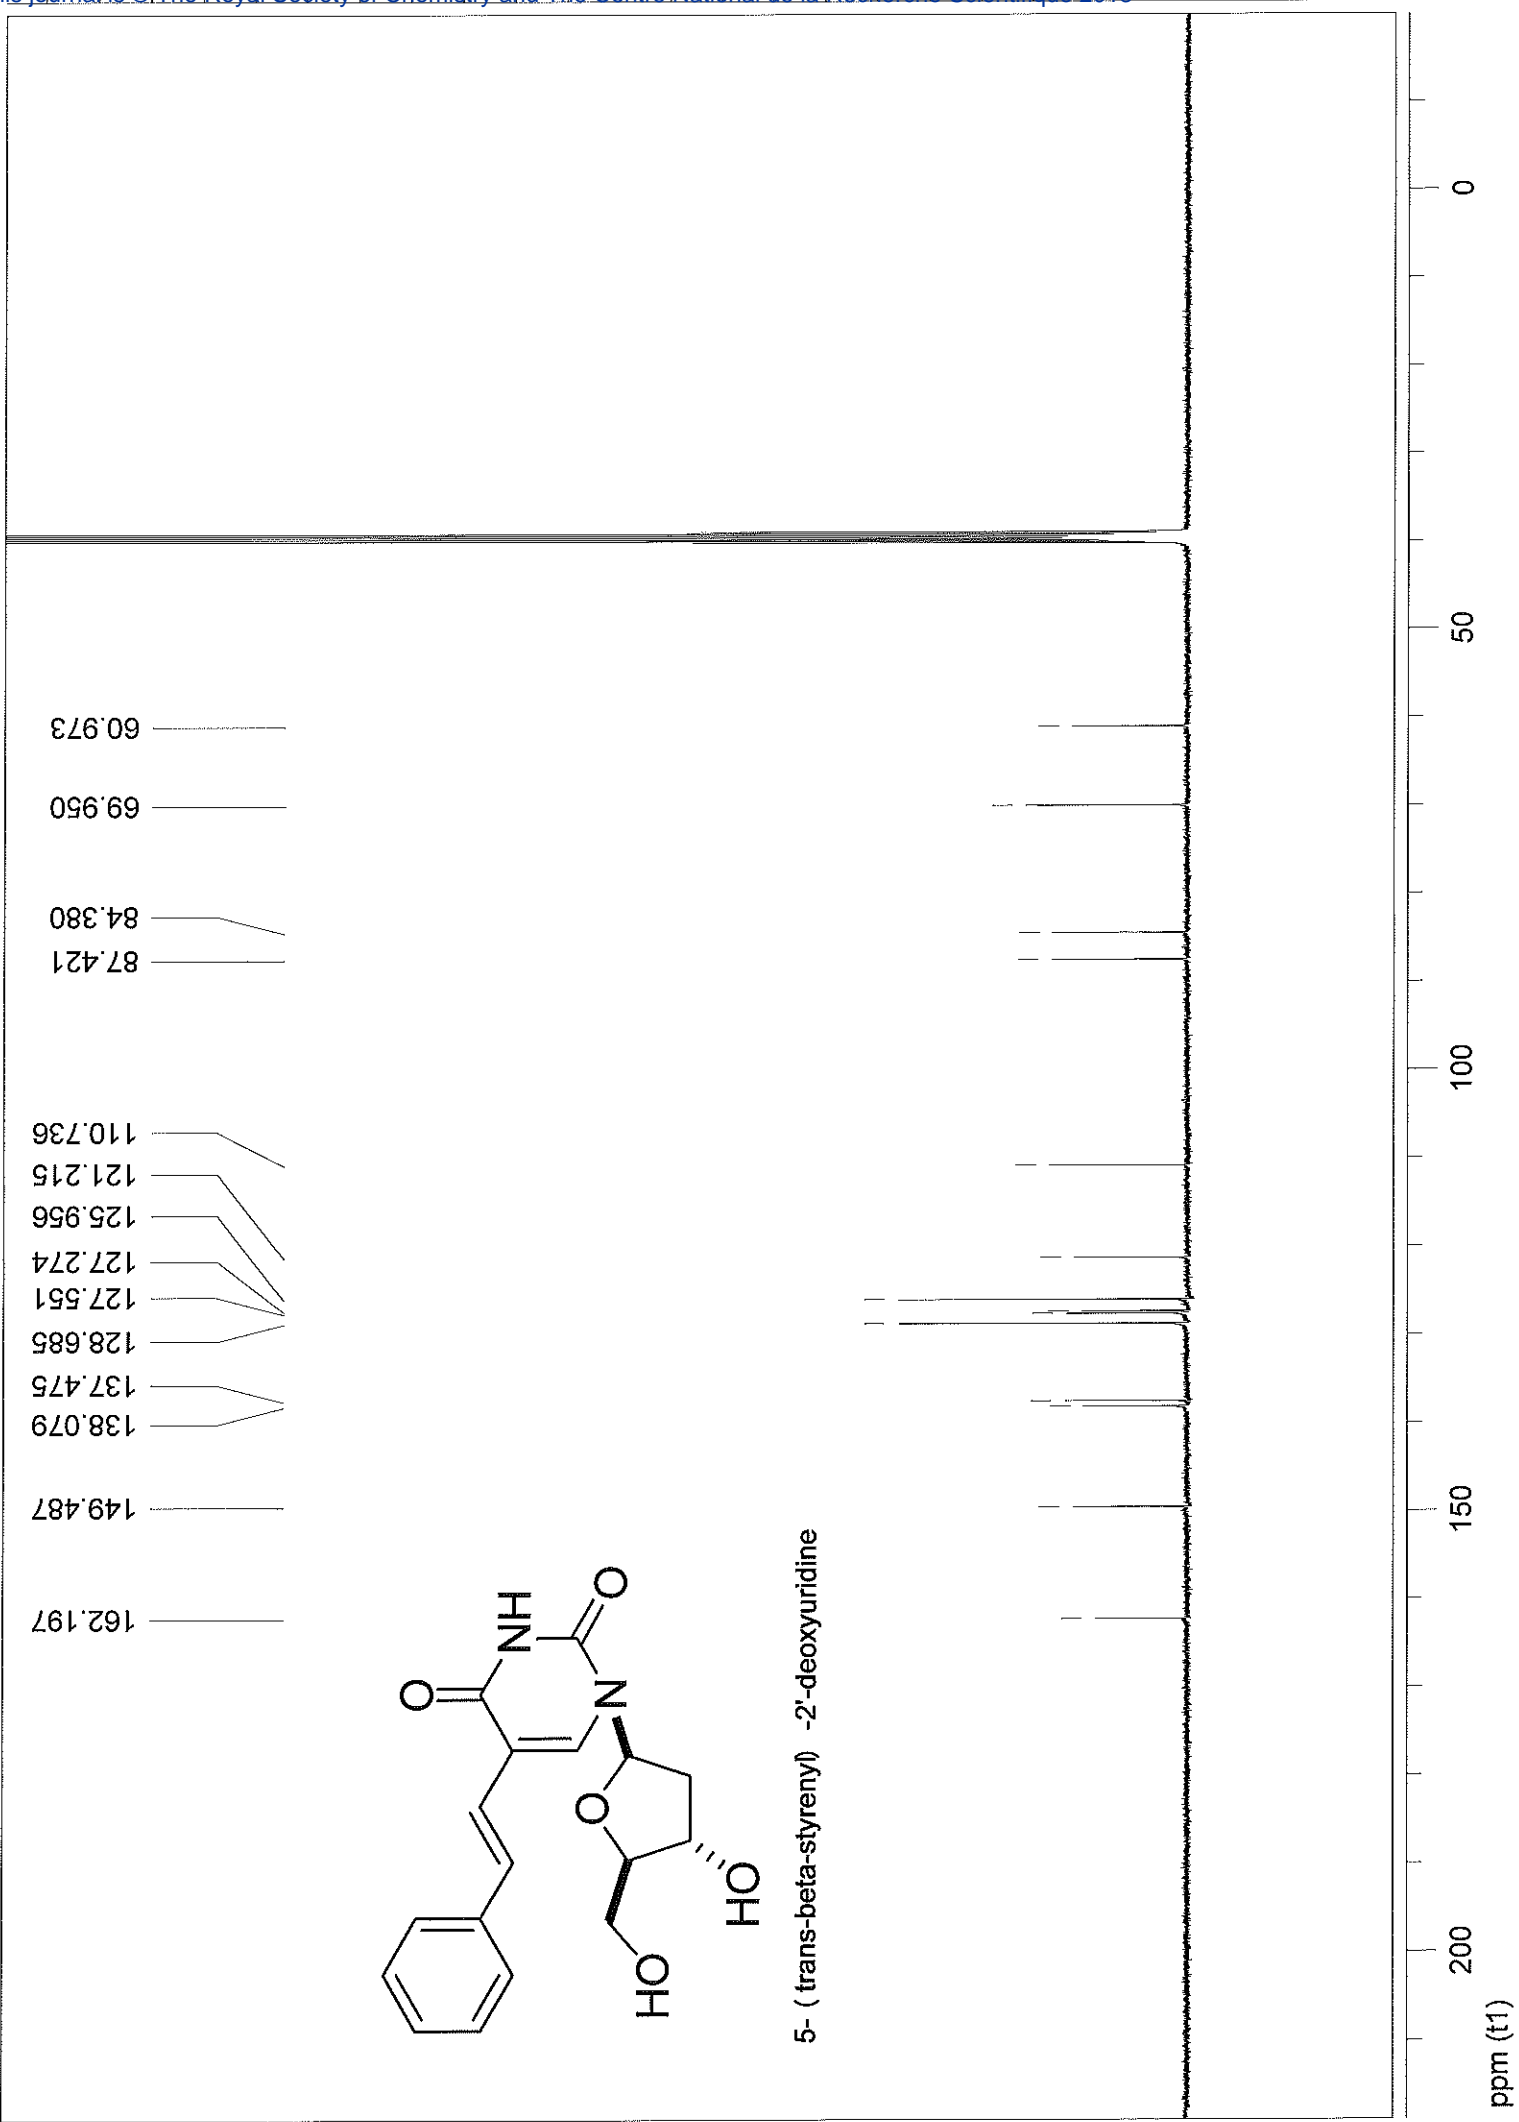

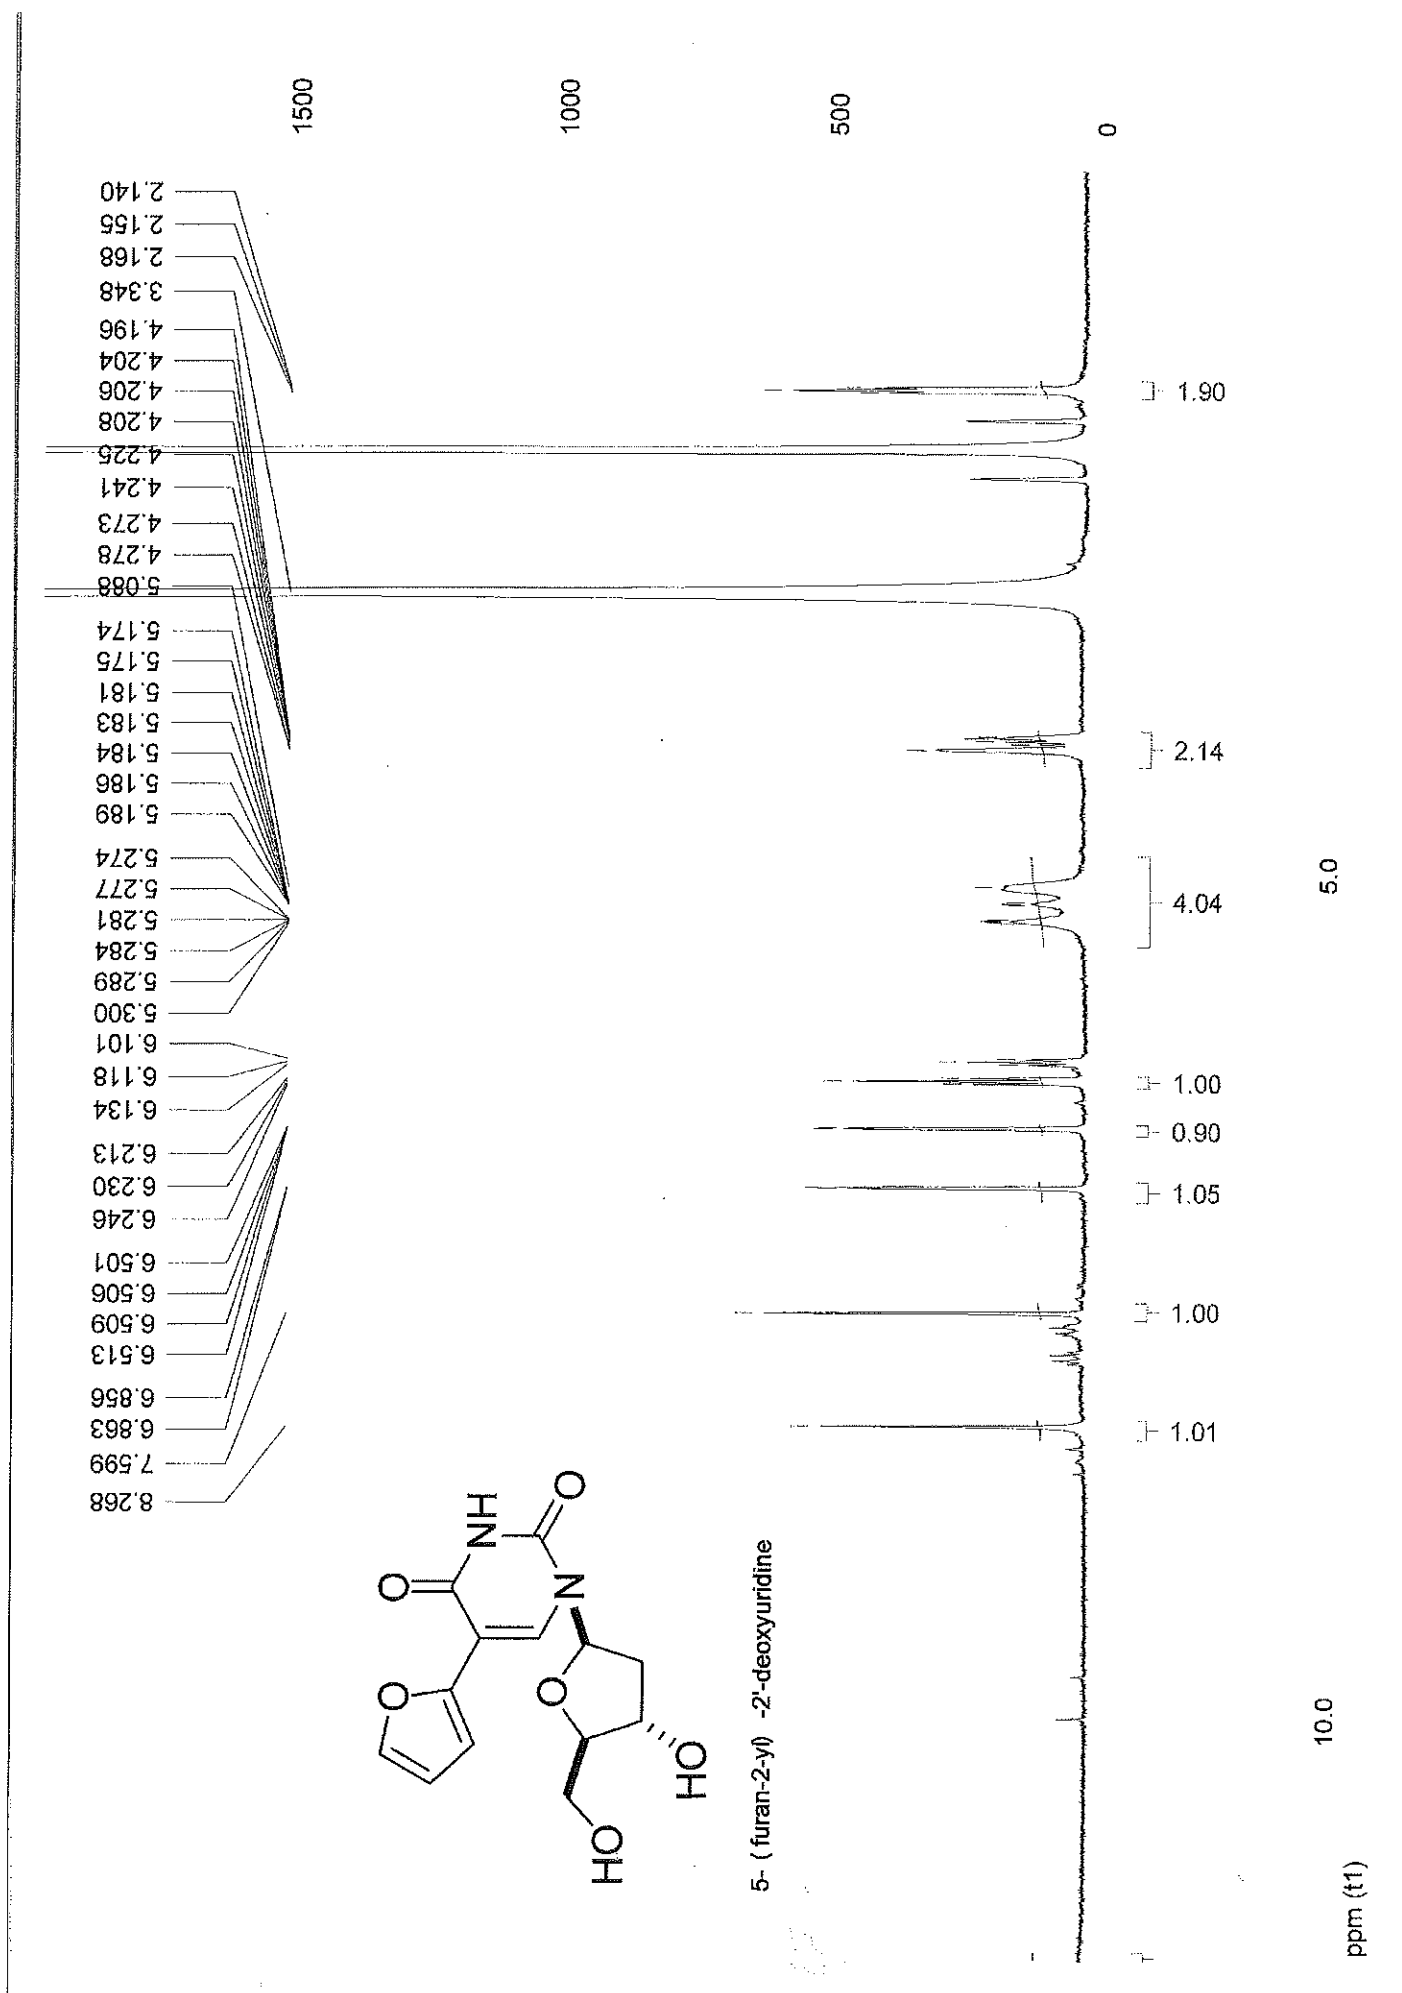

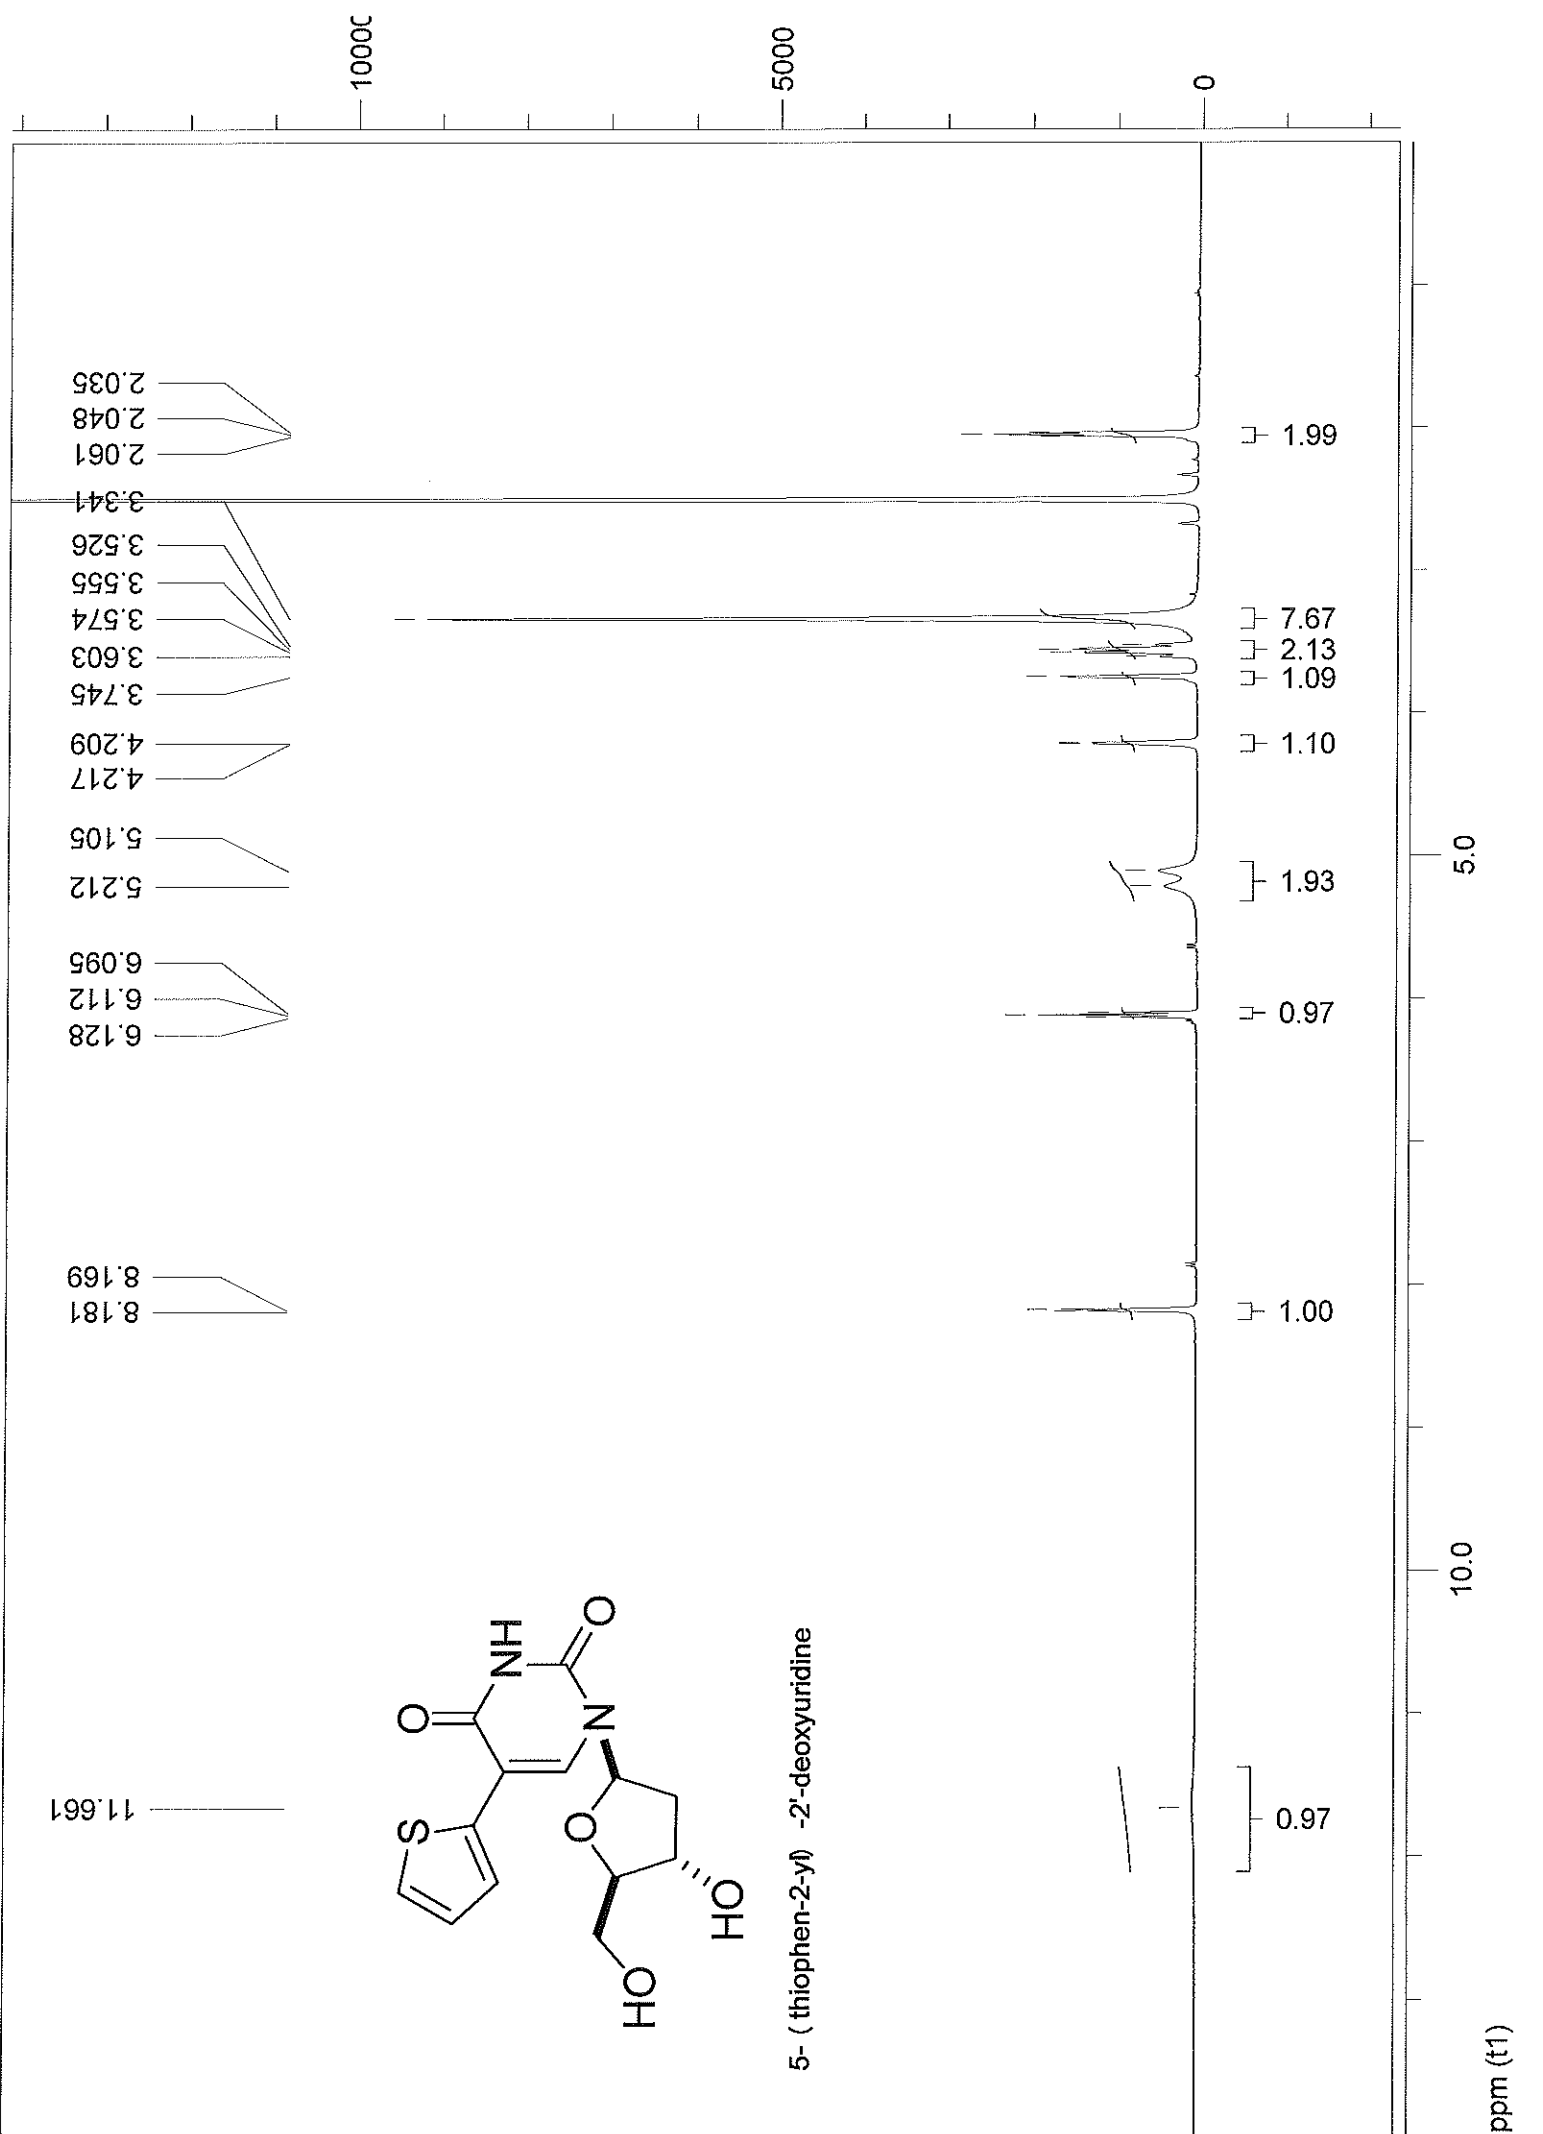



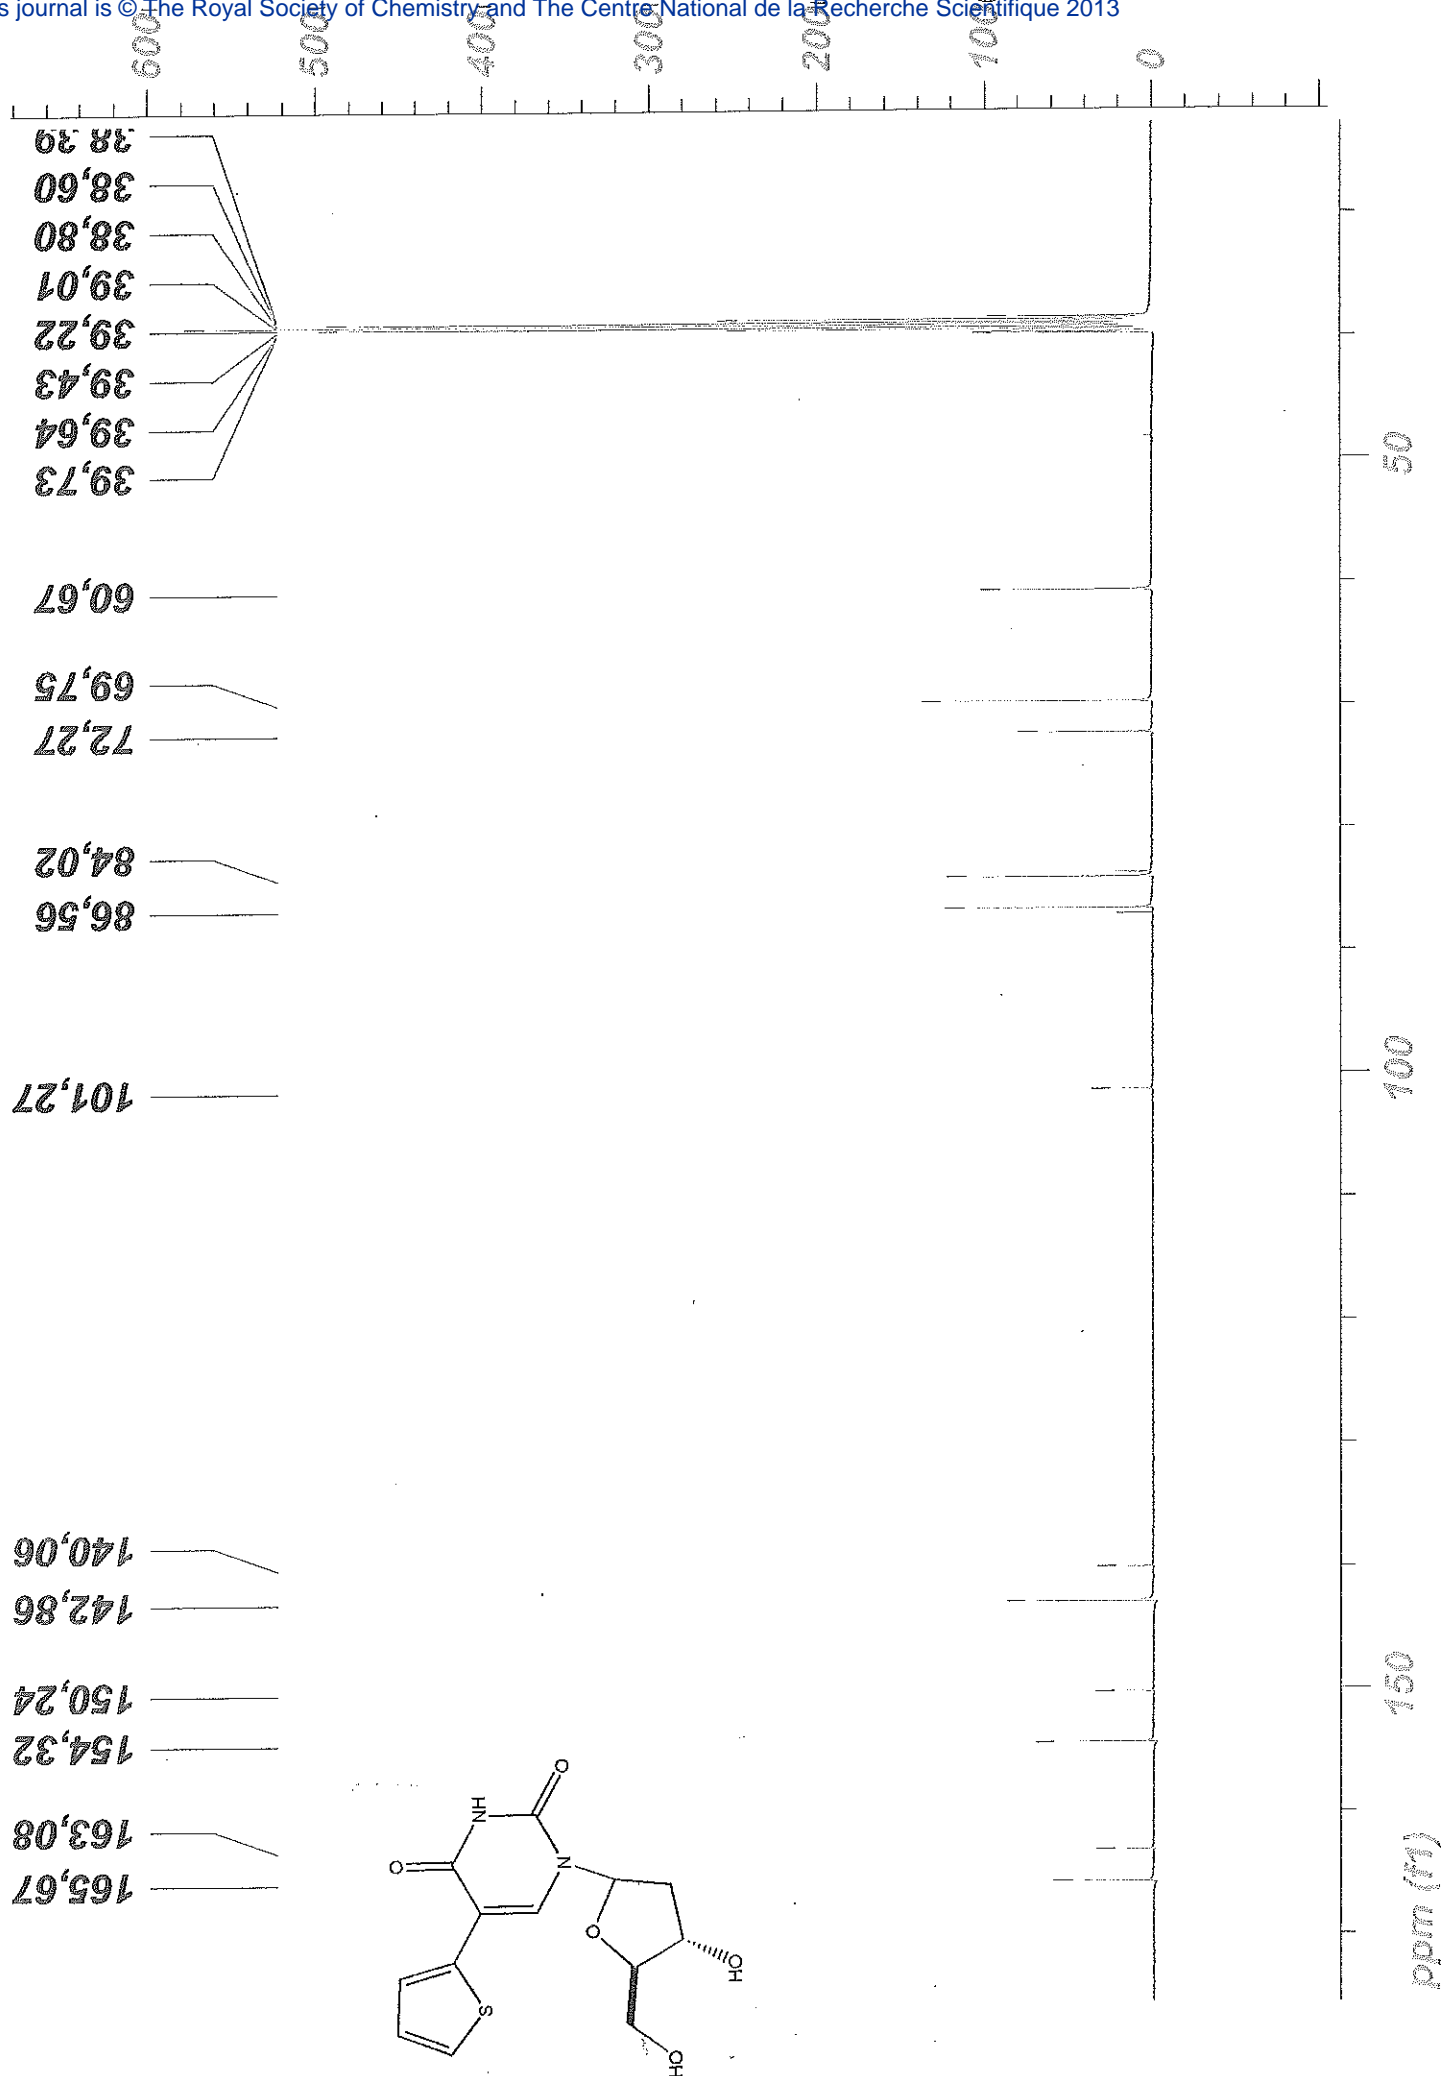

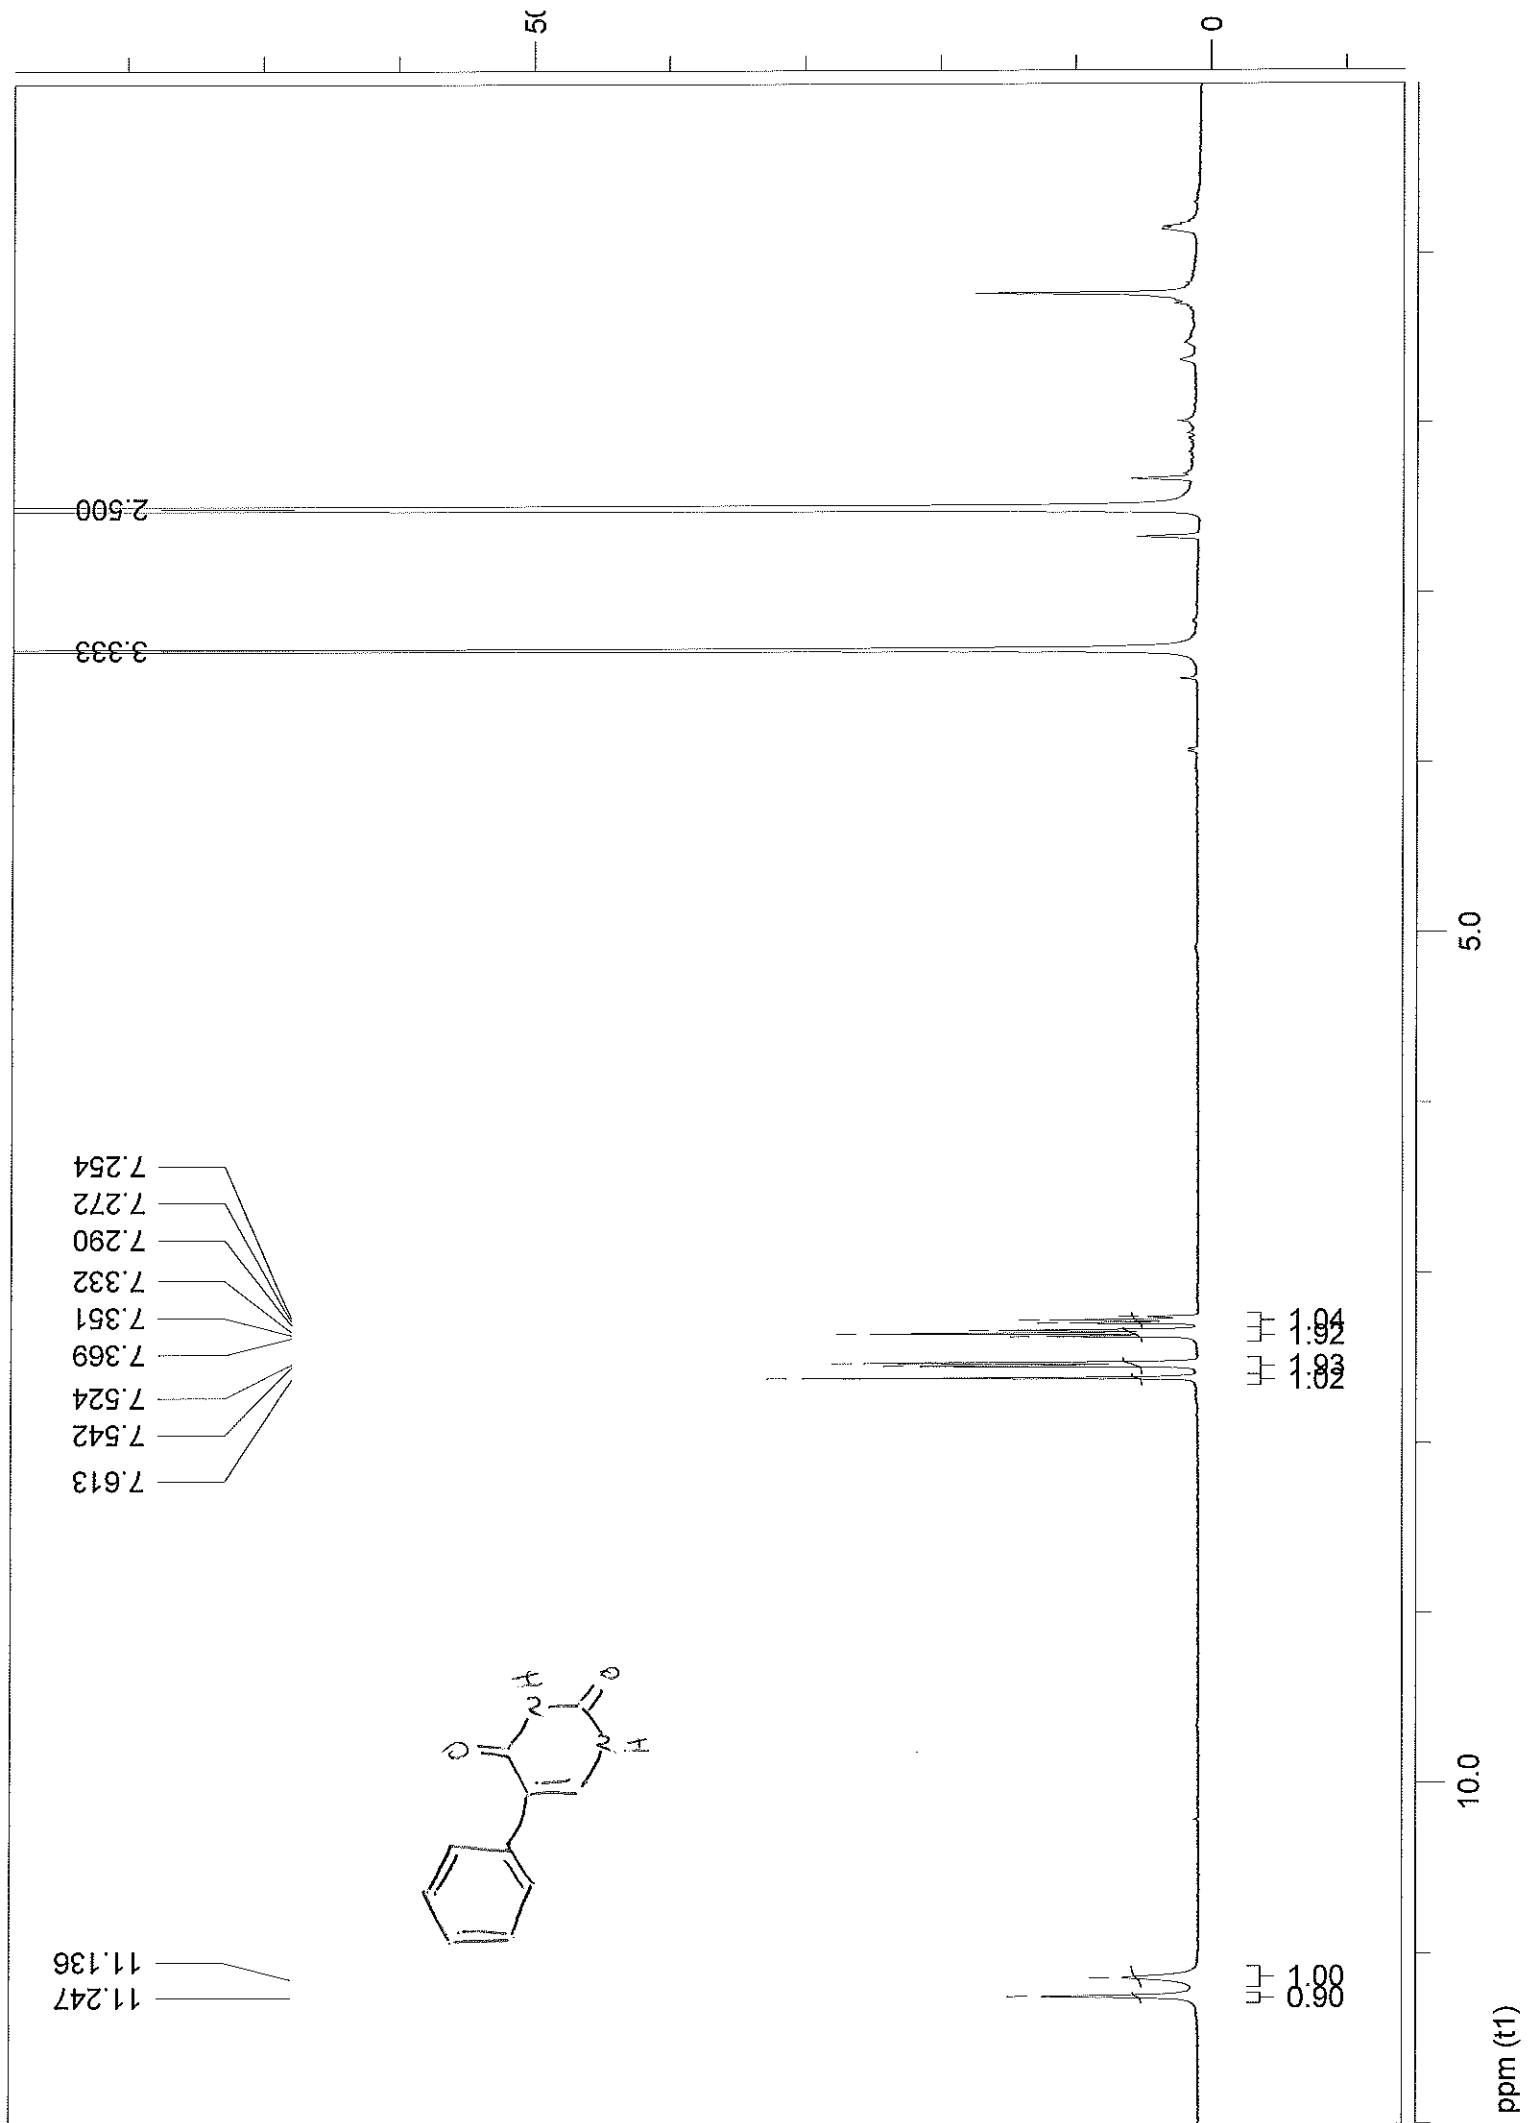

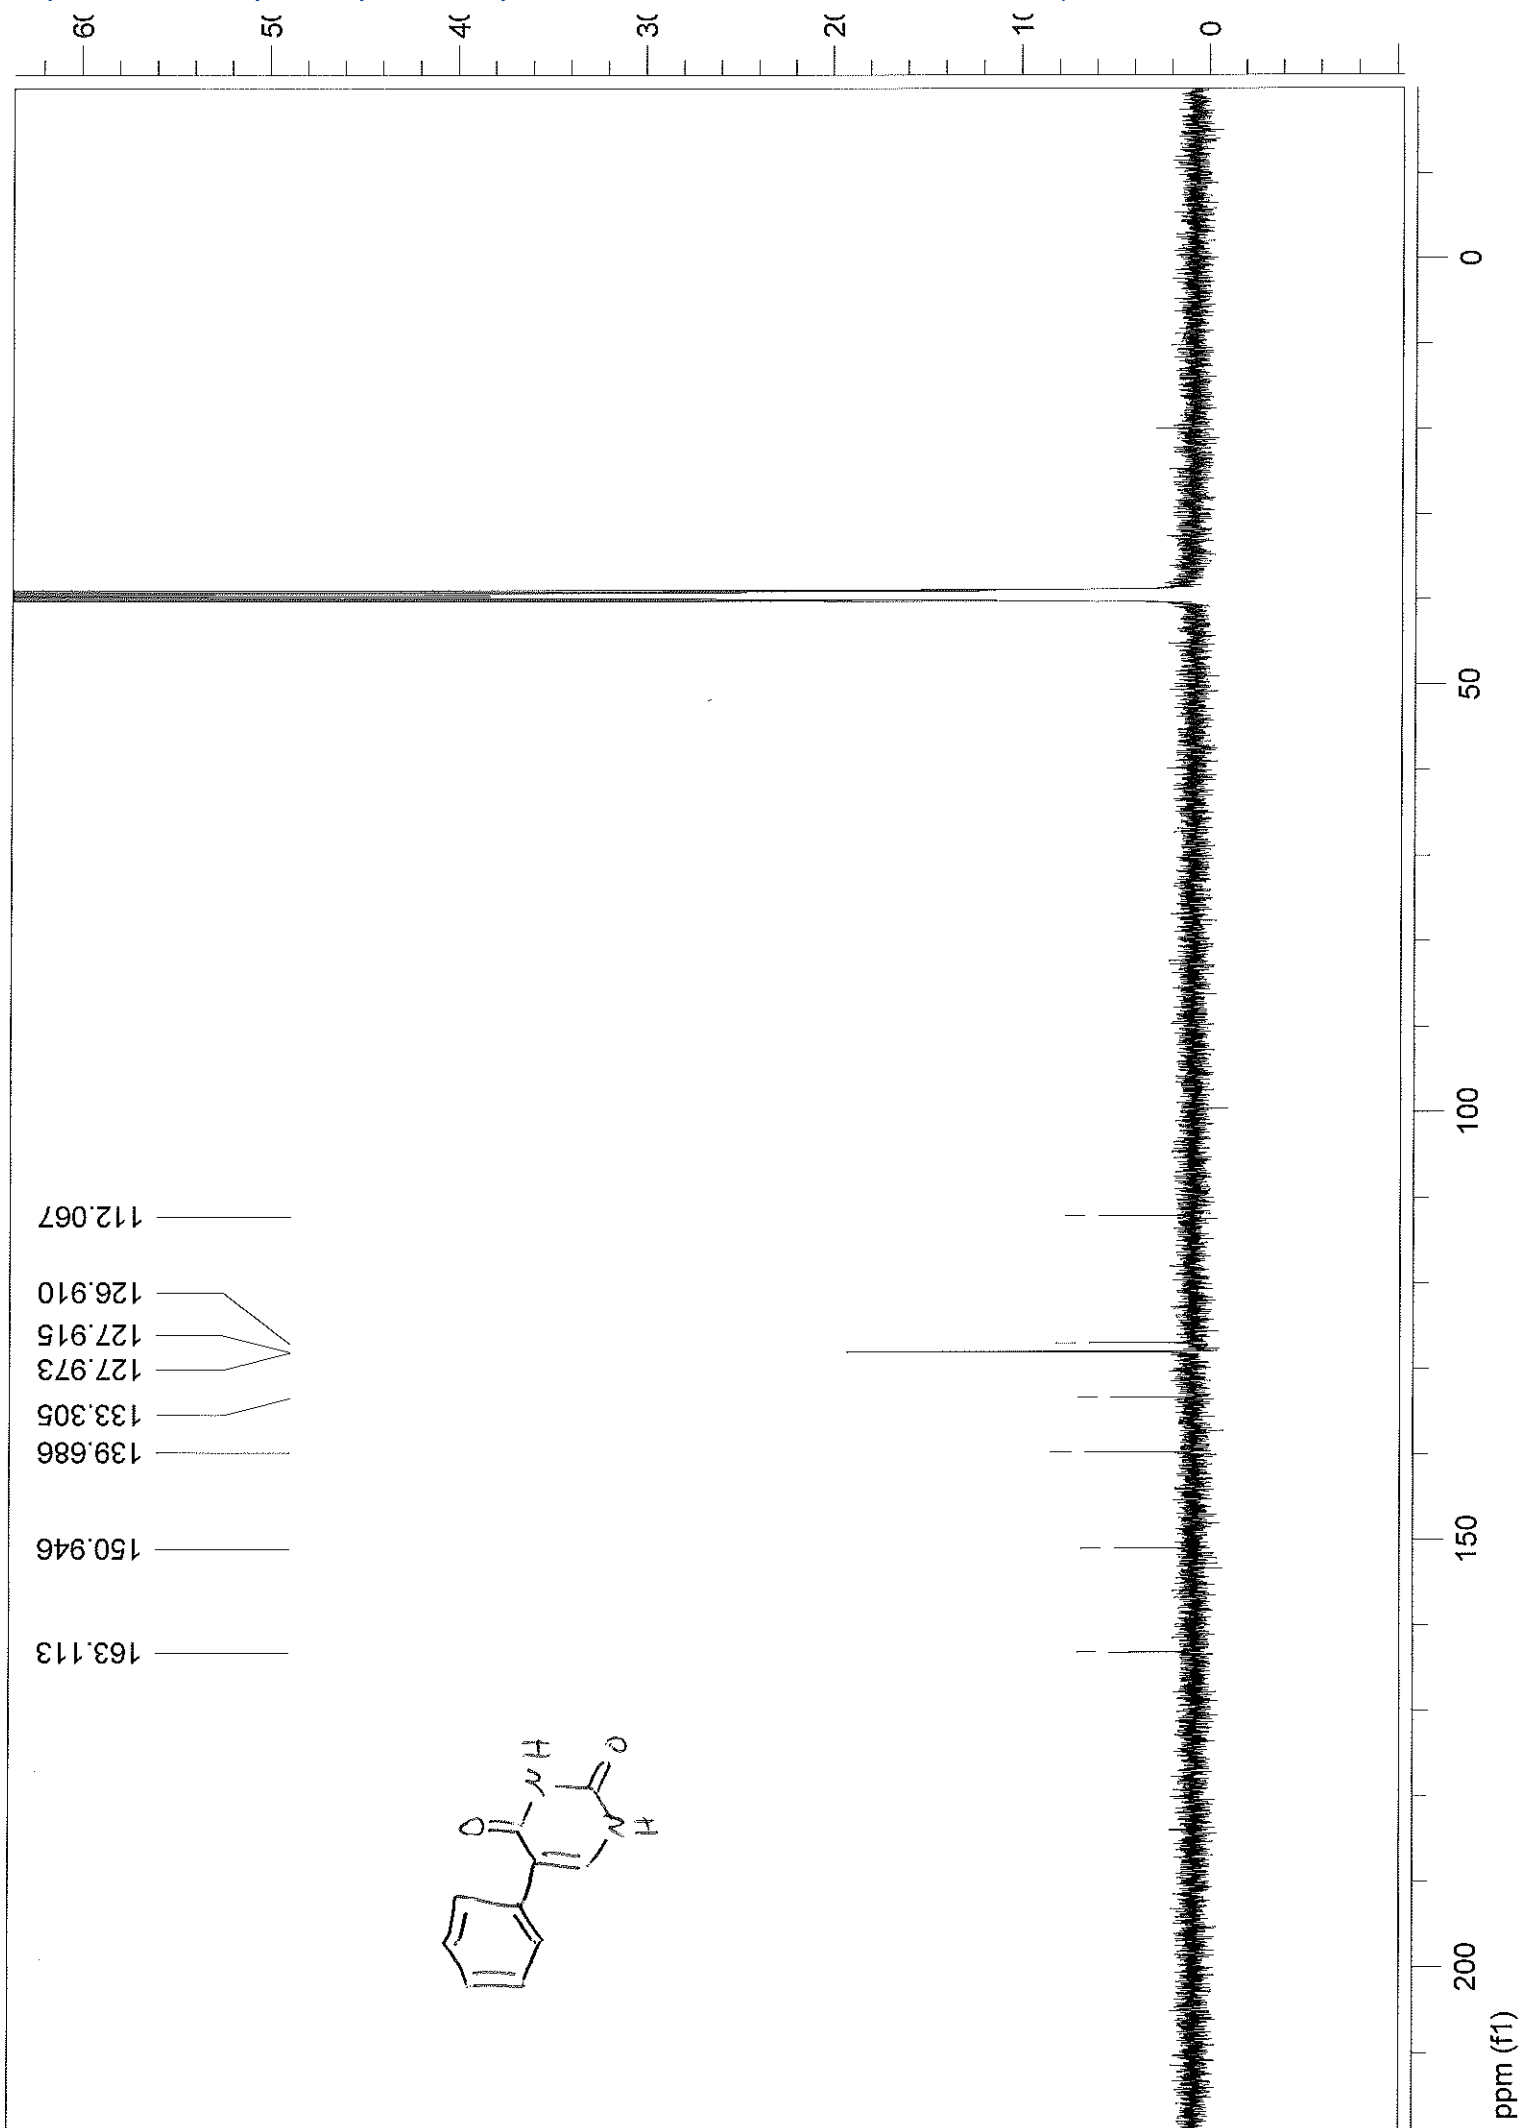

Supplement: c3nj00174a.pdf [file c3nj00174a.pdf]
